# Supplementary material
Source: Research Square preprint supplement (doi:10.21203/rs.3.rs-9282558/v1)
Supplement: Supplementary file 1 [file 2752dc403da74b69235e52eb.xlsx]

## Sheet: Model_vs_Control_DEP
	Accession	Gene.Name	Average.Model.	Average.Control.	log2FoldChange	FoldChange	Regulation	p.value	q.value	logPvalue	Label
26	Q80VA5	Sh3tc2	10.2758	15.8377	-5.56192	0.0211687	DOWN	3.12483e-06	0.0213769	5.50517360458236	Q80VA5
55	Q9D439	Cfap53	10.2758	14.7774	-4.50164	0.0441438	DOWN	1.42534e-05	0.0213769	4.84608152687578	Q9D439
8240	Q9CR51	Atp6v1g1	20.2899	19.5893	0.700553	1.62513	UP	1.53144e-05	0.0213769	4.8149	Q9CR51
21	P11588	Mup1	10.2758	16.1768	-5.901	0.0167349	DOWN	1.59177e-05	0.0213769	4.79811968468066	P11588
1	P51667	Myl2	10.2758	20.825	-10.5492	0.000667363	DOWN	1.83465e-05	0.0213769	4.7364467747725	P51667
8613	P18242	Ctsd	23.4494	21.2967	2.15264	4.4464	UP	1.91267e-05	0.0213769	4.71835995393603	P18242
5	Q8R1T4	Slc35a3	10.2758	18.0339	-7.75809	0.00461936	DOWN	2.07791e-05	0.0213769	4.68237326686057	Q8R1T4
1789	Q6NVE8	Wdr44	18.1984	18.4661	-0.267685	0.830651	DOWN	2.23009e-05	0.0213769	4.65167760972554	Q6NVE8
8873	Q9D1C1	Ube2c	19.5316	11.107	8.42453	343.587	UP	2.27876e-05	0.0213769	4.64230141249592	Q9D1C1
8801	Q3UFY0	Rrp36	15.6845	11.107	4.57744	23.8752	UP	2.41604e-05	0.0213769	4.61689587980444	Q3UFY0
39	Q8BHP7	Olfml2a	10.2758	15.2006	-4.9248	0.032922	DOWN	2.65013e-05	0.0213769	4.57673282157343	Q8BHP7
7860	P51863	Atp6v0d1	20.6754	20.1824	0.492982	1.40735	UP	2.99051e-05	0.0221123	4.52425474100725	P51863
8662	Q8R179	Kbtbd4	14.2058	11.107	3.09875	8.56678	UP	3.25509e-05	0.0222173	4.48743699911944	Q8R179
8872	Q9CRB3	Urah	18.7101	11.107	7.60304	194.422	UP	4.04015e-05	0.0256059	4.39360251039361	Q9CRB3
15	Q8BG58	P4htm	10.2758	16.9236	-6.64784	0.00997242	DOWN	6.90029e-05	0.0408175	4.16113265668982	Q8BG58
872	P08228	Sod1	23.7204	24.2224	-0.502018	0.706119	DOWN	7.9905e-05	0.0443123	4.09742604415949	P08228
14	Q9WV06	Ankrd2	10.2758	16.9961	-6.72027	0.00948409	DOWN	9.46389e-05	0.049396	4.02393031621092	Q9WV06
12	Q9CRB8	Mtfp1	10.2758	17.0787	-6.80294	0.00895592	DOWN	0.000110189	0.0501362	3.95786175827684	Q9CRB8
8765	Q9D1F3	Eola1	15.3667	11.107	4.2597	19.1556	UP	0.000117264	0.0501362	3.93083529565098	Q9D1F3
1216	Q00560	Il6st	17.3135	17.7074	-0.393917	0.76106	DOWN	0.000118812	0.0501362	3.92513969344075	Q00560
8438	Q9CXF0	Kynu	17.0953	16.1072	0.988102	1.98357	UP	0.000129454	0.0501362	3.88788452575372	Q9CXF0
8808	Q8K479	C1qtnf5	15.8371	11.107	4.73003	26.5388	UP	0.000131578	0.0501362	3.88081671921232	Q8K479
1267	Q80W22	Thnsl2	17.9027	18.2822	-0.379472	0.768719	DOWN	0.000133483	0.0501362	3.87457404123807	Q80W22
8845	Q6NXW6	Rad17	16.4703	11.107	5.36322	41.1615	UP	0.000148707	0.0501362	3.82766858769983	Q6NXW6
8644	Q9CR10	Oxld1	13.9271	11.107	2.8201	7.0621	UP	0.000148816	0.0501362	3.82735037296924	Q9CR10
35	Q8CHS7	Dhrs7c	10.2758	15.3889	-5.11314	0.028893	DOWN	0.000157944	0.0501362	3.8014968674884	Q8CHS7
8767	Q9D083	Spc24	15.3914	11.107	4.28439	19.4863	UP	0.000158284	0.0501362	3.80056298319766	Q9D083
296	Q91VC4	Plvap	20.4533	21.3953	-0.94207	0.520486	DOWN	0.000159395	0.0501362	3.79752530594158	Q91VC4
8860	Q9CYP7	Sesn3	16.7686	11.107	5.6616	50.6188	UP	0.000170097	0.0501362	3.76930334596965	Q9CYP7
6478	P26516	Psmd7	20.5676	20.3294	0.238175	1.1795	NOT	0.000178651	0.0501362	3.74799454848888
8360	Q91XV3	Basp1	20.6233	19.7769	0.846372	1.79797	UP	0.00017877	0.0501362	3.74770535985555	Q91XV3
17	Q920M5	Coro6	10.2758	16.4611	-6.18527	0.0137419	DOWN	0.000180814	0.0501362	3.7427679461651
8850	Q8VI94	Oasl1	16.5346	11.107	5.42756	43.0387	UP	0.000196411	0.0528107	3.70683419320119
6514	P36552	Cpox	19.1381	18.8958	0.242292	1.18287	NOT	0.000203674	0.0529641	3.69106440731411
8754	Q9CX97	Wdr55	15.2369	11.107	4.12987	17.5072	UP	0.000219509	0.0529641	3.65854766872388
8198	Q9JJX6	P2rx4	19.483	18.8206	0.662417	1.58273	UP	0.000219923	0.0529641	3.65772934885321
7470	Q8BFR4	Gns	19.6908	19.2946	0.396195	1.31603	UP	0.00022572	0.0529641	3.64643
22	E9Q9K5	Trdn	10.2758	16.1449	-5.86915	0.0171084	DOWN	0.000226827	0.0529641	3.64430525113233
8813	Q8C2E4	Ptcd1	15.8711	11.107	4.76404	27.1718	UP	0.000247617	0.0543322	3.60621954239526
8771	Q9CZ15	Gins1	15.4271	11.107	4.32003	19.9736	UP	0.000252752	0.0543322	3.59730539919679
8861	Q9CTH6	Fcf1	16.8345	11.107	5.72744	52.9824	UP	0.000266041	0.0543322	3.57505142840041
8857	Q6PDJ6	Fbxo42	16.7111	11.107	5.60407	48.64	UP	0.000266254	0.0543322	3.57470385899028
8842	Q9JKF4	Clec6a	16.4001	11.107	5.29311	39.209	UP	0.000269098	0.0543322	3.57008953000359
8817	Q9QUG2	Polk	15.9574	11.107	4.85032	28.8465	UP	0.000275267	0.0543322	3.56024585027371
7928	Q91VX2	Ubap2	16.8943	16.3763	0.517985	1.43195	UP	0.000275549	0.0543322	3.55980116074183
8841	O35205	Gzmk	16.3706	11.107	5.26359	38.4149	UP	0.000294338	0.0567753	3.53115366544046
8695	Q05910	Adam8	14.6586	11.107	3.5516	11.7257	UP	0.000310325	0.057081	3.50818323593792
8858	Q9D123	Tmem219	16.7362	11.107	5.62918	49.494	UP	0.000324259	0.057081	3.48910796097683
8834	Q6IQX7	Chpf	16.19	11.107	5.08299	33.8947	UP	0.000327706	0.057081	3.48451560700628
8810	Q09143	Slc7a1	15.8501	11.107	4.74312	26.7806	UP	0.000330078	0.057081	3.48138342082874
8769	P51880	Fabp7	15.4093	11.107	4.30225	19.729	UP	0.000335348	0.057081	3.47450427942786
8843	P62080	Tspan5	16.4476	11.107	5.34059	40.5208	UP	0.00033611	0.057081	3.47351856613745
8794	P12025	Mdk	15.6033	11.107	4.4963	22.5695	UP	0.000342582	0.057081	3.46523545954342
8837	Q8C9V1	Tbc1d10c	16.3098	11.107	5.20281	36.83	UP	0.000348033	0.057081	3.45837957490852
8816	Q6NXH2	Manea	15.9309	11.107	4.82389	28.3228	UP	0.000361868	0.057081	3.44144981987019
34	Q62513	Znf260	10.2758	15.4239	-5.14813	0.0282006	DOWN	0.000366542	0.057081	3.4358762547932
8018	Q9Z1G3	Atp6v1c1	19.4609	18.9099	0.55099	1.46509	UP	0.000366687	0.057081	3.4357044866261
8704	Q9QYI6	Dnajb9	14.7098	11.107	3.60281	12.1494	UP	0.000377623	0.0573447	3.42294156186104
8867	Q9CQH0	Pdzk1ip1	17.1949	11.107	6.08786	68.0188	UP	0.000381307	0.0573447	3.41872522191367
8307	P08905	Lyz2	22.0913	21.325	0.766295	1.7009	UP	0.000390485	0.0577462	3.40839564435351
1175	Q8CAA7	Pgm2l1	17.4176	17.8179	-0.400365	0.757667	DOWN	0.000398131	0.0579117	3.39997400527252
7917	P81117	Nucb2	19.6687	19.1537	0.514992	1.42899	UP	0.000407733	0.0581416	3.38962413736335
8505	P61166	Tmem258	19.2011	18.0482	1.15289	2.22359	UP	0.000412817	0.0581416	3.38424242655969
8781	Q5RKS2	Smim7	15.5043	11.107	4.39731	21.0728	UP	0.000429711	0.0588578	3.36682352884308
858	Q8BHZ0	Cyria	18.7072	19.2135	-0.506293	0.704029	DOWN	0.000431168	0.0588578	3.36535347866343
8871	Q2YFS1	Pilrb2	18.0445	11.107	6.93744	122.568	UP	0.000449399	0.059303	3.34736789830533
8847	Q61672	Slc29a2	16.4827	11.107	5.37569	41.5188	UP	0.000460921	0.059303	3.33637350455425
264	Q3UZP4	Svip	16.741	17.7328	-0.99186	0.502829	DOWN	0.000461461	0.059303	3.33586499713103
8822	Q9R0T8	Ikbke	16.0238	11.107	4.91676	30.206	UP	0.000465079	0.059303	3.33247327001336
8740	Q8JZY4	Prorp	15.0923	11.107	3.98522	15.8369	UP	0.000476637	0.059303	3.32181224761247
8826	Q99MX0	Tktl1	16.0735	11.107	4.96647	31.2647	UP	0.000477118	0.059303	3.32137419871416
8864	Q9WU81	Slc37a2	17.1081	11.107	6.00107	64.0474	UP	0.000486841	0.059303	3.31261285418077
8763	Q01514	Gbp1	15.3427	11.107	4.23564	18.8388	UP	0.000492832	0.059303	3.30730110081882
8773	Q61144	Psen2	15.4463	11.107	4.33932	20.2425	UP	0.000494582	0.059303	3.3057616935609
8832	O35298	Aoah	16.1724	11.107	5.06538	33.4835	UP	0.000514655	0.0608872	3.28848380358986
8605	P31996	Cd68	20.5088	18.6044	1.90436	3.74342	UP	0.000549576	0.0637866	3.25997224118713
8820	Q3UUV5	Skap1	15.9965	11.107	4.88948	29.64	UP	0.000553541	0.0637866	3.25685020601506
8849	Q99LZ3	Gins4	16.5327	11.107	5.42568	42.9825	UP	0.000570433	0.0644802	3.24379535815033
8811	P61460	Depdc5	15.851	11.107	4.74395	26.796	UP	0.000574094	0.0644802	3.24101699202893
8463	P97821	Ctsc	22.1772	21.1377	1.03953	2.05555	UP	0.000606642	0.0672841	3.21706752522087
8641	Q8K4F6	Nsun5	13.8821	11.107	2.77507	6.84509	UP	0.000616068	0.0672945	3.21037134888286
634	O55192	Slc6a2	18.3572	18.9656	-0.608418	0.655916	DOWN	0.000627932	0.0672945	3.2020873843261
1204	Q80ZW2	Them6	17.5799	17.9752	-0.395332	0.760314	DOWN	0.000631547	0.0672945	3.19959432352337
8034	Q8VEB4	Pla2g15	18.6821	18.1199	0.56219	1.47651	UP	0.000642729	0.0672945	3.19197210423487
8731	Q8C0D9	Cep68	15.0204	11.107	3.9134	15.0679	UP	0.000653676	0.0672945	3.18463746005306
6518	Q3UPL0	Sec31a	20.6849	20.4423	0.24262	1.18314	NOT	0.000663584	0.0672945	3.17810409400916
8488	O08691	Arg2	17.9181	16.8244	1.09365	2.13413	UP	0.000664309	0.0672945	3.17762986373509
68	Q6NZP2	Gpbp1l1	10.2758	14.3277	-4.05192	0.0602905	DOWN	0.00067613	0.0672945	3.16996979391833
8646	Q9ERH7	Hipk3	13.9605	11.107	2.85347	7.22739	UP	0.000685994	0.0672945	3.16367968280387
8507	O35405	Pld3	20.2122	19.0428	1.16938	2.24915	UP	0.000690918	0.0672945	3.16057349280048
7969	Q9D8Y0	Efhd2	20.7744	20.2399	0.534547	1.44849	UP	0.000699717	0.0672945	3.15507757454219
8792	Q07646	Mest	15.589	11.107	4.48195	22.3461	UP	0.000721882	0.0672945	3.14153378710775
23	O89104	Sypl2	10.2758	15.9834	-5.70756	0.0191361	DOWN	0.000728522	0.0672945	3.13755732881597
1812	Q8K3A0	Hscb	17.1771	17.4411	-0.263955	0.832802	DOWN	0.000732356	0.0672945	3.13527775602958
25	O70548	Tcap	10.2758	15.9175	-5.64174	0.0200294	DOWN	0.000735548	0.0672945	3.13338898105347
7385	P24668	M6pr	19.7975	19.4239	0.373613	1.29559	UP	0.000739557	0.0672945	3.13102834792608
480	Q9JM62	Reep6	17.8833	18.5939	-0.71055	0.611087	DOWN	0.000740914	0.0672945	3.13023219889379
8749	P48381	Rfx3	15.1827	11.107	4.07566	16.8615	UP	0.000743251	0.0672945	3.12886449780525
8807	P17125	Tgfb3	15.8013	11.107	4.69423	25.8882	UP	0.000753208	0.0673231	3.12308507588665
8774	Q9CWT3	Snx10	15.4468	11.107	4.33976	20.2487	UP	0.000769625	0.0673231	3.11372083340046
8709	Q56A10	Znf608	14.7594	11.107	3.65239	12.5741	UP	0.000771908	0.0673231	3.11243445804933
8367	Q62230	Siglec1	17.4875	16.6308	0.856675	1.81086	UP	0.000773916	0.0673231	3.11130617460935
303	Q8BSM7	Slc43a1	18.0117	18.9411	-0.929408	0.525074	DOWN	0.000782369	0.0673977	3.10659
8480	Q61553	Fscn1	19.1976	18.1168	1.08077	2.11517	UP	0.00080265	0.0676439	3.09547378997006
8750	Q9JK24	Ppp2r3c	15.1866	11.107	4.0796	16.9076	UP	0.000803004	0.0676439	3.0952822913669
6851	Q8VDP3	Mical1	19.6417	19.3562	0.285577	1.2189	UP	0.000820081	0.0676439	3.0861432499142
8865	P01725		17.1203	11.107	6.01325	64.5903	UP	0.000822488	0.0676439	3.0848704296355
7626	O09159	Man2b1	20.3135	19.8842	0.429315	1.34659	UP	0.000823345	0.0676439	3.08441814753321
8862	Q921I0	Ormdl1	16.9165	11.107	5.80949	56.0828	UP	0.000840144	0.0683908	3.07564626983625
85	P18762	Adrb2	14.5671	17.7003	-3.13322	0.113974	DOWN	0.000858354	0.0692379	3.06633356466916
8728	Q8R007	Nectin4	14.9923	11.107	3.88527	14.7769	UP	0.000869439	0.0695003	3.06076088277307
8802	Q9D0F1	Ndc80	15.6915	11.107	4.5845	23.9923	UP	0.000877662	0.0695312	3.05667270481941
7584	Q8BMP6	Acbd3	19.1574	18.7381	0.419235	1.33722	UP	0.000898807	0.0705289	3.0463335539103
8772	Q9DCH2	Pop7	15.4302	11.107	4.32316	20.0171	UP	0.000916115	0.0705289	3.03805000588394
8856	Q4VA44	Znf664	16.7102	11.107	5.60314	48.6086	UP	0.000917043	0.0705289	3.03761029985355
7830	Q9D1A2	Cndp2	22.6025	22.1186	0.483918	1.39854	UP	0.000943105	0.0705289	3.02543995266879
7671	O88958	Gnpda1	19.4441	19.0033	0.440827	1.35738	UP	0.000952245	0.0705289	3.02125129903258
8848	Q8C3K6	Slc5a1	16.4952	11.107	5.38814	41.8786	UP	0.000957748	0.0705289	3.01874874625156
2306	Q5SUE8	Ankrd40	17.4816	17.669	-0.187395	0.87819	NOT	0.000958026	0.0705289	3.01862270438356
187	Q9DCU2	Pllp	15.7826	17.0033	-1.22066	0.429085	DOWN	0.000958873	0.0705289	3.01823891008859
7517	Q6P5E4	Uggt1	21.2134	20.8069	0.406565	1.32553	UP	0.000961794	0.0705289	3.01691793653131
8869	O09046	Il4i1	17.4517	11.107	6.34462	81.2685	UP	0.000981093	0.070916	3.00828982292336
116	Q8C1Z7	Bbs4	14.3459	16.0908	-1.7449	0.298356	DOWN	0.000991869	0.070916	3.0035456830212
8612	Q810Q5	Nmes1	17.9787	15.8501	2.12854	4.37276	UP	0.000993695	0.070916	3.00274689542481
7637	Q8CHP5	Pym1	18.7613	18.3302	0.431005	1.34817	UP	0.00100008	0.070916	2.99996699487355
8016	Q9D945	Llph	16.2524	15.7019	0.550495	1.46459	UP	0.00101687	0.070916	2.99273670061389
8846	Q8CFA1	Irak2	16.4703	11.107	5.3633	41.1637	UP	0.00102136	0.070916	2.99082115462561
8759	Q8C9E8	Calhm6	15.3102	11.107	4.20319	18.4198	UP	0.00102513	0.070916	2.98922190414676
8851	Q8R023	Pcgf1	16.6133	11.107	5.50628	45.4523	UP	0.00103101	0.070916	2.98673670114343
8	Q9R1A9	Trex2	10.2758	17.6111	-7.33528	0.0061924	DOWN	0.00104662	0.0709826	2.98020972567955
8761	Q7TMX5	Shq1	15.3246	11.107	4.21759	18.6046	UP	0.00104798	0.0709826	2.97964741990525
6097	O70133	Dhx9	20.7127	20.5166	0.196057	1.14556	NOT	0.00109182	0.0733917	2.96184975007747
3	F2Z472	Svs3a	10.2758	18.7113	-8.43554	0.00288835	DOWN	0.00110447	0.0736836	2.95684804217164
7732	Q91VI7	Rnh1	22.4718	22.0149	0.456948	1.37263	UP	0.00111606	0.0739013	2.95231401339054
7428	P06151	Ldha	24.0446	23.6609	0.38376	1.30474	UP	0.00114209	0.0745808	2.9422992908158
8729	Q9R007	Clec5a	15.0017	11.107	3.89463	14.8731	UP	0.0011438	0.0745808	2.94165104687411
4517	O88712	Ctbp1	21.2551	21.2085	0.046545	1.03279	NOT	0.00115153	0.0745808	2.93872323460432
6933	Q7TNE3	Spag7	20.5962	20.2981	0.2981	1.22952	UP	0.00117314	0.0754294	2.93065052722246
2703	Q8BPM2	Map4k5	16.827	16.9628	-0.135788	0.910173	NOT	0.00120034	0.0766232	2.92069572127797
83	P02816	Pip	10.2758	13.5588	-3.28301	0.102734	DOWN	0.00123131	0.0780389	2.90963153529441
8809	A2ACJ2	Faap100	15.8458	11.107	4.73872	26.6992	UP	0.0012505	0.0783921	2.90291769312237
8280	P07091	S100a4	20.1281	19.3843	0.743788	1.67457	UP	0.00126676	0.0783921	2.89730497295867
8397	P49935	Ctsh	21.2182	20.3212	0.896972	1.86215	UP	0.00127425	0.0783921	2.89474501691578
6640	P21981	Tgm2	22.9952	22.7373	0.257918	1.19575	NOT	0.00127549	0.0783921	2.89432396344152
7479	P70158	Smpdl3a	19.2422	18.8447	0.397543	1.31726	UP	0.00128477	0.0783921	2.8911739368677
1681	Q921V7	Slc44a3	17.7115	17.9997	-0.288143	0.818956	DOWN	0.0012899	0.0783921	2.88944530400066
8868	P01629		17.404	11.107	6.29696	78.6273	UP	0.00132814	0.0801674	2.87675516234191
8606	O70370	Ctss	22.511	20.6052	1.9058	3.74718	UP	0.00135552	0.0812672	2.86789374985519
8712	Q8BU27	Ppm1m	14.8132	11.107	3.70612	13.0513	UP	0.00137159	0.0814182	2.86277537326777
7823	P62843	Rps15	18.6287	18.1473	0.481325	1.39603	UP	0.00137639	0.0814182	2.86125786029257
6456	Q9DBM2	Ehhadh	16.7025	16.4666	0.2359	1.17764	NOT	0.00138816	0.0815705	2.85756047400192
8727	Q8R043	Smim29	14.9718	11.107	3.86475	14.5682	UP	0.00142807	0.0829311	2.84525202470349
8655	Q8BIY3	Zc3h12d	14.8239	11.8664	2.95748	7.76763	UP	0.00143001	0.0829311	2.84466153292226
8764	Q9DBY0	Foxp4	15.3502	11.107	4.24317	18.9375	UP	0.0014505	0.0831426	2.83848256627161
261	P55271	Cdkn2b	15.711	16.7105	-0.999545	0.500158	DOWN	0.00145239	0.0831426	2.83791525485426
1070	Q8R1H0	Hopx	22.3184	22.7472	-0.428805	0.742877	DOWN	0.00146545	0.0833521	2.83402958747033
8539	Q61207	Psap	21.1477	19.8657	1.28198	2.43172	UP	0.0015008	0.0848193	2.82367602146527
8798	Q8R070	Slc37a1	15.6702	11.107	4.56316	23.64	UP	0.00152446	0.0856107	2.81688539093791
5711	Q9CQ25	Mzt2	16.6413	16.4854	0.155853	1.11408	NOT	0.00155781	0.086556	2.80748467627984
1897	P70290	Mpp1	20.1214	20.3711	-0.249702	0.84107	NOT	0.00156353	0.086556	2.8058926703201
6462	Q9CT10	Ranbp3	18.5463	18.3097	0.236567	1.17819	NOT	0.00157055	0.086556	2.80394767980722
7551	Q3TW96	Uap1l1	21.1522	20.7398	0.412423	1.33092	UP	0.00159165	0.0871773	2.79815215355196
207	A2AAJ9	Obscn	16.2191	17.3747	-1.15552	0.448904	DOWN	0.00161917	0.0881406	2.79070701493827
7020	Q9R0P3	Esd	22.7694	22.459	0.310362	1.24002	UP	0.00164821	0.0889017	2.78298640126428
424	P70232	Chl1	23.2427	24.0069	-0.76416	0.588796	DOWN	0.00165319	0.0889017	2.78167644228932
672	Q9WVB4	Slit3	15.0612	15.6476	-0.586315	0.666042	DOWN	0.00168182	0.0898965	2.77421945433366
8564	P58242	Smpdl3b	18.415	16.9797	1.43535	2.70449	UP	0.00169311	0.0899579	2.77131482520996
711	Q9WVK4	Ehd1	21.959	22.5301	-0.571145	0.673082	DOWN	0.00172911	0.0905632	2.76217662403501
8758	Q6GQV7	Edrf1	15.3022	11.107	4.19521	18.3182	UP	0.00173139	0.0905632	2.76160384099197
7189	Q9CQV4	Retreg3	18.042	17.7065	0.335537	1.26185	UP	0.00173512	0.0905632	2.76066948306825
6397	O54984	Get3	20.3731	20.1436	0.22948	1.17241	NOT	0.00175479	0.091054	2.75577534415061
8823	Q8CII9	Crlf2	16.0272	11.107	4.92017	30.2774	UP	0.00182848	0.093555	2.73790931060029
1174	Q8CE33	Klhl11	15.2115	15.6129	-0.401363	0.757143	DOWN	0.00184395	0.093555	2.73425203694439
1644	Q9QZS3	Numb	19.6323	19.9254	-0.293052	0.816173	DOWN	0.00184454	0.093555	2.73411121604301
2802	Q80X85	Mrps7	18.8349	18.9579	-0.12308	0.918225	NOT	0.00184537	0.093555	2.73391560258039
8839	Q9WU67	Ly6i	16.3472	11.107	5.24021	37.7973	UP	0.00188274	0.093555	2.72520965043561
11	P70402	Mybph	10.2758	17.0852	-6.80937	0.00891611	DOWN	0.0018891	0.093555	2.72374436229408
8443	P14483	H2-Ab1	21.312	20.3116	1.00035	2.00049	UP	0.00189071	0.093555	2.72337553819925
630	Q9CWY3	Setd6	17.2798	17.8901	-0.610317	0.655053	DOWN	0.00189353	0.093555	2.72272780977672
8853	P01811		16.6496	11.107	5.5426	46.6109	UP	0.00190787	0.093555	2.71945213146852
983	Q8K2P1	Lurap1l	16.927	17.3861	-0.459058	0.727461	DOWN	0.00191046	0.093555	2.71886273283707
8324	Q7TMR0	Prcp	19.3564	18.5768	0.77963	1.71669	UP	0.00191897	0.093555	2.71693181470502
7623	P98078	Dab2	19.4493	19.0204	0.42891	1.34622	UP	0.00195604	0.0945565	2.70862
8778	P18340	Cxcl9	15.4924	11.107	4.38538	20.8993	UP	0.00196082	0.0945565	2.70756116458093
177	P30115	Gsta3	20.8495	22.1219	-1.27241	0.413969	DOWN	0.00197464	0.094673	2.70451250966397
8096	Q9WTR1	Trpv2	18.0899	17.4968	0.59302	1.5084	UP	0.00198458	0.094673	2.70233117081319
7837	Q9WV54	Asah1	21.6149	21.1284	0.486555	1.4011	UP	0.00199673	0.0947431	2.69968152694317
5789	Q8C7X2	Emc1	19.3716	19.2068	0.16482	1.12103	NOT	0.00201832	0.095258	2.69501105212994
1012	Q9EPT5	Slco2a1	21.0562	21.5072	-0.450915	0.731579	DOWN	0.00203622	0.0955946	2.69117508789137
8518	P30275	Ckmt1	18.5659	17.3537	1.21218	2.31687	UP	0.00205559	0.0957165	2.68706308118078
7902	Q9WTK5	Nfkb2	18.3983	17.8896	0.508702	1.42277	UP	0.00206039	0.0957165	2.68605035583032
61	Q08376	Zbtb14	10.2758	14.5008	-4.22501	0.0534742	DOWN	0.00207678	0.0959755	2.6826088798857
180	Q80WR1	Tspan18	17.2757	18.5463	-1.27058	0.414492	DOWN	0.00210171	0.0966243	2.67742679610041
36	P46660	Ina	10.2758	15.3225	-5.04666	0.0302555	DOWN	0.00213392	0.0975991	2.67082288377105
6185	Q99K48	Nono	20.9023	20.6954	0.206843	1.15416	NOT	0.00218411	0.0993826	2.66072569155463
132	Q91V80	Apof	14.5871	16.2124	-1.62529	0.324144	DOWN	0.00223038	0.100569	2.65162211150842
2623	Q6PIU9		19.1119	19.2572	-0.145297	0.904193	NOT	0.00225743	0.100569	2.64638570771881
7392	Q9JKV1	Adrm1	19.7063	19.3311	0.375202	1.29702	UP	0.00226072	0.100569	2.64575379989736
8328	Q8R2K1	Fuom	19.0534	18.267	0.786432	1.7248	UP	0.00226345	0.100569	2.64522928657545
6834	O08547	Sec22b	20.4032	20.1193	0.283878	1.21746	UP	0.00227291	0.100569	2.64341833383645
8673	Q8VD12	Znf385a	14.3725	11.107	3.26546	9.61617	UP	0.00227819	0.100569	2.64241005878608
8591	Q8BYI6	Lpcat2	18.7411	17.0755	1.66561	3.17248	UP	0.00229265	0.100707	2.63966148265732
8503	P10810	Cd14	18.7188	17.5675	1.15123	2.22104	UP	0.00231226	0.100798	2.6359637092978
8780	Q9CPV5	Pmf1	15.5039	11.107	4.39689	21.0666	UP	0.00231746	0.100798	2.63498756576051
6711	Q62167	Ddx3x	21.675	21.4064	0.268553	1.2046	UP	0.00240518	0.102496	2.61885277727053
1140	Q9ET66	Pi16	17.0131	17.4243	-0.41116	0.752018	DOWN	0.00241247	0.102496	2.61753789855025
80	Q3UIW5	Rnf10	10.9388	14.2852	-3.34646	0.0983138	DOWN	0.00241738	0.102496	2.61665561427919
6051	P70372	Elavl1	21.0424	20.8516	0.190848	1.14143	NOT	0.00242798	0.102496	2.61475489499604
8537	O89017	Lgmn	19.6604	18.3798	1.28058	2.42936	UP	0.00243964	0.102496	2.61267425462371
8698	Q80UK7	Sass6	14.6812	11.107	3.57421	11.9109	UP	0.00245709	0.102496	2.60957946584348
8342	Q05816	Fabp5	23.2838	22.4798	0.804025	1.74597	UP	0.00245756	0.102496	2.60949587030119
200	O88783	F5	17.475	18.6492	-1.17424	0.443116	DOWN	0.00245931	0.102496	2.60918637110556
2039	Q03249	Galt	16.989	17.2169	-0.227868	0.853896	NOT	0.00247848	0.102496	2.60581458126748
8618	P52850	Ndst2	13.4134	11.107	2.3064	4.94648	UP	0.00247931	0.102496	2.60566881758383
228	Q5NC32	Slc16a11	15.2797	16.3745	-1.09475	0.468217	DOWN	0.00248655	0.102496	2.60440297812895
8777	Q9ET39	Slamf6	15.4833	11.107	4.37631	20.7682	UP	0.00249511	0.102496	2.60291117350308
8726	P29352	Ptpn22	14.942	11.107	3.83493	14.2701	UP	0.00253719	0.103443	2.59564649547163
8091	P50543	S100a11	23.9473	23.3571	0.590235	1.50549	UP	0.00254149	0.103443	2.59491244918632
7672	Q80Y14	Glrx5	19.0549	18.6141	0.440855	1.35741	UP	0.00257114	0.104172	2.58987478187179
8509	P24452	Capg	22.9192	21.747	1.1722	2.25354	UP	0.00260134	0.104448	2.58480354879548
7250	Q07813	Bax	20.0336	19.6867	0.346847	1.27178	UP	0.00260149	0.104448	2.5847781730529
6546	Q64213	Sf1	20.023	19.7763	0.246732	1.18652	NOT	0.00265953	0.106297	2.57519477979732
8500	Q8BGS0	Mak16	16.7438	15.6158	1.12802	2.18558	UP	0.00269749	0.106861	2.56904080063524
8565	O09049	Reg3g	18.5432	17.1049	1.43834	2.71009	UP	0.00273364	0.106861	2.56325931482884
1444	Q6ZQ82	Arhgap26	16.3255	16.664	-0.33855	0.790836	DOWN	0.00274881	0.106861	2.56085559389702
334	P50172	Hsd11b1	22.3544	23.2367	-0.882325	0.542492	DOWN	0.00277896	0.106861	2.55611707924012
8707	P47930	Fosl2	14.7433	11.107	3.63631	12.4348	UP	0.00277965	0.106861	2.55600972864628
7900	Q9DBJ1	Pgam1	21.5375	21.0289	0.508613	1.42268	UP	0.00278195	0.106861	2.55565021151618
8017	P61211	Arl1	19.6552	19.1045	0.550708	1.4648	UP	0.00278309	0.106861	2.55547290520356
5549	P62827	Ran	22.988	22.8456	0.14242	1.10376	NOT	0.00279648	0.106861	2.55338812703239
514	O35457	Ccrl2	16.2715	16.9554	-0.68385	0.622502	DOWN	0.00280788	0.106861	2.5516211471924
7068	Q9WVJ2	Psmd13	20.5356	20.2184	0.317173	1.24589	UP	0.00280809	0.106861	2.55158975036266
6499	Q8BHL5	Elmo2	18.534	18.293	0.240998	1.18181	NOT	0.00281577	0.106861	2.55040282247392
8271	Q9JLM8	Dclk1	17.9241	17.1878	0.736285	1.66588	UP	0.00282041	0.106861	2.54968821611328
8657	Q6NS57	Mapkbp1	14.0863	11.107	2.97924	7.88571	UP	0.00283021	0.106861	2.54818164577156
8064	P09103	P4hb	23.6444	23.0688	0.5756	1.4903	UP	0.00284292	0.106887	2.5462355139832
6780	D3Z4S3	Ptrhd1	17.8118	17.5347	0.27705	1.21171	UP	0.0028672	0.107345	2.54254125466916
8364	P0DOV1	Mnda	18.9351	18.0804	0.854783	1.80849	UP	0.00292068	0.108887	2.53451602325486
8400	P24638	Acp2	18.9703	18.0638	0.90654	1.87454	UP	0.00294302	0.109261	2.53120752437656
8854	P07607	Tyms	16.6867	11.107	5.57966	47.824	UP	0.0029653	0.10963	2.52793121595767
6654	Q61656	Ddx5	21.6731	21.4129	0.260172	1.19762	NOT	0.00299925	0.110425	2.52298747727583
1027	Q9R0Q6	Arpc1a	19.4997	19.9456	-0.445918	0.734117	DOWN	0.00301835	0.110669	2.52023011421472
8458	P20060	Hexb	20.7784	19.7468	1.03155	2.04422	UP	0.00305219	0.111449	2.51538843487732
8546	P29416	Hexa	20.8312	19.5037	1.32751	2.50969	UP	0.00307538	0.111836	2.51210064942709
8671	Q80WV3	Chst2	14.3415	11.107	3.2345	9.41202	UP	0.00312045	0.113011	2.50578235434071
6229	P84089	Erh	21.2943	21.0824	0.211945	1.15825	NOT	0.00313951	0.113165	2.50313826761607
1300	Q91VN4	Chchd6	16.9371	17.308	-0.370825	0.77334	DOWN	0.00315021	0.113165	2.50165994276205
2459	P26645	Marcks	21.7957	21.9611	-0.165463	0.891643	NOT	0.00317045	0.113433	2.49887868057573
7256	Q8VI75	Ipo4	18.8076	18.4598	0.347872	1.27268	UP	0.00323276	0.115198	2.49042586449227
587	O35632	Hyal2	17.9961	18.6293	-0.633123	0.644779	DOWN	0.00326874	0.115855	2.48561895810194
7895	Q8JZV7	Amdhd2	18.7163	18.2094	0.50692	1.42101	UP	0.00328267	0.115855	2.48377250920074
75	Q0VF22	Ccdc138	10.6506	14.2145	-3.56388	0.0845599	DOWN	0.00330402	0.115855	2.48095772679137
6856	O88685	Psmc3	21.216	20.93	0.286023	1.21927	UP	0.00330598	0.115855	2.48070017218255
5757	Q921W0	Chmp1a	18.3441	18.182	0.162085	1.1189	NOT	0.00331647	0.115855	2.47932353402028
8430	Q3U2S8	Hvcn1	17.457	16.514	0.942995	1.92252	UP	0.00337495	0.117036	2.47173265687294
7704	P62274	Rps29	19.9256	19.4753	0.450263	1.36629	UP	0.00337669	0.117036	2.4715091941685
1112	Q62011	Pdpn	18.7411	19.1596	-0.418465	0.74822	DOWN	0.00340876	0.117314	2.46740370239973
1888	Q64704	Stx3	18.1364	18.3878	-0.251375	0.840095	NOT	0.00341277	0.117314	2.46689297954928
8428	Q920A5	Scpep1	18.9975	18.0557	0.941858	1.921	UP	0.00343557	0.117314	2.46400107183866
7934	P50518	Atp6v1e1	20.3312	19.8117	0.51959	1.43355	UP	0.00343758	0.117314	2.46374769141164
7403	Q9CRC8	Lrrc40	17.0214	16.6446	0.376843	1.2985	UP	0.00348618	0.118517	2.45764969465695
7602	Q61129	Cfi	19.9203	19.4975	0.422777	1.34051	UP	0.00352868	0.11867	2.45238797020435
507	Q80W04	Tmcc2	18.6406	19.3309	-0.690312	0.61972	DOWN	0.00352947	0.11867	2.45229062824289
8477	Q9D964	Gatm	17.1555	16.0826	1.07298	2.10377	UP	0.00354594	0.11867	2.45026910717212
1854	Q9CZL5	Pcbd2	18.7289	18.9865	-0.257638	0.836457	NOT	0.00356843	0.11867	2.44752269644354
7003	Q64337	Sqstm1	18.3907	18.0828	0.307862	1.23787	UP	0.00358599	0.11867	2.4453908047502
7327	Q61543	Glg1	19.7063	19.3451	0.361183	1.28448	UP	0.00359439	0.11867	2.44437
8236	A2AAY5	Sh3pxd2b	18.0947	17.399	0.695723	1.6197	UP	0.0035972	0.11867	2.44403517379613
8286	Q61362	Chi3l1	21.3801	20.6319	0.748152	1.67964	UP	0.00359767	0.11867	2.4439786752739
8260	Q5SU73	Coil	16.6113	15.8868	0.724515	1.65235	UP	0.00361554	0.118817	2.44182706958755
8146	Q8R0X7	Sgpl1	20.4099	19.786	0.62388	1.54101	UP	0.00363565	0.119037	2.43941781303224
5963	Q8VIJ6	Sfpq	21.3334	21.1521	0.181298	1.1339	NOT	0.0036631	0.119495	2.43615122524608
7717	Q5SSL4	Abr	18.6683	18.2148	0.453473	1.36933	UP	0.00368651	0.119818	2.43338458369526
6339	Q9CZ30	Ola1	20.3664	20.1429	0.22345	1.16752	NOT	0.0037113	0.11995	2.43047405540085
8063	P17932	Rpl32-ps	21.9068	21.3323	0.57455	1.48921	UP	0.00371759	0.11995	2.42973850874273
468	Q9WV69	Dmtn	17.9422	18.6666	-0.72438	0.605257	DOWN	0.00374744	0.12044	2.42626519599166
7282	P62962	Pfn1	24.3821	24.0299	0.352152	1.27646	UP	0.00375995	0.12044	2.42481816131415
7491	P50516	Atp6v1a	20.6839	20.2829	0.400948	1.32037	UP	0.00378751	0.120887	2.42164655583391
7378	Q91WT8	Rbm47	17.5823	17.2101	0.37216	1.29429	UP	0.00384227	0.121463	2.41541189405065
5736	P61965	Wdr5	18.4458	18.288	0.157798	1.11558	NOT	0.0038444	0.121463	2.41517199626179
6682	O35143	Atp5if1	20.3692	20.1048	0.264345	1.20109	UP	0.00384662	0.121463	2.41492026305783
7358	P97855	G3bp1	19.9595	19.5907	0.368815	1.29129	UP	0.00392068	0.123362	2.40663882425566
8385	Q9QXH4	Itgax	18.674	17.7913	0.882695	1.84382	UP	0.00393605	0.123408	2.40493917264825
8148	Q80TZ9	Rere	17.3595	16.7354	0.624127	1.54128	UP	0.00397187	0.124093	2.40100497447841
7245	Q01405	Sec23a	19.9063	19.5612	0.345042	1.27019	UP	0.00400052	0.12455	2.39788322838046
6322	Q7TQK1	Ints7	16.3034	16.0811	0.222302	1.16659	NOT	0.00403631	0.125117	2.39401580890308
2300	Q8R1X6	Spart	17.2881	17.476	-0.187897	0.877884	NOT	0.00404696	0.125117	2.39287076619635
589	O08709	Prdx6	25.3956	26.0282	-0.632598	0.645014	DOWN	0.00406449	0.125223	2.39099
574	Q9JHL1	Nherf2	20.8016	21.447	-0.645437	0.639299	DOWN	0.00410772	0.126117	2.38639874455475
8173	Q9R1S3	Pign	16.5303	15.8827	0.6476	1.56656	UP	0.00413219	0.126431	2.3838194023321
8471	Q9JLF6	Tgm1	17.864	16.809	1.05502	2.07775	UP	0.00416805	0.12709	2.38006707987316
671	Q9WVT6	Ca14	18.8124	19.399	-0.58659	0.665915	DOWN	0.00426395	0.129305	2.37018769287747
7427	Q9DBU0	Tm9sf1	18.0722	17.6887	0.38345	1.30446	UP	0.00430015	0.129305	2.36651629388196
8223	Q9ET22	Dpp7	19.5935	18.9106	0.682925	1.60539	UP	0.00432593	0.129305	2.36392081355265
1465	Q5FWI3	Cemip2	19.0774	19.4115	-0.334132	0.793261	DOWN	0.00433351	0.129305	2.36315989626874
7967	Q6PGN3	Dclk2	18.4689	17.9347	0.534177	1.44812	UP	0.00434006	0.129305	2.36250436652429
8374	P16675	Ctsa	20.6396	19.7691	0.87047	1.82826	UP	0.00434546	0.129305	2.36196374369662
1332	Q8R4H2	Arhgef12	19.3112	19.6749	-0.363667	0.777186	DOWN	0.00435278	0.129305	2.36123338235259
1425	E9PXF8	Sbf2	17.2507	17.5926	-0.34191	0.788996	DOWN	0.00435729	0.129305	2.36078393326016
196	P11627	L1cam	14.931	16.1188	-1.18776	0.438982	DOWN	0.00437798	0.129486	2.35872672275736
7786	P11438	Lamp1	21.6349	21.1639	0.470973	1.38604	UP	0.00439524	0.12952	2.35701770192875
5698	Q9D0E1	Hnrnpm	22.1117	21.9568	0.154872	1.11332	NOT	0.0044158	0.12952	2.35499040815822
712	Q6PDI6	Mindy2	17.2947	17.8658	-0.571145	0.673082	DOWN	0.00442805	0.12952	2.35378758194149
332	Q8VCC2	Ces1	19.0433	19.9272	-0.883895	0.541902	DOWN	0.00444734	0.12952	2.35190015564849
8062	P62814	Atp6v1b2	21.2499	20.6759	0.574037	1.48868	UP	0.00445384	0.12952	2.35126509611101
8246	Q9D7V9	Naaa	20.1777	19.4721	0.705585	1.63081	UP	0.00448393	0.12952	2.34834127278365
1409	Q68FH0	Pkp4	17.585	17.9309	-0.345967	0.78678	DOWN	0.00449766	0.12952	2.34701328153214
2648	O88428	Papss2	18.6094	18.7522	-0.142772	0.905777	NOT	0.00451673	0.12952	2.34517635057613
8433	Q9Z0K8	Vnn1	19.2162	18.2705	0.945743	1.92618	UP	0.00453541	0.12952	2.34338392549215
7876	Q8K2I4	Manba	18.5037	18.0049	0.49878	1.41302	UP	0.00453625	0.12952	2.34330340174618
7178	Q9Z1Z0	Uso1	20.615	20.2817	0.333267	1.25986	UP	0.00456571	0.12952	2.34049129654968
8000	Q6PD26	Pigs	18.6257	18.0818	0.543865	1.45787	UP	0.0045679	0.12952	2.34028379248994
1569	P83917	Cbx1	19.3418	19.6501	-0.308305	0.80759	DOWN	0.00456889	0.12952	2.3401894879452
7112	Q9R1P3	Psmb2	21.947	21.6228	0.32428	1.25204	UP	0.00466215	0.131093	2.33141385075458
8757	Q3TCT4	Entpd7	15.2986	11.107	4.1916	18.2724	UP	0.00466501	0.131093	2.33114732785882
8394	P12265	Gusb	19.7316	18.8379	0.893757	1.85801	UP	0.00466869	0.131093	2.33080496217094
8373	Q60952	Cep250	15.9441	15.0753	0.868718	1.82604	UP	0.00471143	0.131876	2.3268470726638
8501	Q6QLQ4	Clec7a	17.5339	16.3979	1.13603	2.19775	UP	0.00472944	0.131882	2.32519018800681
213	P10649	Gstm1	23.6036	24.7353	-1.13171	0.456374	DOWN	0.0047414	0.131882	2.32409349622988
8296	Q9CQI6	Cotl1	20.9939	20.2355	0.75836	1.69157	UP	0.00476069	0.132005	2.32233018861485
6297	Q9QY36	Naa10	18.2194	17.9997	0.219675	1.16447	NOT	0.00483923	0.133765	2.31522409513441
8534	O70200	Aif1	18.1524	16.8758	1.27659	2.42266	UP	0.00488298	0.134086	2.31131469875972
7774	Q9D7J6	Dnase1l1	16.1519	15.6836	0.468303	1.38348	UP	0.00488529	0.134086	2.31110920615117
7649	Q3UZ39	Lrrfip1	19.6591	19.2247	0.434403	1.35135	UP	0.00490835	0.134086	2.30906456505964
5875	O88342	Wdr1	22.55	22.3778	0.17226	1.12682	NOT	0.0049113	0.134086	2.30880362520514
6064	P56391	Cox6b1	22.2952	22.103	0.192273	1.14256	NOT	0.00492653	0.134089	2.30745869193073
8859	Q9QUN3	Blnk	16.7623	11.107	5.6553	50.3982	UP	0.00499603	0.135565	2.30137513630843
1859	Q8CB27	Yod1	16.6309	16.8878	-0.256827	0.836926	NOT	0.00501377	0.135632	2.29983524611872
8836	P05208	Cela2a	16.2824	11.107	5.1754	36.1369	UP	0.00504269	0.135991	2.29733798769878
1415	P60904	Dnajc5	17.2103	17.554	-0.343785	0.787971	DOWN	0.00510395	0.135991	2.29209367384983
534	Q8K2A1	Gulp1	17.5247	18.1945	-0.66982	0.628585	DOWN	0.00512835	0.135991	2.29002217334667
87	Q5U4C9	Dyrk2	10.5258	13.523	-2.99716	0.125247	DOWN	0.00514926	0.135991	2.28825509458041
8169	P55194	Sh3bp1	18.8079	18.163	0.644892	1.56362	UP	0.00517062	0.135991	2.28645746228473
20	Q8R4E4	Myoz3	10.2758	16.3243	-6.04855	0.015108	DOWN	0.00517498	0.135991	2.28609107254125
8717	Q03404	Tff2	14.842	11.107	3.73498	13.315	UP	0.00520565	0.135991	2.28352520173313
1089	Q3URD3	Slmap	18.795	19.2201	-0.425105	0.744785	DOWN	0.00520866	0.135991	2.28327390722852
97	Q9DBM1	Gpatch1	16.3684	18.7418	-2.37337	0.192994	DOWN	0.00522678	0.135991	2.28176544701271
8831	Q60754	Marco	16.1599	11.107	5.05286	33.1943	UP	0.0052429	0.135991	2.28042801151183
1581	Q922J3	Clip1	19.0816	19.388	-0.306443	0.808633	DOWN	0.00524296	0.135991	2.28042353846087
395	Q9QZ57	Hspb3	19.2115	20.0074	-0.795985	0.57595	DOWN	0.00524948	0.135991	2.2798833836352
2624	Q8C2B3	Hdac7	19.479	19.6242	-0.145138	0.904293	NOT	0.00525018	0.135991	2.27982564131296
7132	Q9D0I9	Rars1	20.4629	20.1365	0.326437	1.25391	UP	0.00525095	0.135991	2.27976219979067
2913	Q8BKI2	Tnrc6b	14.7507	14.8632	-0.112507	0.924979	NOT	0.00525693	0.135991	2.2792675580616
812	Q9ET78	Jph2	16.8568	17.3782	-0.52145	0.696671	DOWN	0.00530616	0.136715	2.27521982229441
8456	O08999	Ltbp2	18.6662	17.6387	1.02743	2.03839	UP	0.00531577	0.136715	2.27443398155144
1734	Q9Z2I8	Suclg2	19.6933	19.969	-0.275655	0.826075	DOWN	0.00535614	0.13729	2.27114775549037
429	Q9EQP2	Ehd4	23.4738	24.2357	-0.761875	0.589729	DOWN	0.00536907	0.13729	2.27010069116031
8863	P54987	Acod1	16.9727	11.107	5.86569	58.3109	UP	0.00540082	0.137581	2.26754013593704
6516	Q99J95	Cdk9	17.2926	17.0502	0.24238	1.18294	NOT	0.00541144	0.137581	2.26668723273828
231	P82347	Sgcd	18.655	19.7298	-1.07478	0.474743	DOWN	0.00545839	0.138378	2.26293519867951
8341	Q61233	Lcp1	24.5583	23.7562	0.802133	1.74368	UP	0.0054755	0.138416	2.2615762960182
8447	Q60767	Ly75	18.362	17.3559	1.00614	2.00852	UP	0.0056012	0.141192	2.25171868725231
7839	Q571I9	Aldh16a1	19.4689	18.982	0.48687	1.4014	UP	0.00564732	0.141526	2.24815791029453
7097	P49312	Hnrnpa1	22.3986	22.0766	0.322082	1.25013	UP	0.00565437	0.141526	2.24761546914604
8540	P10605	Ctsb	22.6659	21.3834	1.28248	2.43256	UP	0.00566231	0.141526	2.2470067410731
6773	Q61712	Dnajc1	17.5332	17.2572	0.276018	1.21085	UP	0.00568992	0.141816	2.24489422135654
1202	O35607	Bmpr2	15.6058	16.0013	-0.395435	0.76026	DOWN	0.00572301	0.142049	2.24237519169159
379	Q9WUP0	Ramp2	17.0965	17.9137	-0.817257	0.56752	DOWN	0.00573126	0.142049	2.24174996499729
399	Q61017	Gngt2	19.2469	20.0348	-0.787868	0.5792	DOWN	0.00582156	0.143841	2.23496024911322
5681	P70168	Kpnb1	21.138	20.9841	0.153888	1.11256	NOT	0.005836	0.143841	2.23388494002803
7857	P62911	Rpl32	21.2306	20.7385	0.492102	1.40649	UP	0.00585945	0.144019	2.23214329555969
8155	Q3TD49	Sppl2b	15.768	15.1378	0.630217	1.5478	UP	0.00591472	0.144784	2.22806573641529
8427	Q8BMK4	Ckap4	21.1266	20.1861	0.94052	1.91922	UP	0.00592321	0.144784	2.22744301636021
1428	Q99L43	Cds2	18.7521	19.0934	-0.34133	0.789313	DOWN	0.00594664	0.144842	2.22572806006527
8642	Q9JHF9	Ly96	13.8879	11.107	2.78085	6.87256	UP	0.00595822	0.144842	2.22488324636148
7319	P57784	Snrpa1	20.0822	19.7234	0.358743	1.28231	UP	0.00599525	0.145344	2.22219291956642
8776	Q80XD1	Chn2	15.4674	11.107	4.36034	20.5396	UP	0.00604834	0.146159	2.21836394709792
8559	Q5DTI8	Esyt3	18.7792	17.3701	1.40908	2.65568	UP	0.00608367	0.146159	2.21583463721251
8093	Q18PI6	Cd84	16.3874	15.7967	0.590762	1.50604	UP	0.00609371	0.146159	2.2151183602589
236	Q8K2I3	Fmo2	23.0918	24.1523	-1.0605	0.479467	DOWN	0.00612312	0.146159	2.21302708738789
1083	Q8CI15	Sphk1	17.0382	17.4642	-0.425997	0.744324	DOWN	0.00612521	0.146159	2.21287866260835
7053	Q8BHL3	Tbc1d10b	17.5079	17.1931	0.31478	1.24382	UP	0.00612773	0.146159	2.21270059145551
6477	Q9Z2X1	Hnrnpf	21.312	21.0739	0.238145	1.17948	NOT	0.00616869	0.146403	2.20980719495378
7828	P52480	Pkm	23.9801	23.4972	0.482945	1.39759	UP	0.00617412	0.146403	2.20942500417927
1134	Q8R370	Ushbp1	16.9304	17.3431	-0.41273	0.751201	DOWN	0.00619533	0.146403	2.20793548547302
7342	P49722	Psma2	20.6759	20.3117	0.364152	1.28713	UP	0.00620393	0.146403	2.20733
7594	P34884	Mif	21.3832	20.963	0.420175	1.33809	UP	0.00626679	0.147494	2.20295465035228
948	Q3UIL6	Plekha7	16.8454	17.3187	-0.473378	0.720276	DOWN	0.00631604	0.148104	2.19955526575357
126	Q9ER35	Fn3k	14.0406	15.6999	-1.65929	0.316595	DOWN	0.00632608	0.148104	2.19886545757351
340	Q8VDN4	Ccdc92	15.8321	16.7022	-0.870045	0.54713	DOWN	0.00634852	0.148238	2.19732757630558
114	Q9DBM0	Abcg8	18.8043	20.616	-1.81173	0.284849	DOWN	0.00637648	0.1485	2.19541906626013
8415	O88531	Ppt1	20.7368	19.8095	0.92725	1.90165	UP	0.00642701	0.149227	2.1919912270758
259	P00186	Cyp1a2	21.9258	22.9312	-1.00545	0.498113	DOWN	0.00645576	0.149227	2.19005282517961
7922	Q9QZE5	Copg1	20.8844	20.3681	0.516267	1.43025	UP	0.00645815	0.149227	2.1898917375808
7843	Q64310	Surf4	20.9985	20.5105	0.48802	1.40252	UP	0.00649638	0.14972	2.18732891361138
284	Q91VA0	Acsm1	16.9158	17.8733	-0.957492	0.514951	DOWN	0.0065203	0.149882	2.18573248845938
8030	P53996	Cnbp	19.6794	19.1199	0.559558	1.47382	UP	0.00657925	0.150847	2.18182374287754
178	Q64462	Cyp4b1	21.3999	22.6716	-1.27167	0.414181	DOWN	0.0066739	0.152444	2.17562050020997
453	Q8R0F9	Sec14l4	18.5255	19.2654	-0.739882	0.598788	DOWN	0.00670286	0.152444	2.17374011061928
6019	Q921Q3	Alg1	17.2054	17.0181	0.18725	1.13859	NOT	0.00671449	0.152444	2.17298690395875
65	O88632	Sema3f	10.2758	14.3863	-4.11048	0.0578924	DOWN	0.00672179	0.152444	2.17251538279289
6863	Q99M28	Rnps1	19.1773	18.8895	0.287735	1.22072	UP	0.00673481	0.152444	2.17167484538064
7790	P61750	Arf4	20.8928	20.4206	0.472278	1.3873	UP	0.00678554	0.153201	2.16841584105536
8491	P14434	H2-Aa	20.5572	19.4516	1.10553	2.15178	UP	0.00685608	0.154401	2.16392406015644
297	Q8BI08	Mal2	23.6616	24.6018	-0.940275	0.521134	DOWN	0.00687614	0.154461	2.16265547902523
218	Q64669	Nqo1	17.7181	18.8341	-1.11605	0.461356	DOWN	0.00695451	0.15505	2.15773346406055
7493	Q64378	Fkbp5	19.011	18.6096	0.401313	1.32071	UP	0.00696847	0.15505	2.15686275227035
7622	P56565	S100a1	18.9904	18.5617	0.428727	1.34605	UP	0.0069881	0.15505	2.15564113746359
8617	Q05915	Gch1	13.3958	11.107	2.2888	4.88649	UP	0.00701583	0.15505	2.15392081906427
192	P18872	Gnao1	17.8224	19.0213	-1.19891	0.435604	DOWN	0.0070179	0.15505	2.1537926388074
7298	Q8BGR2	Lrrc8d	17.0785	16.7226	0.355913	1.27979	UP	0.00704385	0.15505	2.15219002429384
6817	Q8VE37	Rcc1	19.6243	19.3425	0.28178	1.21569	UP	0.00705736	0.15505	2.15135797454036
6832	P46471	Psmc2	20.9224	20.6386	0.283807	1.2174	UP	0.00706716	0.15505	2.15075501472531
742	Q8BJD1	Itih5	16.7115	17.2661	-0.554605	0.680843	DOWN	0.00707313	0.15505	2.15038823696397
960	Q9JKK7	Tmod2	19.3882	19.8558	-0.46759	0.723172	DOWN	0.00707712	0.15505	2.15014374724346
28	Q8CA71	Shisa4	11.1296	16.5597	-5.43004	0.0231951	DOWN	0.00711472	0.15549	2.14784200378958
258	Q9QXV3	Ing1	13.426	14.4321	-1.00603	0.497915	DOWN	0.00719277	0.15564	2.14310370595964
902	P35283	Rab12	19.1121	19.6018	-0.489687	0.712179	DOWN	0.00719479	0.15564	2.1429819379997
8231	Q9CZE3	Rab32	19.8281	19.1357	0.692435	1.61601	UP	0.00722347	0.15564	2.14125406643114
1305	Q8BNW9	Kbtbd11	17.8509	18.2202	-0.36936	0.774126	DOWN	0.00724542	0.15564	2.13993649437138
287	P08074	Cbr2	26.0967	27.0512	-0.954538	0.516007	DOWN	0.00725433	0.15564	2.13940269221861
409	Q3UIJ9	Myzap	20.4307	21.208	-0.77731	0.583454	DOWN	0.00726117	0.15564	2.13899327571131
1331	Q02956	Prkcz	17.6127	17.9765	-0.363797	0.777116	DOWN	0.00726276	0.15564	2.13889836678541
2043	Q9CWD8	Nubpl	17.3862	17.6129	-0.226655	0.854614	NOT	0.00727494	0.15564	2.13817040507504
8594	P25085	Il1rn	17.714	15.974	1.73998	3.34031	UP	0.00732196	0.15564	2.13537241075083
8332	P16460	Ass1	20.8881	20.0974	0.790702	1.72992	UP	0.00736087	0.15564	2.13307073425546
298	Q9QXM0	Abhd2	16.4973	17.4343	-0.93702	0.522311	DOWN	0.00746087	0.15564	2.12721023614832
7478	P49138	Mapkapk2	18.0389	17.6416	0.397313	1.31705	UP	0.0074929	0.15564	2.12535023732571
281	Q0VDT2	Znf367	15.2531	16.217	-0.963843	0.51269	DOWN	0.0075667	0.15564	2.12109331215276
383	P97872	Fmo5	20.3494	21.1621	-0.812708	0.569312	DOWN	0.0075678	0.15564	2.12103012433628
4	D3YV10	Ccdc13	10.646	18.8013	-8.15529	0.00350762	DOWN	0.00759094	0.15564	2.11970449850572
8382	Q8K482	Emilin2	16.6517	15.7715	0.880167	1.84059	UP	0.00762636	0.15564	2.1176825839468
7537	Q3UMW8	Cln5	17.3696	16.9585	0.41111	1.32971	UP	0.00763222	0.15564	2.11734929022183
716	O55022	Pgrmc1	20.8806	21.4491	-0.568423	0.674354	DOWN	0.00764236	0.15564	2.11677245152002
7599	P02463	Col4a1	19.7004	19.2785	0.42187	1.33966	UP	0.00767344	0.15564	2.11500967197114
2515	Q03141	Mark3	18.2658	18.4235	-0.15777	0.89641	NOT	0.00767466	0.15564	2.11494091196913
323	O55103	Prx	21.4213	22.3238	-0.902555	0.534939	DOWN	0.00767637	0.15564	2.11484427022308
364	A3KG59	Pm20d2	10.2758	11.107	-0.831235	0.562048	DOWN	0.00768118	0.15564	2.11457211409666
365	P62325	Btg1	10.2758	11.107	-0.831235	0.562048	DOWN	0.00768118	0.15564	2.11457211409666
366	P70343	Casp4	10.2758	11.107	-0.831235	0.562048	DOWN	0.00768118	0.15564	2.11457211409666
367	Q11204	St3gal2	10.2758	11.107	-0.831235	0.562048	DOWN	0.00768118	0.15564	2.11457211409666
368	E9QA62	Lmod3	10.2758	11.107	-0.831235	0.562048	DOWN	0.00768118	0.15564	2.11457211409666
369	Q5MJS3	Fam20c	10.2758	11.107	-0.831235	0.562048	DOWN	0.00768118	0.15564	2.11457211409666
370	Q6NVG5	Mreg	10.2758	11.107	-0.831235	0.562048	DOWN	0.00768118	0.15564	2.11457211409666
371	Q8BV66	Ifi44	10.2758	11.107	-0.831235	0.562048	DOWN	0.00768118	0.15564	2.11457211409666
372	Q99MY8	Ash1l	10.2758	11.107	-0.831235	0.562048	DOWN	0.00768118	0.15564	2.11457211409666
373	Q9QZ49	Ubxn8	10.2758	11.107	-0.831235	0.562048	DOWN	0.00768118	0.15564	2.11457211409666
6418	Q9JMA1	Usp14	19.4156	19.184	0.231522	1.17407	NOT	0.00769159	0.15564	2.11398364801821
628	P48193	Epb41	20.0788	20.6897	-0.610988	0.654748	DOWN	0.00770043	0.15564	2.11348513549343
910	Q8BHC0	Lyve1	19.2544	19.7393	-0.484913	0.71454	DOWN	0.00771808	0.155642	2.11249049908181
7702	Q6ZQI3	Mlec	21.0248	20.5748	0.449997	1.36604	UP	0.00787077	0.156506	2.10398277839151
269	P48302	Ednrb	16.269	17.2572	-0.98818	0.504113	DOWN	0.00787717	0.156506	2.10362961636637
7819	Q9EPJ9	Arfgap1	18.2206	17.7409	0.479695	1.39445	UP	0.00791649	0.156506	2.10146738735062
7947	Q9QXC1	Fetub	19.7394	19.2164	0.52299	1.43693	UP	0.00793273	0.156506	2.10057749143847
7069	Q8R0F3	Sumf1	17.0126	16.6953	0.31732	1.24601	UP	0.008009	0.156506	2.09642170633695
7561	P70429	Evl	18.9882	18.5746	0.413605	1.33201	UP	0.00801927	0.156506	2.09586527237288
7647	O70194	Eif3d	19.9472	19.5132	0.433988	1.35096	UP	0.00803896	0.156506	2.09479991618609
356	Q8R3T5	Stxbp6	18.063	18.8993	-0.836275	0.560088	DOWN	0.00805852	0.156506	2.09374487357651
8399	P70698	Ctps1	20.0627	19.162	0.900698	1.86697	UP	0.0080609	0.156506	2.09361657423452
881	O35566	Cd151	19.2024	19.7024	-0.500032	0.707091	DOWN	0.00807365	0.156506	2.09293008157462
8187	Q61576	Fkbp10	19.5497	18.8942	0.655478	1.57514	UP	0.00811714	0.156506	2.09059690999075
8402	P04441	Cd74	21.3001	20.3872	0.912845	1.88275	UP	0.00812759	0.156506	2.09003837299545
7451	Q9D883	U2af1	21.0887	20.6958	0.392885	1.31302	UP	0.00813228	0.156506	2.08978778352609
16	Q5M9N4	Pigh	10.2758	16.7209	-6.4451	0.0114771	DOWN	0.00813321	0.156506	2.08973812083927
1246	Q08761	Pros1	16.8712	17.2549	-0.383673	0.766484	DOWN	0.00816134	0.156506	2.08823879520307
347	Q9DCX8	Iyd	16.9326	17.789	-0.856393	0.552332	DOWN	0.00819825	0.156506	2.08627889527985
7748	Q99K01	Pdxdc1	20.0998	19.6395	0.460315	1.37584	UP	0.00820111	0.156506	2.08612746886279
5299	Q9ESE1	Lrba	19.1401	19.0187	0.121345	1.08775	NOT	0.00820599	0.156506	2.08586917538187
6629	Q3THK7	Gmps	19.7506	19.4939	0.256642	1.1947	NOT	0.00821373	0.156506	2.08545947153593
277	Q70IV5	Synm	18.9053	19.8827	-0.977365	0.507907	DOWN	0.0082173	0.156506	2.08527080451417
471	O54754	Aox1	16.6487	17.3681	-0.719378	0.607359	DOWN	0.00823082	0.156506	2.08455715962632
6095	Q924C1	Xpo5	18.6207	18.4248	0.19585	1.1454	NOT	0.00826341	0.156506	2.08284054094576
6690	P70697	Urod	18.1219	17.856	0.2659	1.20239	UP	0.00826567	0.156506	2.08272214772206
346	Q8CGB6	Tns2	18.9779	19.8353	-0.85736	0.551962	DOWN	0.00827377	0.156506	2.08229655609209
6423	P34022	Ranbp1	20.7423	20.51	0.232253	1.17467	NOT	0.00828819	0.156506	2.08154040643613
8220	Q78IS1	Tmed3	16.9406	16.2595	0.681085	1.60335	UP	0.00829179	0.156506	2.08135191499815
6026	Q8VDM4	Psmd2	19.9077	19.7196	0.188095	1.13926	NOT	0.00830313	0.156506	2.08075790086051
5958	Q8R317	Ubqln1	19.6196	19.4389	0.180705	1.13344	NOT	0.00831776	0.156506	2.07999345825079
352	Q9R1Y5	Hic1	24.4143	25.2602	-0.845908	0.556361	DOWN	0.00832373	0.156506	2.07968185908108
7540	Q9CQC8	Spg21	18.4392	18.0277	0.411485	1.33005	UP	0.00834006	0.156506	2.07883087702607
5568	P56812	Pdcd5	20.1335	19.9893	0.144177	1.1051	NOT	0.00834229	0.156506	2.07871476906568
257	Q64444	Ca4	20.8045	21.8112	-1.00673	0.497673	DOWN	0.00838736	0.156506	2.07637450879355
7681	Q8BZN6	Dock10	18.36	17.9163	0.443763	1.36015	UP	0.00839716	0.156506	2.07586762338094
209	P60334	Cdo1	17.0243	18.1742	-1.14992	0.45065	DOWN	0.00840998	0.156506	2.07520508864864
8536	A1L314	Mpeg1	19.9804	18.7027	1.2777	2.42453	UP	0.00841522	0.156506	2.07493478377362
7943	Q99104	Myo5a	20.045	19.5241	0.520903	1.43485	UP	0.00844416	0.156506	2.07344354627168
8711	Q8R2R6	Mtg1	15.4968	11.7909	3.70591	13.0494	UP	0.00846006	0.156506	2.07262665953856
472	P15306	Thbd	21.4247	22.1432	-0.71853	0.607716	DOWN	0.00848823	0.156506	2.0711828611546
1127	Q4ACU6	Shank3	19.2323	19.6471	-0.414805	0.750121	DOWN	0.00852086	0.156506	2.06951651924077
7506	O35887	Calu	20.8514	20.4465	0.40496	1.32405	UP	0.00853706	0.156506	2.06869141190926
6947	Q99KW9	Itfg1	17.2546	16.9555	0.299125	1.2304	UP	0.00855086	0.156506	2.06799010246793
949	Q61735	Cd47	20.4325	20.9058	-0.47334	0.720295	DOWN	0.00855194	0.156506	2.0679353547778
6188	Q99LI7	Cstf3	18.3771	18.1697	0.207427	1.15463	NOT	0.00855895	0.156506	2.06757971366018
883	Q14B46	Rtkn2	17.4843	17.9834	-0.499107	0.707544	DOWN	0.00858063	0.156506	2.06648087517967
8833	P70266	Pfkfb1	17.7003	12.6344	5.06586	33.4947	UP	0.00862277	0.156506	2.06435304682817
7695	P10126	Eef1a1	25.1292	24.6825	0.446663	1.36288	UP	0.00862358	0.156506	2.06431220193262
8579	P28798	Grn	21.2818	19.7347	1.54709	2.92228	UP	0.00862741	0.156506	2.06411936115981
492	P24457	Cyp2d11	16.6599	17.3604	-0.70045	0.61538	DOWN	0.00863351	0.156506	2.06381260362218
7459	Q6DFZ1	Gbf1	18.8666	18.4729	0.393798	1.31385	UP	0.00863405	0.156506	2.06378528976165
1064	Q9CWU4		15.3224	15.7541	-0.431737	0.741368	DOWN	0.00864285	0.156506	2.06334282328708
598	P41588	Vipr2	16.5704	17.1974	-0.627012	0.647516	DOWN	0.00867406	0.156676	2.06177737781277
8552	P08101	Fcgr2	17.7243	16.3656	1.35864	2.56444	UP	0.00868755	0.156676	2.06110263288199
2014	P70335	Rock1	19.4001	19.6313	-0.23116	0.85195	NOT	0.00872712	0.156796	2.05912905233859
8189	P70677	Casp3	19.166	18.5075	0.658523	1.57847	UP	0.00872956	0.156796	2.05900784468545
165	P43023	Cox6a2	15.8768	17.2086	-1.33185	0.397258	DOWN	0.00875323	0.156904	2.05783180870044
7716	Q91YP3	Dera	18.7874	18.334	0.453468	1.36933	UP	0.00878046	0.156915	2.05648258283609
6074	P54728	Rad23b	20.4673	20.2743	0.193048	1.14318	NOT	0.00879118	0.156915	2.0559527288436
7539	O35166	Gosr2	17.3928	16.9814	0.411413	1.32999	UP	0.00882782	0.156915	2.05414633393707
8783	Q60848	Hells	16.2625	11.8471	4.41536	21.3381	UP	0.00883338	0.156915	2.05387298807268
651	O54931	Pakap	21.8176	22.4161	-0.598515	0.660433	DOWN	0.00885267	0.156915	2.05292587180008
5867	P12382	Pfkl	20.9945	20.8226	0.171868	1.12652	NOT	0.00887674	0.156915	2.05174630473281
8598	P02802	Mt1	15.9449	14.1308	1.81409	3.51637	UP	0.00887765	0.156915	2.05170193204701
6601	Q8VEH3	Arl8a	19.3011	19.0492	0.25188	1.19076	NOT	0.00892113	0.157202	2.04958003461924
295	Q8BGS3	Zkscan1	14.19	15.1332	-0.943175	0.520087	DOWN	0.00892932	0.157202	2.04918
7501	Q61830	Mrc1	19.7268	19.3237	0.403073	1.32232	UP	0.00899705	0.158081	2.04589996251742
212	Q8R4T1	Cys1	16.3764	17.5084	-1.13207	0.456259	DOWN	0.00903111	0.158366	2.04425862748787
391	Q9D9M2	Usp12	15.2039	16.0027	-0.7988	0.574827	DOWN	0.00910001	0.159189	2.04095798725866
362	P28843	Dpp4	19.956	20.7879	-0.8319	0.561789	DOWN	0.00914883	0.159189	2.03863448969129
7904	Q6A0D4	Rftn1	18.3087	17.7991	0.509583	1.42364	UP	0.0091801	0.159189	2.03715235140662
584	P35803	Gpm6b	18.4347	19.0698	-0.635065	0.643912	DOWN	0.00919366	0.159189	2.03651179756281
7504	Q9CSV6	Sft2d3	16.5609	16.1574	0.40346	1.32268	UP	0.00920914	0.159189	2.03578092471013
950	Q91YE8	Synpo2	18.6572	19.1303	-0.47306	0.720435	DOWN	0.00921504	0.159189	2.03550272815688
6860	P57716	Ncstn	19.8784	19.5917	0.2867	1.21985	UP	0.00923869	0.159189	2.03438941716527
6659	Q80TY0	Fnbp1	19.5055	19.2447	0.260815	1.19816	NOT	0.00926662	0.159189	2.0330788802344
6205	Q9DB05	Napa	20.652	20.4429	0.209168	1.15602	NOT	0.00927274	0.159189	2.03279210464875
6103	Q810A7	Ddx42	19.1067	18.9099	0.196825	1.14617	NOT	0.00928743	0.159189	2.03210430624189
7076	P47226	Tes	17.722	17.4038	0.318188	1.24676	UP	0.00930806	0.159189	2.03114096587632
7711	Q9ET30	Tm9sf3	20.3669	19.9143	0.45258	1.36849	UP	0.00932148	0.159189	2.03051517449379
133	O09161	Casq2	17.376	18.991	-1.61503	0.326459	DOWN	0.00932755	0.159189	2.03023250738159
7945	Q99JH8	Kdelr1	17.3047	16.7819	0.522815	1.43676	UP	0.00937365	0.159189	2.02809122017742
8283	P16110	Lgals3	21.703	20.9561	0.746838	1.67811	UP	0.00940573	0.159189	2.02660730753398
5239	Q9D7I5	Lhpp	16.4994	16.3851	0.114267	1.08243	NOT	0.00940928	0.159189	2.02644346913463
1157	Q8QZT1	Acat1	21.8728	22.2786	-0.40588	0.754776	DOWN	0.00946381	0.159189	2.02393384972739
8395	P06797	Ctsl	18.6926	17.7983	0.894345	1.85877	UP	0.00947121	0.159189	2.02359430463468
6875	Q8BQ30	Ppp1r18	19.2569	18.968	0.288985	1.22178	UP	0.00947514	0.159189	2.02341436439121
1295	Q9CWU6	Uqcc1	16.5629	16.9351	-0.372225	0.77259	DOWN	0.0094757	0.159189	2.02338869746458
5818	Q9D1G1	Rab1b	20.8381	20.6709	0.167208	1.12288	NOT	0.00947783	0.159189	2.02329126861968
8213	P09528	Fth1	19.8209	19.147	0.67392	1.5954	UP	0.00948546	0.159189	2.02294169460446
1523	Q8BFP9	Pdk1	18.5075	18.8248	-0.31724	0.802604	DOWN	0.00949067	0.159189	2.02270294414945
6467	Q8CH25	Sltm	18.3963	18.1588	0.237508	1.17895	NOT	0.0095288	0.159526	2.02096192509516
808	Q61469	Plpp1	17.7122	18.2344	-0.522175	0.696321	DOWN	0.00954873	0.159559	2.02005443208343
1729	Q9D684	Rin2	15.8598	16.1361	-0.276288	0.825713	DOWN	0.009644	0.159614	2.01574297842506
6671	Q9JKC8	Ap3m1	19.0517	18.7894	0.262313	1.1994	NOT	0.00968296	0.159614	2.01399181734832
8541	P28667	Marcksl1	17.8125	16.527	1.28554	2.43772	UP	0.00972808	0.159614	2.01197277729858
6117	Q9D554	Sf3a3	19.3725	19.1749	0.197623	1.14681	NOT	0.00975173	0.159614	2.01091837624119
7804	P47915	Rpl29	19.2572	18.7815	0.475705	1.3906	UP	0.00976145	0.159614	2.01048575489832
6643	Q7TMK9	Syncrip	21.797	21.5386	0.258362	1.19612	NOT	0.00976587	0.159614	2.01028897225525
7642	Q9JIF7	Copb1	21.3434	20.9105	0.4329	1.34994	UP	0.00978081	0.159614	2.00962504431884
518	Q9DAK2	Pacrg	16.997	17.6774	-0.680395	0.623994	DOWN	0.00979104	0.159614	2.00917130824516
797	O08740	Polr2j	17.1452	17.674	-0.528865	0.6931	DOWN	0.00980382	0.159614	2.00860471537455
8610	Q80YX1	Tnc	19.2588	17.2985	1.96029	3.8914	UP	0.0098046	0.159614	2.00857007532859
952	Q9WTQ5	Akap12	19.6351	20.1067	-0.471655	0.721137	DOWN	0.00983319	0.159614	2.00730565751416
210	P31428	Dpep1	21.1946	22.3328	-1.1382	0.454324	DOWN	0.00983386	0.159614	2.0072759346832
374	O35945	Aldh1a7	23.6258	24.449	-0.823257	0.565164	DOWN	0.00983577	0.159614	2.00719150290862
674	A2A6T1	Cdr2l	15.2118	15.7976	-0.58585	0.666257	DOWN	0.009847	0.159614	2.00669592976782
7187	Q61247	Serpinf2	19.4638	19.1285	0.335288	1.26163	UP	0.00986449	0.159614	2.0059254511665
385	P15626	Gstm2	23.5237	24.332	-0.808257	0.571071	DOWN	0.00987796	0.159614	2.00533260491328
8715	Q91X79	Cela1	15.8303	12.0956	3.7347	13.3124	UP	0.0098857	0.159614	2.0049924413564
580	P54265	Dmpk	18.8063	19.4487	-0.642335	0.640675	DOWN	0.00988948	0.159614	2.00482663132522
6	O09165	Casq1	11.7567	19.4423	-7.6855	0.00485773	DOWN	0.00991064	0.159614	2.0039
276	Q91VC7	Ppp1r14a	19.6506	20.6299	-0.979267	0.507237	DOWN	0.00993243	0.159614	2.00294466190425
6734	P62196	Psmc5	19.8341	19.5628	0.271305	1.2069	UP	0.00993516	0.159614	2.00282522186242
8426	P23780	Glb1	20.6799	19.7412	0.938732	1.91684	UP	0.00994967	0.159614	2.00219149782629
6585	Q80W00	Ppp1r10	15.8743	15.6236	0.250607	1.18971	NOT	0.00997944	0.159614	2.00089382862581
1129	Q8C0N2	Gpat3	16.2025	16.6172	-0.414768	0.75014	DOWN	0.00998724	0.159614	2.00055447012895
7222	Q61092	Lamc2	18.2157	17.8739	0.341815	1.26735	UP	0.0100357	0.159614	1.9984525460252
6479	P70441	Nherf1	21.1658	20.9276	0.23825	1.17956	NOT	0.0100367	0.159614	1.99841065786649
6552	Q60739	Bag1	18.1986	17.9515	0.247085	1.18681	NOT	0.0100388	0.159614	1.99831754907689
170	Q5FW53	Mybphl	17.9027	19.2011	-1.2984	0.406576	DOWN	0.0100585	0.159614	1.9974653980893
8703	P01637		15.0103	11.4117	3.59856	12.1136	UP	0.0100737	0.159614	1.99681059879492
5074	Q61598	Gdi2	22.692	22.594	0.098035	1.07031	NOT	0.0101566	0.160335	1.99325105250572
301	P23927	Cryab	19.0847	20.0161	-0.931492	0.524316	DOWN	0.01016	0.160335	1.99310565086977
308	O35659	Glp1r	16.0148	16.9387	-0.923893	0.527085	DOWN	0.0102071	0.160335	1.99109741763956
6981	P63073	Eif4e	20.1176	19.8127	0.304905	1.23534	UP	0.0102186	0.160335	1.99060736816173
6271	Q9JII5	Dazap1	19.666	19.4499	0.216075	1.16157	NOT	0.0102196	0.160335	1.99056503995656
414	Q8BZF8	Pgm5	19.3347	20.1069	-0.772203	0.585523	DOWN	0.0102276	0.160335	1.99022456699348
8738	Q8R5A0	Smyd2	15.0812	11.107	3.97413	15.7156	UP	0.010283	0.160867	1.98788007972706
753	Q8BWR2	Pithd1	17.4726	18.0218	-0.54917	0.683413	DOWN	0.0102978	0.160867	1.98725647494947
183	P97501	Fmo3	18.3346	19.5843	-1.24973	0.420527	DOWN	0.010356	0.161125	1.98480783242766
452	Q8BGV0	Nars2	15.4294	16.1703	-0.740845	0.598389	DOWN	0.0103864	0.161125	1.9835357503754
6951	Q9Z2U0	Psma7	19.754	19.4538	0.300195	1.23131	UP	0.0103891	0.161125	1.98342178080083
2366	Q8K4X7	Agpat4	19.0839	19.2632	-0.17932	0.883119	NOT	0.0103898	0.161125	1.98339456798552
223	P52430	Pon1	20.5224	21.6267	-1.10421	0.465157	DOWN	0.0104141	0.161125	1.98237721382333
8530	Q8BG92	Clvs2	16.9636	15.7076	1.25601	2.38834	UP	0.0104398	0.161125	1.98130973483005
8238	Q99JF5	Mvd	17.7188	17.0222	0.696603	1.62068	UP	0.0104786	0.161125	1.97969512128107
961	Q8VCA6	Tmem161a	16.7575	17.2234	-0.46587	0.724034	DOWN	0.0104917	0.161125	1.97915376358748
152	Q9QXL1	Kif21b	22.0657	23.5119	-1.44621	0.366984	DOWN	0.0104982	0.161125	1.97888685390549
5802	B2RY56	Rbm25	18.0271	17.8612	0.165875	1.12185	NOT	0.0105	0.161125	1.97880896375561
1696	Q60738	Slc30a1	16.8613	17.1466	-0.285285	0.820579	DOWN	0.0105506	0.161125	1.97672267720435
8533	Q9WUU7	Ctsz	22.1808	20.9136	1.26716	2.40686	UP	0.0105696	0.161125	1.97594
5813	P35831	Ptpn12	19.9979	19.8311	0.166793	1.12256	NOT	0.010575	0.161125	1.97572143095027
762	Q8BY89	Slc44a2	20.8904	21.4352	-0.544805	0.685484	DOWN	0.0105836	0.161125	1.9753658027185
7894	P27773	Pdia3	24.8098	24.303	0.506853	1.42095	UP	0.0105987	0.161125	1.97474715467525
940	Q8K274	Fn3krp	18.2073	18.6834	-0.476175	0.718881	DOWN	0.0106109	0.161125	1.97424761463898
1326	Q8BXK8	Agap1	16.6653	17.0305	-0.365202	0.77636	DOWN	0.010623	0.161125	1.9737519599912
6325	Q9ER73	Elp4	17.2777	17.0551	0.222603	1.16684	NOT	0.0106881	0.161627	1.97109750046857
683	Q9JJA7	Ccnl2	15.9587	16.5395	-0.58081	0.668588	DOWN	0.0107212	0.161627	1.96975457691429
5762	Q8BIJ7	Rufy1	19.3394	19.1769	0.16248	1.11921	NOT	0.0107274	0.161627	1.9695069017148
1010	Q91YP0	L2hgdh	17.3407	17.7919	-0.45119	0.731439	DOWN	0.0107749	0.161627	1.96758784002795
318	P50285	Fmo1	21.2969	22.206	-0.909045	0.532537	DOWN	0.0107797	0.161627	1.96739312399392
7362	Q99LC8	Eif2b1	17.1012	16.7313	0.369833	1.2922	UP	0.0108095	0.161627	1.96619551909819
2899	Q5SV85	Synrg	17.7632	17.8764	-0.11326	0.924497	NOT	0.0108278	0.161627	1.96545961423224
7923	P28867	Prkcd	20.2777	19.7614	0.516328	1.43031	UP	0.0108319	0.161627	1.96529467644513
7566	O70310	Nmt1	19.9961	19.5807	0.41536	1.33363	UP	0.010862	0.161627	1.96408964178287
6415	P62192	Psmc1	20.7072	20.4758	0.231403	1.17398	NOT	0.0108635	0.161627	1.9640291119377
8581	P08508	Fcgr3	18.4588	16.9026	1.5562	2.94078	UP	0.0108737	0.161627	1.96362229367984
637	Q9DC07	Nebl	20.7175	21.3247	-0.607285	0.656431	DOWN	0.0108747	0.161627	1.96358255533113
6558	Q60972	Rbbp4	20.9965	20.7483	0.248122	1.18766	NOT	0.0109279	0.161755	1.9614618571223
7696	Q9R1Q6	Tmem176b	18.8232	18.3761	0.44711	1.36331	UP	0.0109545	0.161755	1.96040648881662
5618	Q9R0N0	Galk1	20.8654	20.7165	0.148943	1.10876	NOT	0.0109879	0.161755	1.95908660603303
7780	Q9CXY9	Pigk	18.8406	18.3711	0.469502	1.38463	UP	0.0109882	0.161755	1.95907447205439
8663	A2APB8	Tpx2	14.2097	11.107	3.10263	8.58982	UP	0.0109896	0.161755	1.95901949791669
456	P82349	Sgcb	17.6473	18.3828	-0.735528	0.600598	DOWN	0.0109961	0.161755	1.95876246464444
2021	Q6ZPJ3	Ube2o	17.891	18.1212	-0.230208	0.852512	NOT	0.0110341	0.161755	1.95726273019659
5292	Q8BFY9	Tnpo1	19.6633	19.5429	0.12043	1.08706	NOT	0.011044	0.161755	1.95687289420098
882	O08967	Cyth3	18.1611	18.6611	-0.500015	0.707099	DOWN	0.0110474	0.161755	1.95674027474707
138	P13541	Myh3	19.8071	21.3639	-1.55679	0.339906	DOWN	0.0111158	0.162097	1.95405990094824
2	P13412	Tnni2	11.8588	20.2975	-8.43869	0.00288204	DOWN	0.0111241	0.162097	1.95373456913211
6356	Q3UYV9	Ncbp1	18.6401	18.4147	0.225345	1.16906	NOT	0.0111255	0.162097	1.95367851013932
1958	Q5XPI3	Rnf123	16.8961	17.1367	-0.240585	0.846402	NOT	0.0111705	0.162486	1.95192548204899
7705	P43883	Plin2	18.5038	18.0535	0.450317	1.36634	UP	0.0112857	0.162932	1.94747196024632
966	Q8BGT1	Flrt3	17.7776	18.2406	-0.46299	0.725481	DOWN	0.0113154	0.162932	1.94632893768107
6670	Q9WVA3	Bub3	20.2917	20.0298	0.261945	1.19909	NOT	0.0113243	0.162932	1.94599039808817
1528	Q5DTX6	Jcad	18.6904	19.0068	-0.31642	0.80306	DOWN	0.0113306	0.162932	1.94574770519035
358	Q61391	Mme	19.6217	20.4559	-0.834252	0.560874	DOWN	0.0113333	0.162932	1.94564185228973
7670	Q8BYW1	Arhgap25	19.6384	19.1978	0.44054	1.35711	UP	0.0113355	0.162932	1.94555836090818
7653	Q8CIE6	Copa	21.7776	21.3412	0.43641	1.35323	UP	0.0113428	0.162932	1.9452802615082
1240	Q78J03	Msrb2	17.8439	18.2298	-0.385842	0.765332	DOWN	0.0113482	0.162932	1.94507435827726
1046	Q3UTQ8	Cdkl5	16.1048	16.5448	-0.43998	0.737145	DOWN	0.011395	0.16326	1.94328433654034
6923	Q921H8	Acaa1a	19.8103	19.5139	0.2964	1.22808	UP	0.0114225	0.16326	1.94223704629054
104	Q5SX40	Myh1	21.4787	23.6129	-2.1342	0.227794	DOWN	0.0114262	0.16326	1.94209943276554
6785	Q9JKY5	Hip1r	19.8868	19.609	0.277885	1.21242	UP	0.0114479	0.163307	1.94127470400522
1583	Q62415	Ppp1r13b	16.1289	16.4351	-0.306208	0.808765	DOWN	0.0115008	0.163315	1.93927372372997
7554	Q91VX9	Tmem168	17.4091	16.9964	0.412712	1.33119	UP	0.0115073	0.163315	1.93902648904291
5727	O88271	Cfdp1	18.0222	17.8648	0.15739	1.11527	NOT	0.011533	0.163315	1.93805650295985
1553	Q80SZ7	Gng5	20.1831	20.4956	-0.31248	0.805256	DOWN	0.0115339	0.163315	1.9380252491274
384	Q63918	Cavin2	22.9921	23.8033	-0.811198	0.569909	DOWN	0.0115633	0.163315	1.93691824436731
6206	Q8N7N5	Dcaf8	18.6321	18.4229	0.209198	1.15604	NOT	0.0115745	0.163315	1.93649828603961
60	Q7TSG1	Cep120	11.3217	15.5742	-4.25256	0.0524629	DOWN	0.01162	0.163315	1.93479562856203
1171	Q6PD03	Ppp2r5a	19.2364	19.6385	-0.402162	0.756723	DOWN	0.0116653	0.163315	1.93310241251698
197	P10648	Gsta2	17.7214	18.9079	-1.1865	0.439366	DOWN	0.0116668	0.163315	1.93304742808706
5650	Q9JMH6	Txnrd1	20.8618	20.7102	0.151528	1.11074	NOT	0.0116955	0.163315	1.93198276633212
8462	O70456	Sfn	20.1663	19.1273	1.03905	2.05487	UP	0.0117281	0.163315	1.93077208045042
191	Q8K2W9		17.7966	19.0022	-1.20565	0.433575	DOWN	0.0117437	0.163315	1.93019383123121
8107	P27046	Man2a1	19.5639	18.9689	0.595005	1.51048	UP	0.0117476	0.163315	1.93005258694722
326	Q9EQF6	Dpysl5	15.9393	16.8393	-0.900015	0.535881	DOWN	0.0117494	0.163315	1.92998264736077
7414	P16858	Gapdh	24.8744	24.4957	0.378692	1.30016	UP	0.0117817	0.163315	1.92879340388262
8171	Q922F4	Tubb6	19.7072	19.0602	0.646998	1.56591	UP	0.0117906	0.163315	1.92846273111256
7224	Q9CPT4	Mydgf	19.6978	19.3555	0.34223	1.26771	UP	0.0117945	0.163315	1.92832186450794
8319	Q9D3P8	Plgrkt	18.7248	17.9491	0.775632	1.71194	UP	0.0118078	0.163315	1.92783167356567
8197	Q9CYL5	Glipr2	19.984	19.3218	0.662225	1.58252	UP	0.0118308	0.163315	1.92698574050321
129	Q9JKS4	Ldb3	17.7972	19.4457	-1.64848	0.318975	DOWN	0.0118309	0.163315	1.92698324431277
6212	Q6GQT9	Nomo1	19.9368	19.7271	0.20968	1.15643	NOT	0.011835	0.163315	1.9268323615635
7674	P58058	Nadk	17.6658	17.2239	0.441897	1.35839	UP	0.0118565	0.163359	1.92604265189137
1972	Q6ZWR6	Syne1	18.3553	18.5937	-0.238462	0.847648	NOT	0.0119524	0.164391	1.9225449901567
221	Q62000	Ogn	20.8985	22.0081	-1.10962	0.463417	DOWN	0.0119685	0.164391	1.92195882441531
1619	P21619	Lmnb2	21.5793	21.8778	-0.29853	0.81308	DOWN	0.0120697	0.165285	1.91830240898446
7	Q64356	Svs6	11.4705	18.8581	-7.38767	0.00597158	DOWN	0.0120708	0.165285	1.91826275850079
8145	Q9Z0M5	Lipa	19.4892	18.8656	0.623552	1.54066	UP	0.01211	0.165324	1.91685560581975
7186	Q8CGC7	Eprs1	19.9484	19.6136	0.334817	1.26122	UP	0.0121331	0.165324	1.91602890305801
7697	Q8K124	Plekho2	19.1012	18.6529	0.448257	1.36439	UP	0.0121563	0.165324	1.91519726884121
6487	Q8VCM8	Ncln	18.8023	18.5632	0.23907	1.18023	NOT	0.012164	0.165324	1.91492241032185
237	Q8VCC1	Hpgd	19.4091	20.4695	-1.06031	0.479527	DOWN	0.0121668	0.165324	1.9148220246236
5904	Q6NVF9	Cpsf6	20.0038	19.8291	0.174778	1.12879	NOT	0.0122011	0.165536	1.91360090660718
6631	P61979	Hnrnpk	23.5603	23.3035	0.256717	1.19476	NOT	0.012238	0.165631	1.91228838005761
1302	A2AQ25	Skt	19.2345	19.6049	-0.370375	0.773581	DOWN	0.0122455	0.165631	1.91202432853392
8352	Q64277	Bst1	19.6673	18.8447	0.822608	1.7686	UP	0.0123134	0.166265	1.90962158903043
1025	Q3UHC7	Dab2ip	17.66	18.1071	-0.447095	0.733518	DOWN	0.0123298	0.166265	1.90904439065664
121	Q8K341	Atat1	14.3138	15.9883	-1.67455	0.313264	DOWN	0.0123649	0.166485	1.90780995357654
1142	Q9D3N8	Grtp1	16.3326	16.7428	-0.4102	0.752519	DOWN	0.0124763	0.167402	1.90391332068403
934	Q9DCW2	Plscr2	17.3057	17.7844	-0.478685	0.717631	DOWN	0.0124813	0.167402	1.90374066513995
8137	Q6ZWY8	Tmsb10	22.189	21.5687	0.62032	1.53722	UP	0.0124896	0.167402	1.90345077494962
8392	Q91W64	Cyp2c70	18.4399	17.5489	0.891055	1.85453	UP	0.0125891	0.167461	1.90000631710896
1646	Q9JJ00	Plscr1	19.1448	19.4378	-0.293007	0.816199	DOWN	0.0126023	0.167461	1.89955097875602
6211	P70460	Vasp	20.8641	20.6547	0.209368	1.15618	NOT	0.012604	0.167461	1.89949008939808
8476	Q05020	Apoc2	15.3802	14.3127	1.06746	2.09574	UP	0.0126182	0.167461	1.89900410765437
6066	G5E870	Trip12	18.9447	18.7523	0.192472	1.14272	NOT	0.0126245	0.167461	1.89878725817263
7598	Q8K2Q9	Shtn1	19.2291	18.8073	0.421805	1.3396	UP	0.0126582	0.167461	1.89762804673935
523	Q9D081	Alg14	16.4521	17.1291	-0.677028	0.625453	DOWN	0.0126675	0.167461	1.89730922417392
7844	Q80YW0	Cyth4	18.5239	18.0353	0.48868	1.40316	UP	0.0126996	0.167461	1.89621067597376
74	Q9QZ47	Tnnt3	15.0959	18.7725	-3.67664	0.0782029	DOWN	0.0127046	0.167461	1.89603862798786
757	Q02013	Aqp1	22.4507	22.9982	-0.547462	0.684223	DOWN	0.0127523	0.167461	1.89441059351765
8688	Q8BH75	Rnf41	15.373	11.9472	3.42574	10.7461	UP	0.0127665	0.167461	1.89392747006356
427	Q08857	Cd36	23.1304	23.8931	-0.762633	0.58942	DOWN	0.0127823	0.167461	1.89339072198627
7553	Q8K330	Ssh3	16.7183	16.3056	0.41267	1.33115	UP	0.0128043	0.167461	1.89264514266918
7484	Q9R099	Tbl2	18.6462	18.2469	0.399225	1.3188	UP	0.0128076	0.167461	1.89253095598134
1480	P14152	Mdh1	23.7676	24.0978	-0.33021	0.795421	DOWN	0.0128178	0.167461	1.89218674630193
7170	Q9QY06	Myo9b	17.9305	17.5987	0.3318	1.25858	UP	0.0128489	0.167461	1.89113269888048
607	Q61496	Ddx4	21.8555	22.4778	-0.622328	0.649622	DOWN	0.0128623	0.167461	1.89068234434393
7782	P47963	Rpl13	22.7559	22.2858	0.470125	1.38523	UP	0.0128683	0.167461	1.89047970037955
7207	Q8C561	Lmbrd2	17.8308	17.492	0.338797	1.2647	UP	0.012872	0.167461	1.89035548718791
1869	Q9Z2M6	Ubl3	18.3049	18.5605	-0.255648	0.837611	NOT	0.0128868	0.167461	1.88985528228222
531	P08032	Spta1	21.0406	21.7131	-0.672462	0.627435	DOWN	0.0128903	0.167461	1.88973653706689
6623	P59999	Arpc4	23.3748	23.1188	0.256057	1.19421	NOT	0.0129295	0.167574	1.88841843745498
6596	Q99L04	Dhrs1	20.0773	19.826	0.251287	1.19027	NOT	0.0129368	0.167574	1.88817239734389
8147	P97372	Psme2	21.9085	21.2844	0.624065	1.54121	UP	0.0129859	0.167746	1.88652744415168
494	Q922J6	Tspan2	17.9669	18.6656	-0.698743	0.616109	DOWN	0.0129962	0.167746	1.88618257794157
502	P02088	Hbb-b1	28.5555	29.2492	-0.693705	0.618264	DOWN	0.0130462	0.167746	1.88451709979595
5697	Q9CPR7	Sike1	17.2169	17.0621	0.15482	1.11328	NOT	0.0130658	0.167746	1.88386392742272
5800	Q922Q1	Mtarc2	20.5427	20.3771	0.165603	1.12163	NOT	0.0131097	0.167746	1.88240714712931
614	P55284	Cdh5	20.4582	21.0762	-0.618012	0.651568	DOWN	0.0131485	0.167746	1.88112382232435
765	Q7TQF7	Amph	18.8699	19.4132	-0.54332	0.68619	DOWN	0.0131875	0.167746	1.87983858119257
4974	Q61510	Trim25	18.8396	18.7497	0.0898675	1.06427	NOT	0.0132138	0.167746	1.87897085755788
8425	P27870	Vav1	20.1479	19.2092	0.93864	1.91672	UP	0.013221	0.167746	1.87873658168994
7275	Q9CY58	Serbp1	21.1267	20.7757	0.350988	1.27543	UP	0.0132569	0.167746	1.87755674206038
99	P97443	Smyd1	15.3989	17.6809	-2.28201	0.205611	DOWN	0.0132908	0.167746	1.87644799495176
6583	Q8BKC5	Ipo5	20.667	20.4165	0.250503	1.18962	NOT	0.0133022	0.167746	1.87607662473376
767	Q9JLB2	Pals1	18.1353	18.6777	-0.542377	0.686638	DOWN	0.0133052	0.167746	1.87597950681962
6135	Q8K0Q5	Arhgap18	18.3034	18.1041	0.199247	1.1481	NOT	0.0133813	0.167746	1.87350045929133
6872	Q61687	Atrx	18.1707	17.8819	0.288728	1.22156	UP	0.0134035	0.167746	1.8727824617546
8023	Q5XJY5	Arcn1	21.5079	20.9521	0.555837	1.47002	UP	0.0134155	0.167746	1.8723918738662
524	E9Q0S6	Tns1	22.055	22.7317	-0.676695	0.625597	DOWN	0.013426	0.167746	1.87205248377562
6975	P38060	Hmgcl	18.224	17.9197	0.304343	1.23486	UP	0.01345	0.167746	1.8712790072456
7446	P99026	Psmb4	20.5633	20.173	0.390295	1.31066	UP	0.01345	0.167746	1.87127613347638
8424	Q9QUH0	Glrx	20.6031	19.6649	0.938165	1.91609	UP	0.0134612	0.167746	1.87091651352621
8496	Q571E4	Galns	18.9806	17.8616	1.11905	2.17204	UP	0.0134666	0.167746	1.87074149134166
7984	B1AVH7	Tbc1d2	16.5455	16.0056	0.539952	1.45392	UP	0.0134744	0.167746	1.87049017758665
278	A2ARA8	Itga8	19.8132	20.7865	-0.973265	0.509352	DOWN	0.013476	0.167746	1.87043880432743
7753	Q62393	Tpd52	20.436	19.9746	0.461398	1.37687	UP	0.0134855	0.167746	1.87013185168335
7423	Q08874	Mitf	17.3935	17.0114	0.382103	1.30324	UP	0.0134874	0.167746	1.87007263169987
1532	P13597	Icam1	22.9532	23.2689	-0.315707	0.803457	DOWN	0.0135425	0.167746	1.86830038608535
7194	Q9QXY9	Pex3	17.0908	16.7543	0.336525	1.26271	UP	0.0135483	0.167746	1.8681150350621
8453	Q80VJ3	Dnph1	15.2048	14.1829	1.02186	2.03054	UP	0.0135724	0.167746	1.86734190957244
467	Q9CZ57	Nsun4	11.7106	12.4354	-0.724855	0.605058	DOWN	0.013579	0.167746	1.86713198780135
875	Q9JI33	Ntn4	19.313	19.8143	-0.501235	0.706502	DOWN	0.0135848	0.167746	1.86694636739902
8542	Q05117	Acp5	17.9269	16.6354	1.29147	2.44778	UP	0.0135855	0.167746	1.86692488468187
573	P35918	Kdr	16.1358	16.7813	-0.645513	0.639266	DOWN	0.0136238	0.167746	1.86570091170741
489	P26618	Pdgfra	16.3111	17.0131	-0.70197	0.614732	DOWN	0.0136413	0.167746	1.86514529056267
8327	Q8K4B4	Il23r	16.4619	15.6768	0.7851	1.72321	UP	0.0136484	0.167746	1.86491956254903
328	P70694	Akr1c6	12.22	13.1115	-0.891517	0.539047	DOWN	0.0136751	0.167746	1.86407085477633
583	Q8BL99	Dop1a	14.7278	15.3661	-0.638338	0.642453	DOWN	0.0137264	0.167746	1.8624442037813
575	P10637	Mapt	20.0538	20.6988	-0.644983	0.639501	DOWN	0.0137329	0.167746	1.86223761587188
7229	Q9CPW4	Arpc5	22.019	21.6761	0.342875	1.26828	UP	0.0137641	0.167746	1.86125120263739
8309	Q3UPH1	Prrc1	19.5719	18.8045	0.767435	1.70224	UP	0.0137666	0.167746	1.86117450497575
8351	O35902	Dsg3	15.375	14.5533	0.82172	1.76751	UP	0.0138016	0.167746	1.86006924192357
1080	P40630	Tfam	18.9089	19.3352	-0.42627	0.744183	DOWN	0.0138079	0.167746	1.85987368788998
184	P40936	Inmt	24.5093	25.7573	-1.24796	0.421042	DOWN	0.0138143	0.167746	1.85967174557741
476	Q02357	Ank1	19.201	19.9154	-0.714437	0.609443	DOWN	0.0138435	0.167746	1.85875525571279
448	P52196	Tst	21.3679	22.1109	-0.74304	0.597479	DOWN	0.0138449	0.167746	1.85870964349732
7009	Q8BHD7	Ptbp3	21.2668	20.958	0.308815	1.23869	UP	0.0138552	0.167746	1.85838710675407
8263	Q09200	B4galnt1	18.3866	17.6595	0.727097	1.65531	UP	0.0138577	0.167746	1.85830937754767
1857	P26041	Msn	23.8099	24.0667	-0.256873	0.8369	NOT	0.013894	0.167746	1.85717326810063
8444	Q99N69	Lpxn	17.0393	16.0361	1.00315	2.00438	UP	0.0139057	0.167746	1.85680614486574
667	Q61879	Myh10	23.6684	24.2563	-0.58791	0.665306	DOWN	0.0139064	0.167746	1.85678509546056
7764	O54734	Ddost	22.8718	22.4073	0.464502	1.37984	UP	0.0139134	0.167746	1.85656807125324
827	Q8BS45	Ift56	16.1459	16.6652	-0.519295	0.697713	DOWN	0.0139143	0.167746	1.85653951118791
8359	Q62426	Cstb	21.8447	20.9992	0.845448	1.79682	UP	0.0139539	0.167835	1.85530591875284
7669	Q80ZQ9	Abitram	17.4891	17.0485	0.440522	1.3571	UP	0.0139709	0.167835	1.85477421704938
7463	Q8CGF5	Tlcd4	16.4366	16.0425	0.394045	1.31407	UP	0.0139784	0.167835	1.8545423807518
229	P24549	Aldh1a1	23.5253	24.6061	-1.08075	0.472781	DOWN	0.0140358	0.168297	1.85276304538828
7307	Q8R242	Ctbs	17.7335	17.3765	0.35697	1.28073	UP	0.0141168	0.168907	1.85026472257835
6680	P35564	Canx	22.0629	21.7993	0.263613	1.20048	UP	0.0141268	0.168907	1.84995629554076
1346	Q99PL6	Ubxn6	18.5632	18.9233	-0.36009	0.779116	DOWN	0.0141438	0.168907	1.84943315648148
611	Q63961	Eng	19.6387	20.2595	-0.620727	0.650343	DOWN	0.014197	0.169045	1.84780265290193
5743	P62821	Rab1A	21.9399	21.7804	0.15946	1.11687	NOT	0.0142141	0.169045	1.84727922803326
819	P53657	Pklr	16.8215	17.3414	-0.519912	0.697414	DOWN	0.0142177	0.169045	1.84716967635185
8297	Q9R060	Nubp1	17.6169	16.8582	0.758637	1.69189	UP	0.0143109	0.169045	1.8443317177099
8269	Q6PGH2	Jpt2	17.9999	17.2687	0.731125	1.65993	UP	0.0143189	0.169045	1.84409104151335
769	Q9JMA9	Slc6a14	17.4199	17.9617	-0.54188	0.686875	DOWN	0.0143253	0.169045	1.84389715346589
779	P56857	Cldn18	21.1225	21.6581	-0.535567	0.689887	DOWN	0.014334	0.169045	1.84363393298958
7578	Q99KQ4	Nampt	20.4851	20.0671	0.41804	1.33611	UP	0.0143453	0.169045	1.84329084941088
8870	P03977		19.0973	12.5745	6.52279	91.9508	UP	0.0143532	0.169045	1.84304990197701
5804	Q8VEK3	Hnrnpu	22.9255	22.7593	0.166128	1.12204	NOT	0.0143672	0.169045	1.8426283764368
6342	P54775	Psmc4	19.8058	19.5815	0.224325	1.16823	NOT	0.0143816	0.169045	1.8421938515135
1242	Q9CXS4	Cenpv	18.8577	19.2428	-0.3851	0.765726	DOWN	0.014384	0.169045	1.84212153332799
5124	Q6PDG5	Smarcc2	19.81	19.7061	0.103877	1.07466	NOT	0.0144774	0.169655	1.83930807628178
7734	P62702	Rps4x	22.3405	21.883	0.457412	1.37308	UP	0.0145396	0.169655	1.83744736200135
1247	P26043	Rdx	25.0825	25.4659	-0.383387	0.766635	DOWN	0.0145603	0.169655	1.83683113828017
2545	Q99KH8	Stk24	19.7385	19.893	-0.154475	0.898459	NOT	0.0146168	0.169655	1.83514790338254
6739	Q80X82	Sympk	18.2307	17.9588	0.271885	1.20738	UP	0.0146411	0.169655	1.83442546253282
7260	Q9D071	Mms19	19.2491	18.9008	0.34834	1.27309	UP	0.0146514	0.169655	1.83412223827532
450	P51954	Nek1	16.2932	17.0357	-0.742425	0.597734	DOWN	0.0146534	0.169655	1.83406085416637
6368	P97379	G3bp2	19.3238	19.0971	0.226658	1.17012	NOT	0.0146562	0.169655	1.83397743192525
9	P20801	Tnnc2	11.7966	19.0688	-7.27224	0.00646901	DOWN	0.0146573	0.169655	1.83394602308476
7580	Q8BXL7	Arfrp1	16.6124	16.1936	0.418807	1.33682	UP	0.0146616	0.169655	1.83381984762811
7268	Q14AX6	Cdk12	14.2093	13.8592	0.350105	1.27465	UP	0.0146639	0.169655	1.83375089470879
8746	Q9D2Q2	Trmt44	15.831	11.7729	4.05814	16.658	UP	0.0146968	0.169655	1.83278
7662	Q8VCH0	Acaa1b	19.8599	19.4202	0.439765	1.35638	UP	0.0146977	0.169655	1.8327496167589
6745	O35737	Hnrnph1	22.7124	22.4398	0.272568	1.20796	UP	0.0147117	0.169655	1.83233811395617
420	Q9D8C3	Alg13	15.9866	16.7552	-0.768543	0.58701	DOWN	0.0147227	0.169655	1.83201345175809
451	Q8CCK0	Macroh2a2	19.3081	20.0503	-0.74216	0.597844	DOWN	0.0147775	0.170066	1.83039832664603
461	O88393	Tgfbr3	16.6782	17.4082	-0.729967	0.602917	DOWN	0.0148043	0.170154	1.82961153606462
2751	Q9D8B4	Ndufa11	19.1997	19.3289	-0.129227	0.914321	NOT	0.0148759	0.170494	1.82751578633591
7898	O55029	Copb2	21.1817	20.6738	0.507923	1.422	UP	0.0148985	0.170494	1.82685704660677
151	Q9JJW5	Myoz2	16.8126	18.2883	-1.47571	0.359556	DOWN	0.0149021	0.170494	1.82675383805611
1412	D3YUE4	Fam151b	16.6488	16.9946	-0.34573	0.78691	DOWN	0.0149107	0.170494	1.82650080256031
6413	O08585	Clta	20.528	20.2967	0.231313	1.1739	NOT	0.0149574	0.170781	1.82514415333773
7431	Q8CDN6	Txnl1	19.9226	19.5375	0.385115	1.30596	UP	0.0149933	0.170781	1.82410271121729
6077	P23198	Cbx3	20.0601	19.8669	0.193233	1.14332	NOT	0.0149936	0.170781	1.82409367395061
2071	Q8VCA8	Scrn2	18.8417	19.0637	-0.222048	0.857348	NOT	0.0150598	0.171005	1.82218013242317
8535	Q8R527	Rhoq	15.0398	13.7632	1.27662	2.42271	UP	0.015061	0.171005	1.82214474969508
1115	Q8R5G7	Arap3	18.6512	19.0693	-0.418085	0.748417	DOWN	0.0150839	0.171005	1.82148552048418
6953	Q01339	Apoh	21.1369	20.8365	0.300385	1.23147	UP	0.0150965	0.171005	1.82112367112313
353	Q8BWY2	Clec1a	17.2374	18.0817	-0.84427	0.556993	DOWN	0.0151097	0.171005	1.82074539434384
680	Q9CZJ2	Hspa12b	21.4191	22.0014	-0.58231	0.667894	DOWN	0.0151537	0.171285	1.81948154406691
704	P37804	Tagln	21.9451	22.5193	-0.57412	0.671696	DOWN	0.0151755	0.171313	1.81885750607703
5508	Q8CI75	Dis3l2	17.8375	17.6987	0.138738	1.10094	NOT	0.0152103	0.171487	1.81786344783136
1307	Q02858	Tek	17.7266	18.0955	-0.3689	0.774373	DOWN	0.0152438	0.171562	1.81690635898584
8035	Q8K297	Colgalt1	19.7458	19.1834	0.56248	1.47681	UP	0.01528	0.171562	1.81587707209674
148	Q7TQ48	Srl	18.1907	19.6772	-1.48643	0.356896	DOWN	0.0152804	0.171562	1.81586476535389
6539	A2AIG8	Accs	16.7567	16.5107	0.246007	1.18592	NOT	0.0152942	0.171562	1.81547300773686
593	Q9WV92	Epb41l3	18.4484	19.0785	-0.630162	0.646104	DOWN	0.0153426	0.171882	1.81410117892244
7768	Q6PB93	Galnt2	19.5474	19.0817	0.465653	1.38094	UP	0.0153774	0.171882	1.81311737095769
13	P18419	Svs4	12.0574	18.8339	-6.77645	0.00912188	DOWN	0.0153809	0.171882	1.81301844907856
250	Q91XA9	Chia	18.4292	19.4545	-1.02534	0.491294	DOWN	0.015466	0.172496	1.81062199415797
800	Q6EDY6	Carmil1	18.8258	19.3528	-0.527057	0.693969	DOWN	0.0154849	0.172496	1.81009024870894
1224	Q8C460	Eri3	18.2942	18.6849	-0.390697	0.762761	DOWN	0.0154941	0.172496	1.80983302874117
118	P50462	Csrp3	17.5781	19.3092	-1.73103	0.301236	DOWN	0.0155292	0.17267	1.80885016165648
2109	O88968	Tcn2	18.2892	18.5041	-0.214935	0.861585	NOT	0.0155498	0.172682	1.80827569518124
1044	Q9D1I5	Mcee	16.7883	17.2291	-0.44076	0.736746	DOWN	0.0156068	0.173099	1.80668677506932
1710	P61922	Abat	17.0381	17.3188	-0.280635	0.823229	DOWN	0.0156293	0.173132	1.80606180637274
6775	Q8R3G1	Ppp1r8	18.017	17.7404	0.276533	1.21128	UP	0.015715	0.173405	1.80368544883244
376	P12791	Cyp2b10	21.8178	22.6404	-0.822608	0.565419	DOWN	0.0157174	0.173405	1.8036182164885
1920	Q9WV76	Ap4b1	15.1623	15.4088	-0.24654	0.842916	NOT	0.0157187	0.173405	1.80358298791172
7974	Q99LJ6	Gpx7	18.6174	18.0818	0.53557	1.44951	UP	0.0157407	0.173405	1.80297573744214
8122	P70248	Myo1f	19.5557	18.949	0.606738	1.52281	UP	0.0157525	0.173405	1.80264996031565
154	Q5EBG6	Hspb6	16.371	17.7943	-1.42324	0.372875	DOWN	0.0157906	0.173405	1.80160101012154
462	Q8R5M0	Gipc3	16.4437	17.1724	-0.72867	0.60346	DOWN	0.0157907	0.173405	1.8015983973128
528	Q62559	Ift52	17.039	17.714	-0.675068	0.626303	DOWN	0.0158511	0.173853	1.79994037499402
8134	Q9WTZ0	Uxt	16.9943	16.3753	0.619027	1.53584	UP	0.0158919	0.174085	1.79882291932407
677	P47738	Aldh2	24.3217	24.9058	-0.584087	0.667071	DOWN	0.0159576	0.174298	1.79703111899371
891	Q9JK84	Pard6g	18.8163	19.311	-0.49472	0.709699	DOWN	0.0159657	0.174298	1.79681184509195
7886	Q99LR1	Abhd12	19.0473	18.5429	0.504417	1.41855	UP	0.0159702	0.174298	1.79668828531608
6091	Q8CEC0	Nup88	17.6003	17.4049	0.195362	1.14501	NOT	0.0160322	0.174759	1.79500723015701
7603	P26350	Ptma	22.5209	22.098	0.422882	1.3406	UP	0.0160706	0.174777	1.79396850296931
7095	P23249	Mov10	17.3582	17.0365	0.321715	1.24982	UP	0.0160733	0.174777	1.7938953816455
6608	P48441	Idua	16.1537	15.9003	0.25341	1.19202	NOT	0.0161044	0.174901	1.79305609822752
7308	Q0VGB7	Ppp4r2	17.2342	16.877	0.357208	1.28094	UP	0.0162126	0.175552	1.79014663567936
509	P70175	Dlg3	16.4416	17.1281	-0.68643	0.62139	DOWN	0.0162236	0.175552	1.78985271639779
5454	P51150	Rab7a	22.5375	22.404	0.133563	1.097	NOT	0.0162432	0.175552	1.78932741898945
475	P15508	Sptb	20.4989	21.2134	-0.714488	0.609422	DOWN	0.0162434	0.175552	1.78932185774117
8067	Q64516	Gk	18.8773	18.3004	0.576993	1.49174	UP	0.0162985	0.175835	1.78785185690581
848	O35516	Notch2	16.6252	17.1355	-0.51029	0.702081	DOWN	0.0163093	0.175835	1.78756545083912
696	P63011	Rab3a	17.6769	18.2534	-0.576545	0.670568	DOWN	0.0163464	0.1759	1.78657681527894
8797	Q8CEE6	Pask	16.4727	11.9217	4.551	23.4417	UP	0.016355	0.1759	1.78634969052716
6100	Q8C1E7	Tmem120a	16.6732	16.4769	0.196258	1.14572	NOT	0.0164264	0.176455	1.78445670693698
5973	Q922V4	Plrg1	18.4315	18.2493	0.18212	1.13455	NOT	0.0164948	0.17654	1.78265357782246
8376	P15379	Cd44	20.9055	20.0323	0.873225	1.83175	UP	0.0165287	0.17654	1.78176012043135
558	P97468	Cmklr1	18.0752	18.7282	-0.653027	0.635944	DOWN	0.0165323	0.17654	1.78166546155093
8270	Q9D819	Ppa1	20.9296	20.1947	0.734832	1.6642	UP	0.0165338	0.17654	1.78162802930194
7254	Q91YE6	Ipo9	18.7525	18.4051	0.347425	1.27229	UP	0.0166182	0.17654	1.77941536526145
8048	P13439	Umps	18.2304	17.6613	0.569085	1.48358	UP	0.0166225	0.17654	1.7793039196457
794	P10922	H1-0	23.0493	23.5798	-0.530523	0.692304	DOWN	0.0166258	0.17654	1.77921721305117
431	Q9JMG7	Hdgfl3	18.4242	19.1853	-0.76108	0.590054	DOWN	0.0166322	0.17654	1.77905071909851
7634	Q8BRF7	Scfd1	19.8775	19.4466	0.430893	1.34807	UP	0.0166405	0.17654	1.77883417659922
1279	Q9JI75	Nqo2	19.5236	19.8996	-0.37599	0.770576	DOWN	0.0166529	0.17654	1.77850989114885
516	O08638	Myh11	23.7952	24.4765	-0.681288	0.623609	DOWN	0.0167062	0.17654	1.77712216772175
1312	Q9JJZ2	Tuba8	18.7132	19.0805	-0.367355	0.775202	DOWN	0.0167089	0.17654	1.77705125643128
784	Q3U284	Tmem231	16.4302	16.9638	-0.533672	0.690794	DOWN	0.0167216	0.17654	1.77672092294746
7971	Q921M7	Cyrib	20.5257	19.9905	0.535155	1.4491	UP	0.0167218	0.17654	1.77671572858044
8492	Q9CRA4	Msmo1	16.3554	15.2469	1.1085	2.15621	UP	0.0167328	0.17654	1.77643221040102
8356	Q9QZL0	Ripk3	18.2335	17.403	0.830527	1.77834	UP	0.0167683	0.176705	1.77551034311403
491	Q91XD2	Lims2	19.4895	20.1904	-0.70085	0.61521	DOWN	0.0167949	0.176775	1.7748219312185
8604	O70570	Pigr	18.2227	16.3225	1.90022	3.73271	UP	0.016898	0.177497	1.77216546525329
33	Q8VHR0	Pcdh18	11.5196	16.6786	-5.159	0.0279889	DOWN	0.0169227	0.177497	1.77152957461277
7854	P62754	Rps6	23.2514	22.7601	0.491312	1.40572	UP	0.0169495	0.177497	1.77084190442428
6302	P80317	Cct6a	21.4	21.1798	0.220105	1.16482	NOT	0.0169999	0.177497	1.76955383767779
8123	Q5SSZ7	Znrf3	18.2637	17.6562	0.60747	1.52359	UP	0.0170255	0.177497	1.76889979338213
1322	O70250	Pgam2	21.0302	21.3967	-0.366455	0.775686	DOWN	0.0170331	0.177497	1.76870691579576
7773	Q9DBG6	Rpn2	22.0517	21.5841	0.46765	1.38286	UP	0.0170507	0.177497	1.76825720093816
8697	Q61124	Cln3	15.4759	11.9089	3.56707	11.8521	UP	0.0170597	0.177497	1.76802853392957
230	Q9CZQ9	Bbs5	14.5597	15.6369	-1.07713	0.47397	DOWN	0.0170663	0.177497	1.76786103154959
807	Q9Z1P7	Kank3	19.3946	19.9172	-0.52261	0.696111	DOWN	0.0170952	0.177497	1.76712634743801
7101	P14069	S100a6	23.389	23.0662	0.3228	1.25076	UP	0.0170989	0.177497	1.76703231015912
8497	Q9D2Z4	Senp8	16.3022	15.1811	1.12109	2.17511	UP	0.0171123	0.177497	1.7666923252598
8465	Q99J64	Rbm43	14.2086	13.1629	1.04574	2.06443	UP	0.017132	0.177497	1.76619127517858
7618	Q9QXT0	Cnpy2	19.4581	19.0303	0.427765	1.34515	UP	0.0171436	0.177497	1.76589779761763
8366	P11276	Fn1	21.3023	20.4461	0.856252	1.81033	UP	0.0171796	0.177663	1.76498712920954
495	O08530	S1pr1	18.1772	18.8749	-0.697695	0.616556	DOWN	0.0172146	0.177667	1.76410308937613
7223	Q8CCS6	Pabpn1	19.6412	19.2993	0.34186	1.26739	UP	0.0172325	0.177667	1.76365216647107
6592	Q80YR4	Znf598	17.4422	17.1913	0.250933	1.18998	NOT	0.0172956	0.177667	1.76206409110892
1866	Q8BTW9	Pak4	18.4063	18.6624	-0.256175	0.837305	NOT	0.0173584	0.177667	1.76049135895597
1862	Q9R117	Tyk2	17.3852	17.6417	-0.256437	0.837153	NOT	0.0175013	0.177667	1.75692926878162
7691	Q8WTY4	Ciapin1	17.7843	17.3382	0.446103	1.36235	UP	0.0175115	0.177667	1.75667635392186
537	Q0II04	Nebl	17.2193	17.8878	-0.668547	0.62914	DOWN	0.0175404	0.177667	1.75596100218346
7728	O89079	Cope	19.9106	19.4543	0.45631	1.37203	UP	0.0175591	0.177667	1.75549878662898
903	Q99MR8	Mccc1	19.5877	20.0772	-0.489575	0.712235	DOWN	0.0175609	0.177667	1.75545224094206
6774	Q9DC50	Crot	18.1413	17.8652	0.276118	1.21093	UP	0.0175689	0.177667	1.7552550088758
6236	Q80W54	Zmpste24	18.2606	18.0482	0.212377	1.1586	NOT	0.0175721	0.177667	1.75517598788963
1106	Q9DCK3	Tspan4	16.5854	17.006	-0.420608	0.74711	DOWN	0.0175724	0.177667	1.75516966090031
8290	Q922R8	Pdia6	23.3919	22.6407	0.75122	1.68322	UP	0.0175766	0.177667	1.75506493296067
988	O55222	Ilk	21.3183	21.7762	-0.457867	0.728062	DOWN	0.0175815	0.177667	1.75494298812257
423	Q61146	Ocln	18.5601	19.3268	-0.766705	0.587758	DOWN	0.0176398	0.177667	1.75350730339265
1258	Q4PZA2	Ece1	18.9041	19.2854	-0.381295	0.767748	DOWN	0.017653	0.177667	1.75318128197609
8038	Q9Z2L6	Minpp1	17.6501	17.0864	0.56377	1.47813	UP	0.0176553	0.177667	1.75312499687239
7868	Q9CPR4	Rpl17	21.1618	20.6664	0.495383	1.40969	UP	0.0176558	0.177667	1.75311274697288
140	Q62234	Myom1	15.7171	17.2518	-1.53475	0.345139	DOWN	0.017705	0.177667	1.75190460855481
1291	Q80VQ0	Aldh3b1	19.7667	20.1397	-0.372937	0.772209	DOWN	0.0177071	0.177667	1.75185214309645
5325	O55201	Supt5h	18.6861	18.563	0.123065	1.08905	NOT	0.0177084	0.177667	1.75182175576471
933	Q3ULF4	Spg7	17.0155	17.4943	-0.478795	0.717577	DOWN	0.0177212	0.177667	1.75150579467401
137	Q9D1G3	Hhatl	14.9686	16.5553	-1.58669	0.332935	DOWN	0.0177321	0.177667	1.75124002410242
120	P50752	Tnnt2	18.6002	20.2779	-1.67771	0.312578	DOWN	0.0177421	0.177667	1.75099612774083
1001	Q64105	Spr	21.0019	21.4559	-0.454002	0.730015	DOWN	0.0177447	0.177667	1.75093219524706
7111	Q60710	Samhd1	22.939	22.615	0.324072	1.25186	UP	0.0177459	0.177667	1.75090150511919
8668	Q62447	Ccnc	15.0206	11.8245	3.19615	9.16508	UP	0.0177524	0.177667	1.75074309631896
873	P10833	Rras	21.0214	21.5232	-0.501807	0.706221	DOWN	0.0177551	0.177667	1.75067670610697
7858	Q99JX3	Gorasp2	20.1473	19.6548	0.492555	1.40693	UP	0.0178228	0.177667	1.7490229941849
336	Q8VD72	Ttc8	15.2889	16.1673	-0.87838	0.543978	DOWN	0.017824	0.177667	1.74899553311264
41	D0G895	Ace3	11.39	16.247	-4.85696	0.0345072	DOWN	0.0178383	0.177667	1.74864751034401
8511	O88312	Agr2	19.1626	17.988	1.17463	2.25734	UP	0.0178571	0.177667	1.74818807217283
923	P25911	Lyn	20.1798	20.6607	-0.480897	0.716532	DOWN	0.0178825	0.177667	1.74757254343638
443	Q8R3P0	Aspa	16.0731	16.8233	-0.750282	0.594487	DOWN	0.0178897	0.177667	1.74739589836407
7988	Q8VCW4	Unc93b1	18.7161	18.1742	0.54186	1.45585	UP	0.0179061	0.177667	1.74699918846873
764	Q3UTJ2	Sorbs2	17.2273	17.7714	-0.54405	0.685843	DOWN	0.0179207	0.177667	1.74664583010757
6375	P62334	Psmc6	21.2529	21.0254	0.227465	1.17078	NOT	0.017927	0.177667	1.74649289025773
7434	P60229	Eif3e	20.4285	20.0429	0.385647	1.30645	UP	0.0179526	0.177667	1.74587325025638
1951	Q9EPN1	Nbea	16.8274	17.0694	-0.242017	0.845562	NOT	0.0179948	0.177667	1.74485314481406
7056	Q9WUA3	Pfkp	19.7518	19.4368	0.31495	1.24397	UP	0.01801	0.177667	1.74448534673258
1649	Q8C4V1	Arhgap24	17.4377	17.7305	-0.292755	0.816342	DOWN	0.0180123	0.177667	1.74443097301625
8333	Q3TBT3	Sting1	19.7667	18.976	0.790758	1.72998	UP	0.018041	0.177667	1.74373951385101
8647	Q9ESG6	P2ry14	14.4205	11.5573	2.86318	7.27616	UP	0.0180482	0.177667	1.74356665851311
363	P58774	Tpm2	21.8471	22.679	-0.831885	0.561795	DOWN	0.0181066	0.177667	1.74216378805041
7765	P97864	Casp7	18.7085	18.2438	0.46465	1.37998	UP	0.0181332	0.177667	1.74152518912156
7741	Q04841	Mpg	16.3055	15.8465	0.458965	1.37456	UP	0.0181478	0.177667	1.74117675743466
7800	Q00547	Hmmr	18.2665	17.7927	0.47378	1.38874	UP	0.0181602	0.177667	1.74087951635021
6254	P97363	Sptlc2	18.9154	18.7019	0.213597	1.15958	NOT	0.0181662	0.177667	1.7407347612532
8468	Q9EPB4	Pycard	20.0005	18.9528	1.04775	2.0673	UP	0.0181785	0.177667	1.74044279164072
198	Q6PE87	Cfap206	18.1938	19.3754	-1.18165	0.440846	DOWN	0.0181812	0.177667	1.74037716911365
7138	Q9WV32	Arpc1b	21.7155	21.3887	0.326817	1.25424	UP	0.0182581	0.178222	1.73854437103881
2698	B1AY13	Usp24	17.7072	17.844	-0.1368	0.909534	NOT	0.0182816	0.178255	1.73798643902728
1401	P05627	Jun	15.8231	16.1717	-0.348695	0.785294	DOWN	0.0183168	0.178403	1.73715075224508
1378	P42125	Eci1	20.6014	20.9551	-0.353655	0.782599	DOWN	0.0183672	0.178697	1.73595737599062
77	Q91ZP6	Ndfip2	13.7348	17.1528	-3.41796	0.0935603	DOWN	0.0184411	0.178895	1.73421357747368
5832	Q6R891	Ppp1r9b	18.1837	18.015	0.168708	1.12405	NOT	0.0184479	0.178895	1.73405
6594	Q9JII6	Akr1a1	22.1773	21.9262	0.251072	1.19009	NOT	0.0184495	0.178895	1.73401641136801
1963	Q6PHN9	Rab35	18.757	18.9969	-0.239865	0.846825	NOT	0.0184682	0.178895	1.73357630102104
7892	Q3TCN2	Plbd2	19.642	19.1356	0.506443	1.42054	UP	0.0185338	0.179247	1.73203585585875
1091	Q9CPT3	Nanp	16.3921	16.8167	-0.424535	0.745079	DOWN	0.0186224	0.179247	1.72996490886177
6551	Q8VCT3	Rnpep	21.4315	21.1844	0.24706	1.18679	NOT	0.0186465	0.179247	1.72940265119893
547	Q9D6F9	Tubb4a	18.2925	18.9522	-0.659685	0.633016	DOWN	0.0186514	0.179247	1.72928751606891
5761	P08226	Apoe	21.2258	21.0634	0.162408	1.11915	NOT	0.0186651	0.179247	1.72897016758116
6225	O08663	Metap2	19.21	18.9983	0.211748	1.15809	NOT	0.0186669	0.179247	1.72892684518253
8437	P52624	Upp1	20.1304	19.1594	0.970958	1.96014	UP	0.0186822	0.179247	1.72857114607451
7181	O70252	Hmox2	19.1832	18.8495	0.333678	1.26022	UP	0.0186914	0.179247	1.72835733195883
7338	Q5U4D9	Thoc6	17.9086	17.545	0.363592	1.28663	UP	0.0187148	0.179247	1.72781392788755
852	Q61234	Snta1	18.711	19.2194	-0.508437	0.702983	DOWN	0.0187154	0.179247	1.72780053829513
997	Q69ZH9	Arhgap23	15.7821	16.2372	-0.455145	0.729437	DOWN	0.0187409	0.179247	1.72720981159995
7587	P17182	Eno1	23.7469	23.3274	0.419495	1.33746	UP	0.0187469	0.179247	1.72707104688376
172	P11404	Fabp3	18.2392	19.5335	-1.29431	0.40773	DOWN	0.0188143	0.179698	1.72551184295933
8278	Q9D270	Zdhhc21	15.838	15.0975	0.740565	1.67083	UP	0.0188493	0.179737	1.72470500380776
1457	P26039	Tln1	23.1397	23.4758	-0.336095	0.792183	DOWN	0.0188646	0.179737	1.7243534810505
8551	Q9D306	Mgat4c	17.9816	16.6271	1.35449	2.55707	UP	0.0188791	0.179737	1.72401781597415
8277	P46978	Stt3a	21.3129	20.5724	0.740457	1.67071	UP	0.0189048	0.179788	1.72342899253777
8389	O55100	Syngr1	18.966	18.0807	0.885247	1.84708	UP	0.0189816	0.180197	1.72166603876072
6484	B2RY04	Dock5	16.8091	16.5703	0.238762	1.17998	NOT	0.0189884	0.180197	1.72151203991853
867	Q9DCM2	Gstk1	20.2734	20.7779	-0.504463	0.704923	DOWN	0.0190867	0.180768	1.71926981243423
1167	Q91ZA3	Pcca	20.3365	20.7397	-0.40315	0.756205	DOWN	0.0191055	0.180768	1.7188421604192
649	Q99P51	Rassf3	13.0188	13.6179	-0.59906	0.660184	DOWN	0.0191479	0.180768	1.71787785132413
8019	Q64152	Btf3	18.57	18.0177	0.55229	1.46641	UP	0.0191532	0.180768	1.71775967672244
1151	P13595	Ncam1	18.5672	18.9753	-0.408185	0.753571	DOWN	0.0191655	0.180768	1.71748075256073
6013	O88291	Znf326	18.043	17.8563	0.18663	1.1381	NOT	0.0191954	0.180768	1.71680317285636
8041	Q8K0C4	Cyp51a1	16.9165	16.352	0.56454	1.47892	UP	0.0192183	0.180768	1.71628577724345
8561	Q8K4D3	Slc36a1	16.6128	15.2002	1.41262	2.6622	UP	0.0192271	0.180768	1.71608596646434
6096	Q62433	Ndrg1	17.7852	17.5893	0.19594	1.14547	NOT	0.0192982	0.180768	1.71448290447256
1352	Q91VL8	Terf2ip	15.7849	16.1437	-0.358745	0.779843	DOWN	0.019314	0.180768	1.71412739066902
6864	P61028	Rab8b	19.8626	19.5749	0.28774	1.22073	UP	0.0193181	0.180768	1.71403594984034
668	P16125	Ldhb	21.8267	22.4144	-0.587723	0.665392	DOWN	0.0193253	0.180768	1.71387339593827
5909	Q9CQE8	RTRAF	20.0117	19.8359	0.17575	1.12955	NOT	0.0193721	0.180768	1.71282370129842
567	O89114	Dnajb5	15.6109	16.2593	-0.648405	0.637985	DOWN	0.0194288	0.180768	1.71155404468038
706	Q9R1W5	Calcrl	20.9215	21.4941	-0.572612	0.672398	DOWN	0.01943	0.180768	1.71152795936035
5921	P97770	Thumpd3	17.4624	17.2848	0.177517	1.13094	NOT	0.0194337	0.180768	1.71144385772562
6407	Q8C5N3	Cwc22	16.9762	16.7455	0.230763	1.17345	NOT	0.0194351	0.180768	1.7114138461238
7471	Q640L3	Ccpg1	17.3194	16.9231	0.39634	1.31616	UP	0.0194508	0.180768	1.71106355877568
7528	Q8BML9	Qars1	20.4164	20.008	0.408457	1.32727	UP	0.0194616	0.180768	1.71082130166184
6914	O35326	Srsf5	19.6817	19.386	0.295642	1.22743	UP	0.0194779	0.180768	1.71045851478193
8345	P33611	Pola2	17.52	16.7114	0.808535	1.75143	UP	0.0195064	0.180768	1.70982294113967
302	Q62151	Ager	25.4025	26.3335	-0.93102	0.524487	DOWN	0.0195188	0.180768	1.70954717517216
774	Q8R3G9	Tspan8	22.2611	22.7993	-0.538215	0.688622	DOWN	0.019527	0.180768	1.70936529664577
8683	Q3V1H1	Ckap2	14.4722	11.107	3.36521	10.3045	UP	0.0195498	0.180768	1.7088577256307
6698	Q921M4	Golga2	18.4422	18.1751	0.267095	1.20338	UP	0.0195579	0.180768	1.70867757890958
2200	Q3ULJ0	Gpd1l	20.0507	20.2532	-0.20253	0.869025	NOT	0.0195894	0.180871	1.70797789025124
7174	Q9CQM9	Glrx3	19.8128	19.4801	0.33271	1.25938	UP	0.0196422	0.181065	1.7068094732307
8247	P05063	Aldoc	17.623	16.9168	0.706172	1.63147	UP	0.0196779	0.181065	1.70602167010969
7485	Q91UZ5	Impa2	17.3035	16.9031	0.40042	1.31989	UP	0.0196894	0.181065	1.70576793711277
337	Q8R0Y8	Slc25a42	15.4708	16.3457	-0.874855	0.545309	DOWN	0.019692	0.181065	1.70570915839985
813	Q3V3R4	Itga1	21.2808	21.8021	-0.521265	0.696761	DOWN	0.0197178	0.181114	1.70514099216323
153	E9Q9R9	Dlg5	18.4136	19.8448	-1.43122	0.370818	DOWN	0.0197477	0.1812	1.70448369897054
6246	Q01853	Vcp	23.6799	23.467	0.212858	1.15898	NOT	0.0197681	0.1812	1.7040358615557
7530	Q2TBE6	Pi4k2a	18.4693	18.0599	0.40942	1.32815	UP	0.019822	0.181312	1.70285228719187
449	P12790	Cyp2b9	18.4749	19.2177	-0.742883	0.597544	DOWN	0.0198314	0.181312	1.70264662564277
8446	Q8K5C0	Grhl2	16.4086	15.4041	1.00452	2.00628	UP	0.0198888	0.181312	1.70139100455837
7149	E9Q6E9	Simc1	18.2674	17.9397	0.327682	1.255	UP	0.0198962	0.181312	1.70122936006991
7916	P43404	Zap70	16.6109	16.0962	0.514645	1.42864	UP	0.0199189	0.181312	1.70073406001524
7040	P57746	Atp6v1d	19.3238	19.0109	0.312908	1.24221	UP	0.0199285	0.181312	1.70052429938821
8435	Q9QUN7	Tlr2	18.392	17.4329	0.959063	1.94405	UP	0.0199319	0.181312	1.70045031988697
5975	P70362	Ufd1	19.7366	19.5542	0.182358	1.13474	NOT	0.0199471	0.181312	1.7001202350923
7907	Q9QWR8	Naga	20.7192	20.2084	0.510787	1.42483	UP	0.0199642	0.181312	1.6997483708492
7706	Q8CHP6	Phc3	17.0474	16.5968	0.450653	1.36666	UP	0.0200081	0.181418	1.69879423750255
8190	P54227	Stmn1	21.3719	20.7132	0.65874	1.5787	UP	0.0200354	0.181418	1.69820267624593
7807	Q91YW3	Dnajc3	20.5889	20.1123	0.47654	1.3914	UP	0.0200372	0.181418	1.69816
1675	P21447	Abcb1a	18.1705	18.4591	-0.28859	0.818702	DOWN	0.0201196	0.181426	1.69638054985887
8320	P61620	Sec61a1	21.2025	20.4265	0.775955	1.71232	UP	0.020126	0.181426	1.69624227270093
216	Q3TMP8	Tmem38a	17.2608	18.3807	-1.11987	0.460135	DOWN	0.020139	0.181426	1.69596127863195
1917	A6X8Z5	Arhgap31	18.4694	18.7164	-0.246947	0.842677	NOT	0.0201414	0.181426	1.69590997898434
601	Q9WVC3	Cav2	20.1944	20.8204	-0.626032	0.647956	DOWN	0.0201576	0.181426	1.6955622327321
1284	P29758	Oat	22.0664	22.4414	-0.374997	0.771107	DOWN	0.0201607	0.181426	1.69549462977687
3134	A8Y5H7	Sec14l1	16.4694	16.5578	-0.0884025	0.940564	NOT	0.0202399	0.181954	1.69379195942153
1004	Q63836	Selenbp2	25.3519	25.8051	-0.453253	0.730394	DOWN	0.0203019	0.182326	1.69246395749184
7520	Q9DBZ5	Eif3k	20.0476	19.6398	0.407782	1.32665	UP	0.0203689	0.182494	1.69103150714013
8432	P30282	Ccnd3	16.6682	15.723	0.945213	1.92547	UP	0.0204165	0.182494	1.69001898349135
146	Q06318	Scgb1a1	25.4541	26.9524	-1.49832	0.353966	DOWN	0.0205343	0.182494	1.68752054149884
2905	Q8R1N4	Nudcd3	18.1959	18.309	-0.113047	0.924633	NOT	0.0205366	0.182494	1.6874704829701
1192	O70318	Epb41l2	20.9675	21.3649	-0.397317	0.759269	DOWN	0.0206496	0.182494	1.68508818832006
5693	Q9EPU0	Upf1	20.2096	20.055	0.15461	1.11312	NOT	0.020687	0.182494	1.68430200269803
110	Q8C5D8	Pias2	16.2396	18.108	-1.86839	0.273878	DOWN	0.0207401	0.182494	1.68318930053636
8233	Q8WUR0		18.8838	18.1897	0.69411	1.61789	UP	0.0208007	0.182494	1.68192250893821
1773	Q9DCZ4	Apoo	19.8886	20.1583	-0.26974	0.829469	DOWN	0.0208088	0.182494	1.68175
158	O70468	Mybpc3	16.3326	17.7246	-1.39196	0.381047	DOWN	0.0208204	0.182494	1.68151093111155
8455	P11835	Itgb2	21.2063	20.1789	1.02734	2.03826	UP	0.0208358	0.182494	1.68118988248379
6218	Q91VM5	Rbmxl1	21.841	21.63	0.211055	1.15753	NOT	0.0209089	0.182494	1.67966918833065
1180	Q69ZX8	Ablim3	18.6801	19.0795	-0.399357	0.758196	DOWN	0.020938	0.182494	1.67906584162903
893	O88502	Pde8a	16.1283	16.6228	-0.494503	0.709806	DOWN	0.0209614	0.182494	1.67857938293761
8049	P14206	Rpsa	23.0499	22.4801	0.56977	1.48429	UP	0.0210036	0.182494	1.6777056408503
5931	Q569Z6	Thrap3	19.6169	19.4383	0.178605	1.13179	NOT	0.0210095	0.182494	1.67758510999453
981	P16332	Mmut	19.3238	19.7834	-0.45959	0.727193	DOWN	0.0210327	0.182494	1.67710443582371
144	Q6P9L6	Kif15	16.118	17.6227	-1.50471	0.352401	DOWN	0.0210351	0.182494	1.6770548822236
917	Q8VDC0	Lars2	16.9256	17.4082	-0.482548	0.715713	DOWN	0.0210433	0.182494	1.67688559610031
1059	P51432	Plcb3	19.1688	19.6024	-0.433535	0.740445	DOWN	0.021091	0.182494	1.67590233411763
7279	Q64514	Tpp2	19.8549	19.5031	0.3518	1.27615	UP	0.0211179	0.182494	1.67535011415047
7289	O08912	Galnt1	18.1564	17.8026	0.353822	1.27794	UP	0.0211703	0.182494	1.67427354152574
6653	Q8BP48	Metap1	16.996	16.7359	0.26006	1.19753	NOT	0.0211772	0.182494	1.67413189249719
7581	Q99KK7	Dpp3	20.2403	19.8214	0.418825	1.33684	UP	0.0211868	0.182494	1.67393399761369
8275	A2AJ15	Man1b1	17.2205	16.4824	0.73802	1.66789	UP	0.0211912	0.182494	1.67384545388981
936	Q80WT5	Aftph	16.6479	17.1258	-0.47789	0.718027	DOWN	0.0212085	0.182494	1.67349018980669
8272	Q80VA0	Galnt7	16.6388	15.9023	0.736528	1.66616	UP	0.0212538	0.182494	1.67256441173878
7374	P32020	Scp2	21.4371	21.0655	0.37162	1.2938	UP	0.0212659	0.182494	1.67231521156072
928	Q9R1Z8	Sorbs3	20.8577	21.3377	-0.480088	0.716934	DOWN	0.0212666	0.182494	1.6723016923682
406	P63268	Actg2	21.2087	21.9914	-0.78278	0.581246	DOWN	0.0212793	0.182494	1.67204190747319
7125	Q60855	Ripk1	18.8781	18.5523	0.325795	1.25335	UP	0.0212806	0.182494	1.67201590691651
6908	Q8BHN3	Ganab	21.1821	20.8877	0.29434	1.22632	UP	0.0212888	0.182494	1.67184883843885
1358	Q8R3Q2	Ppp6r2	19.3611	19.7182	-0.35708	0.780743	DOWN	0.0212971	0.182494	1.67167912203894
1032	P48962	Slc25a4	22.5216	22.9657	-0.444072	0.735057	DOWN	0.0213202	0.182494	1.67120929597053
8338	P30412	Ppic	21.2333	20.4361	0.797172	1.73769	UP	0.0213276	0.182494	1.67105717818112
398	P47857	Pfkm	18.6837	19.4728	-0.789045	0.578727	DOWN	0.0213348	0.182494	1.67091166829038
6918	Q91WR3	Ascc2	16.6168	16.3209	0.29595	1.22769	UP	0.0213486	0.182494	1.67063062024239
8109	Q3V1T4	P3h1	17.6534	17.0568	0.596603	1.51215	UP	0.0213511	0.182494	1.67058011151846
1313	Q8CGE9	Rgs12	18.0269	18.394	-0.36708	0.77535	DOWN	0.0213671	0.182494	1.67025482395359
684	Q9Z1B8	Phf1	15.4309	16.0116	-0.580773	0.668606	DOWN	0.0213688	0.182494	1.67022055667844
1217	P51855	Gss	19.3081	19.7018	-0.39371	0.76117	DOWN	0.0213711	0.182494	1.67017320481082
5694	Q9Z1N5	Ddx39b	22.7412	22.5866	0.15465	1.11315	NOT	0.0213993	0.182494	1.66959974275482
1262	Q9JHI5	Ivd	20.8624	21.2427	-0.380315	0.76827	DOWN	0.0214017	0.182494	1.6695521947204
663	Q9D2N4	Dtna	19.1941	19.7834	-0.58937	0.664633	DOWN	0.0214359	0.182494	1.66885914882557
8176	Q2YDW2	Msto1	18.7431	18.0916	0.651423	1.57072	UP	0.0214697	0.182494	1.66817374080125
7533	P58021	Tm9sf2	19.975	19.5652	0.409805	1.32851	UP	0.0214756	0.182494	1.66805515883317
1219	Q8CI59	Steap3	18.6531	19.0462	-0.393112	0.761485	DOWN	0.021489	0.182494	1.66778310697942
2394	Q8K337	Inpp5b	18.7034	18.8789	-0.175512	0.885453	NOT	0.0215123	0.182494	1.66731371955417
8451	P25206	Mcm3	19.1598	18.1392	1.02057	2.02872	UP	0.0215375	0.182494	1.66680430625265
6155	Q78ZA7	Nap1l4	20.4872	20.2847	0.202517	1.1507	NOT	0.0215555	0.182494	1.66644165705347
109	P04247	Mb	18.6327	20.5845	-1.95179	0.258495	DOWN	0.0215841	0.182494	1.66586647810577
5929	Q6P2K6	Ppp4r3a	17.0224	16.8441	0.178368	1.1316	NOT	0.0215962	0.182494	1.66562247824157
89	P97457	Myl11	17.3548	20.3419	-2.98713	0.12612	DOWN	0.021623	0.182494	1.66508479482399
828	Q921U8	Smtn	18.0348	18.5534	-0.518578	0.69806	DOWN	0.0216416	0.182494	1.66471153729667
396	E9Q4S1	Pde8b	14.9299	15.723	-0.793033	0.57713	DOWN	0.0216537	0.182494	1.66446750335353
777	Q62417	Sorbs1	19.3565	19.8927	-0.536258	0.689557	DOWN	0.0216567	0.182494	1.6644075390187
7802	Q91YQ5	Rpn1	22.1593	21.6842	0.475118	1.39003	UP	0.021659	0.182494	1.66436121772616
8390	Q6ZQM8	Ugt1a7	18.7686	17.8801	0.888505	1.85126	UP	0.0216592	0.182494	1.66435692673958
2226	Q9D289	Trappc6b	18.3825	18.5804	-0.197895	0.871822	NOT	0.0216652	0.182494	1.66423725737614
7231	Q9QYA2	Tomm40	18.7596	18.4166	0.343017	1.26841	UP	0.0216814	0.182494	1.66391325908434
1037	Q8VHK1	Caskin2	17.9488	18.3908	-0.44199	0.736119	DOWN	0.0217216	0.182494	1.66310904776308
1608	P63094	Gnas	20.4785	20.7807	-0.30214	0.811048	DOWN	0.0217349	0.182494	1.66284173418797
7607	Q9EQH2	Erap1	19.6656	19.2415	0.424162	1.34179	UP	0.0217409	0.182494	1.66272198215176
6965	Q62422	Ostf1	21.7336	21.4307	0.302895	1.23362	UP	0.0217422	0.182494	1.66269609416064
8274	Q9JLC3	Msrb1	17.0428	16.3051	0.737688	1.6675	UP	0.0217604	0.182494	1.66233354481139
239	Q9JII1	Inpp5e	15.5451	16.5999	-1.05479	0.481366	DOWN	0.0217653	0.182494	1.66223532245397
8229	P14211	Calr	23.5753	22.8841	0.691213	1.61464	UP	0.0217996	0.182494	1.66155185369524
8094	Q9JM51	Ptges	16.7689	16.1779	0.59101	1.5063	UP	0.0218034	0.182494	1.6614753793021
6963	P62996	Tra2b	20.0678	19.7651	0.302702	1.23345	UP	0.021807	0.182494	1.6614044149846
803	Q9D1H6	Ndufaf4	17.5983	18.1226	-0.524347	0.695273	DOWN	0.02185	0.182494	1.66054849906503
8516	O70472	Tmem131	13.5503	12.3536	1.19666	2.29208	UP	0.0218509	0.182494	1.66053084938034
7409	P62830	Rpl23	21.855	21.4775	0.377422	1.29902	UP	0.0218525	0.182494	1.66049960642695
898	Q8BPB5	Efemp1	19.918	20.4113	-0.493258	0.710419	DOWN	0.0218753	0.182494	1.66004552568476
57	Q99MR9	Ppp1r3a	11.4513	15.8333	-4.38203	0.0479599	DOWN	0.0218934	0.182494	1.65968631207213
8459	P49718	Mcm5	19.5607	18.5288	1.03188	2.04468	UP	0.0219009	0.182494	1.65953778001846
829	O55143	Atp2a2	21.6113	22.1284	-0.517057	0.698796	DOWN	0.0219174	0.182494	1.65921112479505
8739	Q3UHD9	Agap2	16.0542	12.0731	3.98111	15.7919	UP	0.0219238	0.182494	1.65908325721036
238	Q9D2R4	Tmed11	18.6292	19.6849	-1.0557	0.481065	DOWN	0.0219247	0.182494	1.65906544907877
6714	Q8CI71	Vps50	17.4589	17.1899	0.269005	1.20498	UP	0.0219652	0.182608	1.65826570795984
271	Q6PB60	Gprasp3	16.0967	17.0825	-0.985868	0.504922	DOWN	0.0219811	0.182608	1.65795075579237
8162	P99029	Prdx5	22.8836	22.2471	0.636485	1.55454	UP	0.0220003	0.182608	1.65757216689655
7710	Q6ZWV3	Rpl10	21.9411	21.4886	0.452508	1.36842	UP	0.0220555	0.182896	1.65648271815381
6525	E9Q912	Rap1gds1	18.9719	18.7283	0.243638	1.18397	NOT	0.0220978	0.183075	1.65565092209517
595	Q9JLY7	Dusp14	16.6664	17.2955	-0.629053	0.646601	DOWN	0.022127	0.183146	1.65507783706607
1079	P58465	Ctdspl	17.9068	18.3331	-0.42633	0.744152	DOWN	0.0221826	0.183344	1.65398774777029
7820	P61924	Copz1	20.8233	20.3428	0.480502	1.39523	UP	0.0221922	0.183344	1.65379919221244
1537	P61793	Lpar1	17.1141	17.4293	-0.315217	0.80373	DOWN	0.0222407	0.183461	1.6528514112753
633	P58196	Plscr4	16.7904	17.3997	-0.60934	0.655497	DOWN	0.0222635	0.183461	1.65240712577706
7909	Q9D1M0	Sec13	20.0902	19.5791	0.511082	1.42512	UP	0.0222779	0.183461	1.65212483359044
290	Q8C8N2	Scai	15.1054	16.0534	-0.948	0.518351	DOWN	0.0223063	0.183461	1.65157267538527
669	Q9EPC1	Parva	21.8937	22.4812	-0.58744	0.665523	DOWN	0.0223098	0.183461	1.65150445927129
1521	O08911	Mapk12	17.84	18.1577	-0.317675	0.802362	DOWN	0.0223618	0.183719	1.65049232829991
2316	Q64735	Cr1l	20.2215	20.407	-0.185557	0.879309	NOT	0.0223847	0.183737	1.65004780979628
1321	Q9CZR3	Tomm40l	17.6723	18.0388	-0.366503	0.775661	DOWN	0.0224102	0.183776	1.64955380247976
7156	P28271	Aco1	20.1478	19.8189	0.328905	1.25606	UP	0.0224492	0.183926	1.64879847315726
646	P09470	Ace	21.9133	22.5138	-0.600485	0.659532	DOWN	0.0224835	0.184021	1.64813513485285
8339	P06800	Ptprc	21.0419	20.2425	0.799327	1.74029	UP	0.0225449	0.184021	1.64695247651236
1139	Q8CIZ8	Vwf	19.7481	20.1593	-0.411203	0.751996	DOWN	0.0225659	0.184021	1.6465481105756
66	A0AUP1	Ccdc112	11.2797	15.379	-4.09928	0.0583437	DOWN	0.022621	0.184021	1.64548843064055
2447	O08586	Pten	16.5552	16.7224	-0.167197	0.890571	NOT	0.0226261	0.184021	1.64538968354573
182	Q9JI91	Actn2	23.64	24.8956	-1.25562	0.418814	DOWN	0.0226286	0.184021	1.64534269825533
8337	Q8BH24	Tm9sf4	19.8944	19.0988	0.79557	1.73576	UP	0.0226376	0.184021	1.64516888919226
1109	Q3USB7	Plcl1	16.5722	16.9917	-0.419527	0.747669	DOWN	0.0226424	0.184021	1.64507721556966
7972	Q9ERR7	Selenof	19.3778	18.8425	0.53525	1.44919	UP	0.0226475	0.184021	1.64497965496501
8265	P52875	Tmem165	18.2806	17.5524	0.728228	1.6566	UP	0.0226943	0.184099	1.64408330410269
7927	Q9JM93	Arl6ip4	16.9373	16.4194	0.517898	1.43187	UP	0.0227113	0.184099	1.64375752789377
5659	P60670	Nploc4	19.4623	19.3102	0.152105	1.11119	NOT	0.0227254	0.184099	1.64348781406836
8326	O70131	Ninj1	15.9129	15.1304	0.782432	1.72003	UP	0.0227562	0.184099	1.64290033429292
1345	Q9Z0U1	Tjp2	21.2555	21.6159	-0.360418	0.778939	DOWN	0.0227608	0.184099	1.64281333599861
2360	A6H5Z3	Exoc6b	18.0341	18.2146	-0.18046	0.882422	NOT	0.0228531	0.184677	1.64105516504529
7908	Q8VDJ3	Hdlbp	20.6275	20.1165	0.51103	1.42507	UP	0.0228923	0.184768	1.64031004017193
6748	Q8BG05	Hnrnpa3	23.3487	23.0758	0.27293	1.20826	UP	0.0229331	0.184768	1.63953643982823
6352	Q91VH6	Memo1	17.9988	17.7739	0.224928	1.16872	NOT	0.0229332	0.184768	1.63953560658266
393	P15327	Bpgm	20.7768	21.5745	-0.797647	0.575286	DOWN	0.0229705	0.184768	1.63882898419461
6808	Q3TDN2	Faf2	20.0749	19.7945	0.280367	1.2145	UP	0.0229931	0.184768	1.63840303851556
348	Q9QYK7	Rnf11	15.6242	16.4789	-0.854735	0.552967	DOWN	0.0230205	0.184768	1.63788473845722
7896	P62242	Rps8	22.4993	21.9922	0.507195	1.42128	UP	0.0230447	0.184768	1.63742977043887
8735	Q3U962	Col5a2	15.8722	11.9121	3.96004	15.5629	UP	0.0230631	0.184768	1.63708226143349
142	Q6P8J7	Ckmt2	19.8081	21.3224	-1.51438	0.350047	DOWN	0.0230653	0.184768	1.63704113712158
125	Q6PD31	Trak1	13.4546	15.1182	-1.66362	0.315647	DOWN	0.0230951	0.184768	1.63648064187207
7759	Q64311	Ntan1	16.9092	16.4459	0.46326	1.37865	UP	0.0231223	0.184768	1.63596932523208
1206	Q8K371	Amotl2	15.3167	15.7119	-0.395255	0.760355	DOWN	0.0231529	0.184768	1.63539529802736
7582	Q9CZM2	Rpl15	21.8147	21.3959	0.418845	1.33686	UP	0.0232061	0.184768	1.63439840206149
8076	P82198	Tgfbi	19.6315	19.0494	0.58217	1.4971	UP	0.0232077	0.184768	1.63436763619553
1205	Q99JW4	Lims1	21.2373	21.6326	-0.39528	0.760342	DOWN	0.0232174	0.184768	1.63418549976046
8060	Q6ZWV7	Rpl35	20.7303	20.1571	0.57323	1.48785	UP	0.023248	0.184768	1.63361384261823
1744	Q9CYW4	Hdhd3	17.4054	17.6793	-0.273895	0.827084	DOWN	0.0232653	0.184768	1.63329139898123
273	O70423	Aoc3	19.1577	20.1393	-0.981612	0.506413	DOWN	0.0232723	0.184768	1.6331604880191
6404	P70388	Rad50	17.1175	16.8868	0.230692	1.1734	NOT	0.0232726	0.184768	1.63315513222321
8556	Q8BG07	Pld4	20.0837	18.7127	1.37098	2.58647	UP	0.0232808	0.184768	1.63300165235892
7962	Q6ZWY3	Rps27l	21.0725	20.5417	0.530763	1.44469	UP	0.0233104	0.184828	1.63244995731687
7210	Q62418	Dbnl	20.6848	20.3451	0.339697	1.26549	UP	0.0233464	0.184828	1.63177959421048
6819	Q64343	Abcg1	17.7859	17.504	0.281882	1.21578	UP	0.0233522	0.184828	1.63167223568265
8659	P60487	Pdxp	15.1784	12.1385	3.03991	8.22438	UP	0.0233716	0.184828	1.63131070037867
1635	Q5FWH6	Arhgef15	17.4238	17.718	-0.294148	0.815554	DOWN	0.0233959	0.184855	1.63085970526713
738	Q8C0S4	Ttc21a	15.3261	15.884	-0.557937	0.679273	DOWN	0.0235349	0.185755	1.62828753195534
128	P09541	Myl4	20.5931	22.2444	-1.65133	0.318347	DOWN	0.0235517	0.185755	1.62797847692436
1762	P42669	Pura	19.5427	19.8143	-0.271585	0.828409	DOWN	0.0235901	0.185858	1.6272701812873
7585	Q8BP67	Rpl24	21.9637	21.5444	0.419295	1.33727	UP	0.0236343	0.185858	1.62645760522831
463	P04919	Slc4a1	22.3848	23.113	-0.72812	0.60369	DOWN	0.023665	0.185858	1.62589376647253
280	Q8R1P4	Atg10	15.0879	16.0521	-0.964167	0.512574	DOWN	0.0236786	0.185858	1.62564381383121
145	O88346	Tnnt1	17.181	18.6799	-1.49891	0.353819	DOWN	0.0236846	0.185858	1.62553368879273
775	Q61288	Acvrl1	19.1018	19.64	-0.538185	0.688637	DOWN	0.0236907	0.185858	1.62542146517455
345	Q9CRB6	Tppp3	22.3436	23.2026	-0.859028	0.551324	DOWN	0.0237114	0.185858	1.62504360897086
341	P58771	Tpm1	22.5378	23.4062	-0.86837	0.547765	DOWN	0.0237441	0.18595	1.62444417759074
8583	P01639	Igkv9-120	18.9778	17.375	1.60283	3.03739	UP	0.0238489	0.186219	1.62253219374717
6259	Q3TXS7	Psmd1	20.3707	20.1561	0.21466	1.16043	NOT	0.0238724	0.186219	1.62210398998539
217	Q6VNS1	Ntrk3	18.7421	19.8589	-1.11685	0.461099	DOWN	0.023889	0.186219	1.62180292035953
1123	Q3TMH2	Scrn3	17.1912	17.6069	-0.415747	0.749631	DOWN	0.0238947	0.186219	1.62169909020167
2196	Q91ZM2	Sh2b1	16.9306	17.1334	-0.2028	0.868863	NOT	0.0239112	0.186219	1.62139821022601
8664	Q9QXW9	Slc7a8	14.9798	11.8511	3.12864	8.74607	UP	0.0239206	0.186219	1.6212286210619
1835	Q99KB8	Hagh	17.6688	17.9296	-0.260788	0.834632	NOT	0.0239428	0.186219	1.62082504408475
7976	Q91YH6	Atp6v1b1	21.1813	20.6448	0.536545	1.45049	UP	0.0239639	0.186219	1.62044215702995
7085	Q8BU11	Tox4	17.3648	17.0452	0.31961	1.24799	UP	0.0239674	0.186219	1.62037954710046
8029	Q8BVZ5	Il33	16.7233	16.1644	0.558935	1.47318	UP	0.0240108	0.186394	1.61959277284476
7395	Q8VC30	Tkfc	17.1858	16.8102	0.375572	1.29735	UP	0.0240593	0.186607	1.61871639878039
7496	Q9JJA2	Cog8	16.6961	16.2943	0.40178	1.32114	UP	0.0241722	0.186952	1.61668326410313
8085	Q8R502	Lrrc8c	19.2671	18.6805	0.586595	1.5017	UP	0.0241752	0.186952	1.61663022973351
6728	P26952	Il3ra	17.193	16.9225	0.270487	1.20622	UP	0.0241849	0.186952	1.61645620680109
6152	Q8BYA0	Tbcd	18.4061	18.2043	0.201865	1.15018	NOT	0.0241881	0.186952	1.61639802911565
7982	Q9D8S3	Arfgap3	18.2742	17.7346	0.539643	1.45361	UP	0.0242574	0.187324	1.61515650225362
6303	Q91YS8	Camk1	17.5493	17.3291	0.220202	1.1649	NOT	0.0242798	0.187335	1.61475426894905
5213	Q6PFD9	Nup98	18.911	18.7995	0.111545	1.08038	NOT	0.0243401	0.187637	1.61367782025422
309	Q9WVB2	Tle2	17.5082	18.429	-0.920787	0.528221	DOWN	0.0244274	0.188026	1.61212343154083
262	Q9WTY4	Aqp5	21.1701	22.1659	-0.99584	0.501444	DOWN	0.0244331	0.188026	1.61202224516525
8689	Q8R1M0	Hmces	15.7196	12.2917	3.42785	10.7618	UP	0.0244717	0.188161	1.61133538086871
5801	Q9CY57	Chtop	17.6164	17.4506	0.165845	1.12182	NOT	0.0245556	0.188614	1.60984982111126
844	Q63ZW7	Patj	18.7906	19.3025	-0.511868	0.701314	DOWN	0.0245751	0.188614	1.60950394637761
8224	P97449	Anpep	20.3397	19.6528	0.686943	1.60987	UP	0.0246042	0.188614	1.6089904866188
7778	Q9D2C2	Saal1	16.8191	16.3499	0.4692	1.38434	UP	0.0246156	0.188614	1.60878881527597
1610	Q9CZJ1	Utp11	16.1559	16.4574	-0.301567	0.81137	DOWN	0.0246401	0.188638	1.6083573753228
770	P21279	Gnaq	20.1591	20.6998	-0.54071	0.687433	DOWN	0.0247198	0.189085	1.60695455538382
485	Q64727	Vcl	22.7923	23.5008	-0.70843	0.611986	DOWN	0.024775	0.189131	1.60598600378146
1203	Q9CPU0	Glo1	21.1787	21.5741	-0.39536	0.7603	DOWN	0.0247965	0.189131	1.60560979020264
756	Q9EQG3	Scel	18.5649	19.1134	-0.548523	0.68372	DOWN	0.0248092	0.189131	1.60538646957022
162	Q9CPW0	Cntnap2	13.7166	15.0526	-1.33607	0.396098	DOWN	0.024811	0.189131	1.60535527615805
8221	Q922Q8	Lrrc59	21.0338	20.3522	0.68166	1.60398	UP	0.0248744	0.189409	1.60424754328886
6751	Q8BG81	Poldip3	18.4182	18.1449	0.273298	1.20857	UP	0.0248902	0.189409	1.60397096810406
957	Q80Y17	Llgl1	17.2533	17.7223	-0.468963	0.722484	DOWN	0.0249288	0.18954	1.6032982782398
7890	Q8BHS6	Armcx3	16.0365	15.5302	0.50623	1.42033	UP	0.0249626	0.189634	1.60271073906728
7219	Q02819	Nucb1	20.796	20.4546	0.34139	1.26698	UP	0.0250731	0.190158	1.60079212310223
8667	Q9CY94	Gins3	15.0183	11.8239	3.19435	9.1537	UP	0.0250744	0.190158	1.60076990065009
7713	P19973	Lsp1	21.7375	21.2846	0.45289	1.36878	UP	0.0251213	0.190326	1.59995840872266
1100	Q8BGV3	Tacstd2	18.0631	18.4858	-0.422635	0.746061	DOWN	0.0251394	0.190326	1.59964509179719
8493	P51569	Gla	18.0391	16.925	1.11415	2.16467	UP	0.0251961	0.190593	1.59866660771489
527	Q6W8Q3	Pcp4l1	18.7412	19.4175	-0.676268	0.625782	DOWN	0.0252516	0.190722	1.59771060000508
5602	Q3UGS4	Mcrip1	18.2462	18.0985	0.14775	1.10784	NOT	0.0252562	0.190722	1.59763123538644
8383	Q5RL79	Krtcap2	20.294	19.4132	0.88084	1.84145	UP	0.0253465	0.191241	1.5960819165617
973	O88952	Lin7c	19.5619	20.0237	-0.461828	0.726066	DOWN	0.0254752	0.191924	1.59388289214559
1448	Q8BH44	Coro2b	16.9152	17.2531	-0.337882	0.791202	DOWN	0.0254803	0.191924	1.59379529256626
7791	P62918	Rpl8	21.4398	20.9674	0.472347	1.38737	UP	0.025515	0.192023	1.59320388265549
6392	Q9DAU1	Cnpy3	18.1329	17.9037	0.229142	1.17214	NOT	0.025547	0.192042	1.59266039800141
835	P97333	Nrp1	19.5876	20.1036	-0.516053	0.699283	DOWN	0.0255682	0.192042	1.59230016793623
8158	P14106	C1qb	18.0358	17.4043	0.631578	1.54926	UP	0.0256409	0.192042	1.5910674803283
6983	O09005	Degs1	17.9443	17.6392	0.30507	1.23548	UP	0.0256831	0.192042	1.5903523881554
1475	P20444	Prkca	19.1519	19.4834	-0.331452	0.794736	DOWN	0.0256902	0.192042	1.59023256542284
478	O88492	Plin4	18.4988	19.2123	-0.71355	0.609818	DOWN	0.0256946	0.192042	1.59015876417466
2041	Q6P9Q4	Fhod1	19.78	20.0074	-0.227425	0.854158	NOT	0.0257118	0.192042	1.58986834639318
847	E9Q8Q6	Ccdc141	17.5723	18.0832	-0.510853	0.701808	DOWN	0.0257593	0.192042	1.58906604411137
6702	P70699	Gaa	18.7419	18.4744	0.267473	1.2037	UP	0.0257753	0.192042	1.58879679356701
1056	Q3U0S6	Rasip1	20.4378	20.8722	-0.43446	0.739971	DOWN	0.0257855	0.192042	1.58862508290171
7510	Q99L45	Eif2s2	19.7828	19.3771	0.4057	1.32473	UP	0.0257947	0.192042	1.58846948506159
6036	P80318	Cct3	21.8182	21.6289	0.189202	1.14013	NOT	0.0257988	0.192042	1.58840056158551
7398	Q9D0L8	Rnmt	18.4668	18.0904	0.376415	1.29811	UP	0.0258064	0.192042	1.58827282786641
1732	P62835	Rap1a	23.2335	23.5092	-0.27571	0.826044	DOWN	0.0258206	0.192042	1.58803377105663
437	Q8VCN6	Cd99	15.2637	16.0197	-0.756027	0.592125	DOWN	0.0258844	0.192325	1.58696263574782
7592	P70670	Naca	21.0176	20.5977	0.419942	1.33787	UP	0.0259019	0.192325	1.58666774050492
8469	Q91W90	Txndc5	21.2413	20.1876	1.05369	2.07584	UP	0.0259772	0.192626	1.58540841428908
5592	Q4FZC9	Syne3	16.8936	16.7469	0.146742	1.10707	NOT	0.0260541	0.192626	1.58412464105826
6093	Q8C0C7	Farsa	19.9942	19.7986	0.195598	1.1452	NOT	0.0261194	0.192626	1.58303680364819
78	Q9D5R3	Cep83	10.8956	14.3005	-3.40493	0.0944091	DOWN	0.0261573	0.192626	1.58240708663285
8485	Q6ZPK0	Phf21a	15.4854	14.4002	1.08519	2.12165	UP	0.0261841	0.192626	1.58196178514767
8824	Q8BHT7	Rgp1	17.1544	12.2295	4.92493	30.3774	UP	0.0261863	0.192626	1.58192542978608
556	P13634	Ca1	21.7672	22.4213	-0.65412	0.635463	DOWN	0.0262118	0.192626	1.58150393316373
1933	O35495	Cdk14	17.6766	17.9215	-0.244987	0.843823	NOT	0.0262196	0.192626	1.58137438531008
8472	Q75N73	Slc39a14	15.9465	14.8878	1.05864	2.08297	UP	0.0262297	0.192626	1.58120629576903
247	Q9Z1S5	Septin3	14.0451	15.0745	-1.02936	0.489927	DOWN	0.0262298	0.192626	1.58120507052749
658	Q7TNC9	Inpp5a	17.9496	18.5423	-0.592675	0.663112	DOWN	0.026238	0.192626	1.58106880881243
10	Q9D180	Cfap57	12.139	19.0589	-6.91989	0.00825858	DOWN	0.0262405	0.192626	1.58102789394683
7309	Q9CZ83	Mrpl55	16.3275	15.9701	0.357388	1.2811	UP	0.026253	0.192626	1.58082149154834
8678	Q3V1D3	Ampd1	15.4654	12.1444	3.32099	9.9935	UP	0.0262684	0.192626	1.58056558556745
5374	O88738	Birc6	18.4014	18.2744	0.127048	1.09206	NOT	0.0262769	0.192626	1.58042595433428
7643	P23591	Gfus	19.5421	19.1091	0.432975	1.35001	UP	0.0262899	0.192626	1.58021080152372
5765	Q61792	Lasp1	22.4362	22.2735	0.162648	1.11934	NOT	0.026345	0.192699	1.5793
488	Q08091	Cnn1	21.0893	21.7915	-0.702195	0.614636	DOWN	0.0263565	0.192699	1.57911160308922
5803	Q9D906	Atg7	19.788	19.6221	0.165958	1.12191	NOT	0.0263768	0.192699	1.57877853578707
1728	Q80VP0	Tecpr1	18.4074	18.6837	-0.276307	0.825702	DOWN	0.0263983	0.192699	1.57842451706007
1574	B1AXH1	Nhsl2	16.492	16.7997	-0.307625	0.807971	DOWN	0.0264166	0.192699	1.57812248799537
5922	Q80TP3	Ubr5	16.0118	15.8341	0.177772	1.13114	NOT	0.0264302	0.192699	1.57790025707142
6378	A2RSJ4	Bltp3b	15.6103	15.3824	0.22787	1.1711	NOT	0.0264566	0.192733	1.57746647764595
6718	Q9Z130	Hnrnpdl	18.5934	18.3242	0.2692	1.20514	UP	0.0264831	0.192768	1.57703155675176
954	Q8K354	Cbr3	20.114	20.5853	-0.471322	0.721303	DOWN	0.0265351	0.192791	1.57618007332582
8405	Q8K1X4	Nckap1l	19.0133	18.0986	0.914682	1.88515	UP	0.0265744	0.192791	1.57553679372852
831	Q00731	Vegfa	16.7766	17.2934	-0.516803	0.698919	DOWN	0.0265757	0.192791	1.57551595741558
749	Q9D952	Evpl	18.8236	19.3754	-0.551858	0.682141	DOWN	0.0265904	0.192791	1.5752757664953
64	Q9D384	Snrnp35	11.4595	15.5739	-4.11435	0.0577374	DOWN	0.0265948	0.192791	1.57520332033179
8150	O88188	Ly86	16.1658	15.5402	0.6257	1.54296	UP	0.0266215	0.192827	1.57476762448347
929	Q925F2	Esam	20.1119	20.5918	-0.479938	0.717009	DOWN	0.0266645	0.192981	1.5740665393006
8292	P08030	Aprt	19.8894	19.1361	0.753297	1.68564	UP	0.026714	0.193113	1.57326158233644
5854	O35286	Dhx15	19.8534	19.6832	0.170217	1.12523	NOT	0.0267263	0.193113	1.57306094974322
8323	Q8R3Y5		15.7353	14.956	0.77928	1.71627	UP	0.0267739	0.1933	1.57228773041488
338	O08532	Cacna2d1	18.7085	19.5809	-0.8724	0.546237	DOWN	0.0268382	0.193606	1.57124740795751
8042	Q9EPR5	Sorcs2	17.3989	16.8339	0.565002	1.47939	UP	0.0269117	0.193979	1.57005825394803
134	A2AQP0	Myh7b	21.0934	22.7047	-1.61129	0.327305	DOWN	0.0269428	0.194045	1.56955775627924
6767	Q924K8	Mta3	18.649	18.3737	0.275292	1.21024	UP	0.026966	0.194055	1.56918361476306
978	Q9QXY6	Ehd3	21.7648	22.2255	-0.4607	0.726634	DOWN	0.0270703	0.19453	1.5675069151969
1723	P62743	Ap2s1	20.7816	21.0587	-0.27705	0.825277	DOWN	0.027087	0.19453	1.56723917242368
7368	Q8BGQ7	Aars1	19.539	19.1683	0.370723	1.293	UP	0.0271014	0.19453	1.5670083058774
8597	Q8BXB6	Slco2b1	13.6568	11.8773	1.77957	3.43325	UP	0.0271198	0.19453	1.56671427023364
5552	O54833	Csnk2a2	18.1266	17.9839	0.142678	1.10395	NOT	0.0271528	0.19461	1.5661856351782
1292	Q9QYB5	Add3	20.5418	20.9147	-0.372918	0.772219	DOWN	0.0271783	0.194635	1.56577844688688
846	P46735	Myo1b	21.5033	22.0144	-0.51111	0.701682	DOWN	0.0272752	0.19479	1.56423283640286
554	P61953	Gng11	17.9659	18.6208	-0.65487	0.635133	DOWN	0.0272911	0.19479	1.56397867278429
1084	Q61003	Cd6	17.5914	18.0172	-0.4258	0.744426	DOWN	0.0273104	0.19479	1.56367170041535
7838	Q9JJI8	Rpl38	20.8767	20.39	0.486658	1.40119	UP	0.0273285	0.19479	1.56338482487621
1661	G5E829	Atp2b1	20.1883	20.4791	-0.290812	0.817442	DOWN	0.0273677	0.19479	1.56276144555614
7639	Q9R0Q3	Tmed2	19.6041	19.1713	0.432862	1.34991	UP	0.0273721	0.19479	1.56269165991247
666	Q8BH64	Ehd2	23.308	23.8963	-0.588368	0.665095	DOWN	0.0273754	0.19479	1.56264006573291
8306	Q60766	Irgm1	20.1713	19.4065	0.764715	1.69903	UP	0.027376	0.19479	1.56263048372501
5986	Q9Z315	Sart1	17.8372	17.6538	0.183465	1.13561	NOT	0.0274037	0.19479	1.5621906529015
465	Q07079	Igfbp5	16.412	17.1397	-0.727645	0.603889	DOWN	0.0274225	0.19479	1.56189347747166
7225	Q9DB90	Smg9	16.6648	16.3221	0.342705	1.26813	UP	0.0274491	0.19479	1.56147211211608
5876	Q6ZQH8	Nup188	16.768	16.5957	0.172313	1.12686	NOT	0.0274707	0.19479	1.56113027387889
7544	P35821	Ptpn1	19.589	19.177	0.41203	1.33056	UP	0.0274874	0.19479	1.56086652720209
1544	Q923Q2	Stard13	17.7273	18.0415	-0.314252	0.804268	DOWN	0.0275072	0.19479	1.56055336224647
8753	Q8BGW0	Themis	16.4693	12.3548	4.11456	17.3223	UP	0.0276172	0.195319	1.5588209210647
8590	P01660		18.9371	17.286	1.65115	3.14083	UP	0.0276835	0.195319	1.55777867383876
6668	Q8K358	Pigu	17.6791	17.4173	0.261817	1.19899	NOT	0.0276859	0.195319	1.55774105604207
256	P15806	Tcf3	12.4945	13.5017	-1.00714	0.497532	DOWN	0.0277124	0.195319	1.55732584535172
8069	P56677	St14	17.2328	16.6552	0.57756	1.49232	UP	0.0277259	0.195319	1.55711464509369
6345	E9Q1P8	Irf2bp2	18.1201	17.8956	0.224455	1.16834	NOT	0.0277392	0.195319	1.55690583331292
7627	Q8BH04	Pck2	20.5809	20.1515	0.429445	1.34672	UP	0.0277473	0.195319	1.55677875376819
7546	Q99KF1	Tmed9	21.8797	21.4676	0.4121	1.33062	UP	0.027792	0.195319	1.55607943319423
6789	Q8QZY1	Eif3l	20.3527	20.0744	0.27824	1.21271	UP	0.0277982	0.195319	1.55598305918604
119	A2ABU4	Myom3	14.501	16.1958	-1.69479	0.3089	DOWN	0.0278021	0.195319	1.55592253949159
728	Q9WV34	Mpp2	18.5915	19.1559	-0.564392	0.67624	DOWN	0.0279535	0.195972	1.55356371404006
7636	P62889	Rpl30	22.843	22.412	0.430985	1.34815	UP	0.0279761	0.195972	1.55321298355696
8144	Q8BH97	Rcn3	19.7319	19.1084	0.623525	1.54063	UP	0.0279821	0.195972	1.55312028547587
5865	P59326	Ythdf1	18.7646	18.5928	0.171838	1.12649	NOT	0.0279834	0.195972	1.55309908504459
6240	Q62241	Snrpc	19.1535	18.941	0.212545	1.15873	NOT	0.0280733	0.196333	1.55170616202211
506	Q9Z0J1	Reck	17.6869	18.3784	-0.69147	0.619223	DOWN	0.0280915	0.196333	1.55142528662503
8600	P01675		17.1083	15.2694	1.83888	3.57732	UP	0.0281014	0.196333	1.55127269227799
1956	Q8VI36	Pxn	20.1704	20.4113	-0.240927	0.846201	NOT	0.0281369	0.196427	1.55072299660635
855	Q8BZZ3	Wwp1	18.239	18.7468	-0.507765	0.703311	DOWN	0.0281868	0.19662	1.54995495021572
6134	Q8BXZ1	Tmx3	19.1556	18.9566	0.198995	1.1479	NOT	0.0282175	0.196651	1.54948178949364
8002	Q8R1Z9	Rnf121	17.4188	16.8746	0.544218	1.45823	UP	0.0282355	0.196651	1.54920457880824
8422	P48025	Syk	19.1178	18.1801	0.937665	1.91543	UP	0.0283233	0.196762	1.54785650025194
188	Q1XH17	Trim72	16.5239	17.7361	-1.21218	0.431616	DOWN	0.0283248	0.196762	1.5478324426837
7997	Q9CR57	Rpl14	22.9512	22.4077	0.543497	1.4575	UP	0.0283464	0.196762	1.54750221134632
7102	Q91YP2	Nln	18.8952	18.5721	0.323035	1.25096	UP	0.0283879	0.196762	1.54686616725119
884	P98203	Arvcf	17.0419	17.541	-0.499078	0.707559	DOWN	0.0284497	0.196762	1.54592204933744
6405	Q8K2F8	Lsm14a	19.2023	18.9716	0.2307	1.1734	NOT	0.0284616	0.196762	1.54574075026161
7277	Q9CQC6	Bzw1	20.1859	19.8346	0.351255	1.27567	UP	0.0284624	0.196762	1.54572846696893
2434	Q06138	Cab39	19.6825	19.8529	-0.170373	0.888613	NOT	0.0284627	0.196762	1.54572459131887
7832	Q99J77	Nans	20.393	19.9084	0.48463	1.39923	UP	0.0285124	0.196762	1.54496659045297
1834	Q9R0D8	Wdr54	16.4671	16.728	-0.26088	0.834579	NOT	0.0285404	0.196762	1.54453924447206
8110	Q99LC9	Pex6	16.4096	15.813	0.596662	1.51221	UP	0.0285422	0.196762	1.54451252457951
7977	O35522	Psmb9	20.0691	19.5324	0.536693	1.45064	UP	0.0285485	0.196762	1.54441693377883
5740	Q02053	Uba1	22.4698	22.3111	0.158722	1.1163	NOT	0.0285678	0.196762	1.54412244314093
6223	Q6NV83	U2surp	19.0309	18.8195	0.211425	1.15783	NOT	0.0285928	0.196762	1.54374340464569
701	Q8CIB5	Fermt2	21.7305	22.306	-0.575465	0.67107	DOWN	0.0285993	0.196762	1.54364424732005
8818	Q9D9S3	Rwdd2a	17.0279	12.1505	4.87736	29.3921	UP	0.0286297	0.196762	1.54318339996708
8161	Q5SUA5	Myo1g	19.2734	18.6383	0.63509	1.55303	UP	0.0286423	0.196762	1.54299208043816
8036	P62900	Rpl31	22.1209	21.5575	0.563447	1.4778	UP	0.0286506	0.196762	1.54286697590194
8685	Q9Z100	Cpxm1	15.544	12.1427	3.40125	10.5652	UP	0.0287008	0.196873	1.54210601279699
2204	Q9JI39	Abcb10	17.4161	17.6175	-0.201385	0.869715	NOT	0.0287111	0.196873	1.54194971439632
1440	P18293	Npr1	17.2196	17.5592	-0.339565	0.79028	DOWN	0.0287628	0.197069	1.54117
4775	B9EJR8	Dnaaf5	17.6175	17.5454	0.072045	1.05121	NOT	0.028813	0.197069	1.54041146047653
460	Q8BW41	Pomgnt2	16.7512	17.4824	-0.73115	0.602424	DOWN	0.0288231	0.197069	1.54026004981167
1595	Q3U182	Crtc2	15.9812	16.2861	-0.304905	0.809496	DOWN	0.0288285	0.197069	1.54017735157639
7255	Q6P1H1	Cyb561a3	18.694	18.3465	0.347513	1.27236	UP	0.0288698	0.197186	1.53955658578819
7066	Q9R020	Zranb2	18.5288	18.2118	0.317085	1.24581	UP	0.0289048	0.197186	1.5390292800284
8300	O08807	Prdx4	23.3198	22.5577	0.762118	1.69598	UP	0.0289123	0.197186	1.53891798931703
1821	O09172	Gclm	19.4084	19.671	-0.262618	0.833574	NOT	0.0289994	0.197351	1.53761034363034
1069	Q62470	Itga3	21.3177	21.7477	-0.429965	0.74228	DOWN	0.0290016	0.197351	1.53757874550546
7668	Q9CR60	Golt1b	18.3536	17.9132	0.440437	1.35702	UP	0.0290033	0.197351	1.53755295954509
6847	Q9EQG9	Cert1	18.2713	17.9859	0.285355	1.21871	UP	0.0290321	0.197396	1.53712226693161
778	Q9DC11	Plxdc2	20.1109	20.6466	-0.535708	0.68982	DOWN	0.0291182	0.197694	1.53583613156992
6904	Q923D5	Wbp11	17.8375	17.5439	0.29359	1.22569	UP	0.0291232	0.197694	1.53576099678663
1199	Q9D1N2	Gpihbp1	18.8515	19.2472	-0.395688	0.760127	DOWN	0.0291428	0.197694	1.53546939475061
7795	P50427	Sts	19.2024	18.7296	0.472863	1.38786	UP	0.0292104	0.197741	1.53446315004824
240	Q61696	Hspa1a	16.2652	17.3144	-1.04912	0.483263	DOWN	0.029248	0.197741	1.53390416746626
233	P33267	Cyp2f2	22.5037	23.5762	-1.0725	0.475494	DOWN	0.0292845	0.197741	1.53336151930631
8790	Q921J4	Ube2s	16.4329	11.9733	4.45965	22.0033	UP	0.0292979	0.197741	1.53316278132369
8315	Q8VH37	Hdac8	15.687	14.9153	0.77171	1.70729	UP	0.0292997	0.197741	1.53313712281972
7126	P16056	Met	16.6223	16.2965	0.325865	1.25342	UP	0.0293051	0.197741	1.53305722207725
220	P61014	Pln	18.4215	19.5332	-1.11172	0.462744	DOWN	0.0293086	0.197741	1.5330043483481
6358	Q7TPD0	Ints3	17.7512	17.5256	0.225518	1.1692	NOT	0.0293453	0.197741	1.53246144629085
815	Q9Z2D6	Mecp2	19.495	20.0158	-0.520775	0.696997	DOWN	0.0293502	0.197741	1.53238897940016
6419	O09106	Hdac1	20.7737	20.5419	0.2318	1.1743	NOT	0.0293886	0.19777	1.53182114647935
6108	Q99020	Hnrnpab	22.1259	21.9288	0.197123	1.14641	NOT	0.0294201	0.19777	1.53135516161769
8419	P63082	Atp6v0c	17.8576	16.9261	0.93155	1.90732	UP	0.029427	0.19777	1.53125442398082
2943	Q8CAQ8	Immt	20.7136	20.8233	-0.109645	0.926816	NOT	0.029491	0.19777	1.53031083956484
6725	Q3TN34	Micall2	16.2463	15.976	0.27028	1.20604	UP	0.029516	0.19777	1.52994235118845
8330	Q9Z0E6	Gbp2	21.7354	20.9478	0.7876	1.7262	UP	0.0295206	0.19777	1.52987484923823
123	Q02566	Myh6	20.7906	22.4626	-1.67201	0.313815	DOWN	0.0295321	0.19777	1.52970640495546
802	Q9D1G5	Lrrc57	19.4325	19.9575	-0.525055	0.694933	DOWN	0.0295328	0.19777	1.5296951256998
735	Q80XA6	Reps2	18.2833	18.8445	-0.561265	0.677708	DOWN	0.029599	0.198063	1.52872325475201
7808	P97461	Rps5	22.3883	21.9115	0.476778	1.39163	UP	0.029651	0.198079	1.52796028900631
8406	Q9Z0J0	Npc2	23.1905	22.2752	0.915303	1.88596	UP	0.0296783	0.198079	1.52756074532887
1159	Q63739	Ptp4a1	16.5944	16.9998	-0.40536	0.755048	DOWN	0.0296833	0.198079	1.52748718948819
7339	Q9QZD9	Eif3i	19.9883	19.6246	0.363718	1.28674	UP	0.029698	0.198079	1.52727285558197
8196	P0DOV2	Ifi204	19.625	18.9629	0.66217	1.58246	UP	0.0297182	0.198079	1.52697720659815
8615	Q99PM3	Gtf2a1	18.615	16.4206	2.1944	4.577	UP	0.0297728	0.198079	1.52618068463372
7586	Q8BVV7	Cep95	16.0503	15.6309	0.419375	1.33735	UP	0.0298236	0.198079	1.52543967201236
6559	Q99JB2	Stoml2	19.279	19.0307	0.248252	1.18777	NOT	0.0298557	0.198079	1.52497236363945
357	P24456	Cyp2d10	17.7888	18.6233	-0.834542	0.560761	DOWN	0.0298829	0.198079	1.52457741836578
1293	Q8BIK4	Dock9	18.9543	19.3271	-0.372742	0.772313	DOWN	0.029901	0.198079	1.52431364794568
6403	P47753	Capza1	20.3887	20.1582	0.230488	1.17323	NOT	0.0299207	0.198079	1.52402870025409
987	Q5SYD0	Myo1d	20.6883	21.1464	-0.45804	0.727975	DOWN	0.0299419	0.198079	1.52372109407137
530	Q0GA42	Cnnm1	17.7742	18.4469	-0.672685	0.627338	DOWN	0.0300355	0.198079	1.52236452667699
7572	Q9R0A0	Pex14	17.5942	17.1783	0.41589	1.33412	UP	0.030122	0.198079	1.52111609488878
8291	Q8R5A3	Apbb1ip	18.219	17.4669	0.752065	1.6842	UP	0.0301236	0.198079	1.52109358921309
6374	Q99LP6	Grpel1	19.9809	19.7535	0.227357	1.17069	NOT	0.030135	0.198079	1.52092948154323
7426	Q9DBB4	Naa16	17.1838	16.8008	0.383088	1.30413	UP	0.0301414	0.198079	1.52083715589763
7410	Q01320	Top2a	20.0334	19.6554	0.378043	1.29958	UP	0.0301562	0.198079	1.52062286659681
1169	Q8CJ91	Cd209b	17.2347	17.6375	-0.402803	0.756388	DOWN	0.0301879	0.198079	1.52016653624756
430	Q9CU65	Zmym2	15.7112	16.4723	-0.761125	0.590036	DOWN	0.0302191	0.198079	1.51971910652229
7489	Q80U87	Usp8	18.2724	17.8715	0.400905	1.32034	UP	0.0302297	0.198079	1.51956594724861
2074	Q8BTU1	Cfap20	18.5959	18.8176	-0.221725	0.857539	NOT	0.030258	0.198079	1.51915907815851
5224	A2A4P0	Dhx8	16.6492	16.537	0.112213	1.08088	NOT	0.0302631	0.198079	1.51908614221899
688	Q61235	Sntb2	19.9497	20.53	-0.58039	0.668783	DOWN	0.0302693	0.198079	1.5189970340543
545	Q6P9J5	Kank4	17.7575	18.419	-0.661547	0.6322	DOWN	0.0302758	0.198079	1.51890385594134
1682	P49182	Serpind1	18.4785	18.7666	-0.288108	0.818976	DOWN	0.0303042	0.198079	1.51849730541492
1031	Q80UW5	Cdc42bpg	19.4895	19.9341	-0.444657	0.734759	DOWN	0.0303291	0.198079	1.51813987554282
8418	Q99N80	Sytl1	17.3579	16.4265	0.931395	1.90712	UP	0.0303438	0.198079	1.51792970360172
19	Q3U0P5	Entpd6	11.6118	17.6822	-6.07038	0.0148811	DOWN	0.0303629	0.198079	1.51765687949685
2144	P97384	Anxa11	21.7361	21.9465	-0.21043	0.86428	NOT	0.0303759	0.198079	1.51747095997833
7667	P27659	Rpl3	21.657	21.2166	0.44042	1.357	UP	0.0304009	0.198079	1.51711330203878
7123	Q99KE1	Me2	18.9497	18.6241	0.325568	1.25316	UP	0.0304169	0.198079	1.51688546409391
6385	Q9Z2N8	Actl6a	20.0986	19.8703	0.228285	1.17144	NOT	0.0304578	0.198079	1.51630102740416
82	Q5DTT3	Tasor2	11.0328	14.3269	-3.29414	0.101945	DOWN	0.0304675	0.198079	1.51616246747934
6459	Q99MS7	Ehbp1l1	17.2101	16.9739	0.23617	1.17786	NOT	0.0305149	0.198079	1.51548864667937
5622	Q7TNC4	Luc7l2	19.612	19.4628	0.149207	1.10896	NOT	0.0305535	0.198079	1.51493863476781
1517	Q80TS3	Adgrl3	16.6776	16.9962	-0.318553	0.801874	DOWN	0.0305648	0.198079	1.51477892476534
682	B2RX12	Abcc3	18.4289	19.0103	-0.581333	0.668346	DOWN	0.0305841	0.198079	1.51450375538586
42	Q80XI7	Bpifb9a	11.7072	16.5554	-4.84812	0.0347191	DOWN	0.0305859	0.198079	1.51447909070203
7867	Q8JZK9	Hmgcs1	18.096	17.6012	0.49486	1.40918	UP	0.0306291	0.198079	1.51386522543016
8478	P97808	Fxyd5	16.213	15.1374	1.07558	2.10757	UP	0.0306372	0.198079	1.51375080075968
7872	O08528	Hk2	18.9469	18.4508	0.49601	1.41031	UP	0.0306417	0.198079	1.51368779570766
6900	O35954	Pitpnm1	17.3212	17.0285	0.292662	1.2249	UP	0.0306424	0.198079	1.51367664143485
6245	O88967	Yme1l1	18.2041	17.9913	0.21276	1.1589	NOT	0.0306989	0.198079	1.51287727072312
6567	Q99NB9	Sf3b1	20.3694	20.1204	0.248988	1.18837	NOT	0.0307131	0.198079	1.51267689768389
7323	Q6NWW9	Fndc3b	17.308	16.9482	0.359805	1.28325	UP	0.0307162	0.198079	1.51263232947987
7550	Q9R0E2	Plod1	17.9543	17.542	0.412347	1.33085	UP	0.0307263	0.198079	1.51248969107093
141	Q6P8G8	Orai3	13.6881	15.2165	-1.52833	0.346677	DOWN	0.0307628	0.198079	1.5119739686019
8787	Q6P3A9	Arl11	16.834	12.3812	4.45282	21.8994	UP	0.0307807	0.198079	1.51172194526312
8005	Q9D8T2	Gsdmd	19.6528	19.1078	0.54505	1.45907	UP	0.0308225	0.198079	1.51113235009906
1107	Q64518	Atp2a3	21.1505	21.5704	-0.41996	0.747445	DOWN	0.0308525	0.198079	1.51071034283876
7601	Q9WTP6	Ak2	19.324	18.9016	0.422385	1.34014	UP	0.0308566	0.198079	1.51065239375866
8043	Q9JKN1	Slc30a7	18.7293	18.1641	0.565237	1.47963	UP	0.0308568	0.198079	1.51064964921626
305	P35546	Ret	17.6166	18.5417	-0.925068	0.526656	DOWN	0.0308783	0.198079	1.51034677240513
7529	Q9JM76	Arpc3	21.6272	21.2184	0.408805	1.32759	UP	0.0308954	0.198079	1.51010623386864
1881	Q8BGU5	Ccny	17.9041	18.157	-0.25286	0.839231	NOT	0.0309095	0.198079	1.50990748621946
6275	Q8VH51	Rbm39	19.6158	19.3994	0.216333	1.16178	NOT	0.0309221	0.198079	1.50973045789631
6741	Q91VR5	Ddx1	20.5118	20.2398	0.272025	1.2075	UP	0.0309405	0.198079	1.50947268639622
7736	Q6ZWN5	Rps9	22.9344	22.4764	0.45799	1.37363	UP	0.0309625	0.198079	1.50916393832671
7004	Q9EQC5	Scyl1	17.1227	16.8147	0.308003	1.23799	UP	0.0309696	0.198079	1.50906461425631
54	Q9Z0S6	Cldn10	11.3572	15.9734	-4.61625	0.0407727	DOWN	0.0309838	0.198079	1.50886498297414
3495	P59016	Vps33b	17.7291	17.78	-0.0508675	0.965356	NOT	0.0309955	0.198079	1.50870097517799
619	Q8K2P6	Rfesd	15.6915	16.3056	-0.614132	0.653323	DOWN	0.0310077	0.198079	1.50853004024075
18	Q9JIF9	Myot	11.6948	17.834	-6.13927	0.0141872	DOWN	0.0310751	0.198225	1.50758707380203
7912	Q9WVK0	Agtrap	17.7491	17.2368	0.5123	1.42632	UP	0.0310935	0.198225	1.50733108777231
8357	P26151	Fcgr1	18.0339	17.2015	0.832385	1.78063	UP	0.0310977	0.198225	1.50727221919457
8219	Q99PL5	Rrbp1	21.1605	20.4838	0.676745	1.59853	UP	0.0311457	0.198389	1.50660255927294
6717	O35658	C1qbp	19.3106	19.0415	0.269093	1.20505	UP	0.0311937	0.198552	1.50593290007701
8651	Q9JIP4	Panx1	14.0107	11.107	2.90364	7.48313	UP	0.0312251	0.198609	1.50549681580129
1395	O08599	Stxbp1	19.2454	19.5959	-0.350477	0.784324	DOWN	0.0312755	0.19868	1.50479521086167
8460	P97310	Mcm2	18.7278	17.6944	1.0334	2.04685	UP	0.0312809	0.19868	1.50472073233934
7337	Q9D7N6	Mrpl30	15.8128	15.4495	0.363295	1.28636	UP	0.0313113	0.198731	1.50429873428591
8384	P36423	Tbxas1	17.9637	17.0815	0.882155	1.84313	UP	0.0313577	0.198883	1.50365559136536
7940	Q9DBP0	Slc34a2	18.9988	18.4786	0.52014	1.43409	UP	0.0314106	0.198907	1.50292427927797
5767	Q62448	Eif4g2	19.5277	19.3649	0.162855	1.1195	NOT	0.031435	0.198907	1.5025858445326
1162	P31001	Des	22.6866	23.0913	-0.404697	0.755395	DOWN	0.0314471	0.198907	1.50241997833097
980	Q8BWF0	Aldh5a1	18.1543	18.6144	-0.460155	0.726908	DOWN	0.0314512	0.198907	1.50236219972281
6334	Q99MR6	Srrt	19.6327	19.4095	0.223178	1.1673	NOT	0.0315585	0.199443	1.50088423907375
7992	Q8BU04	Ubr7	17.04	16.4968	0.543133	1.45713	UP	0.0316031	0.199583	1.5002702734064
624	Q8BXR9	Osbpl6	18.0959	18.7074	-0.611502	0.654515	DOWN	0.0316377	0.199659	1.49979534348937
1149	Q99JY8	Plpp3	19.5356	19.9441	-0.40854	0.753385	DOWN	0.0316952	0.199734	1.49900635271577
7259	Q8K2Z8	Ube2q2	18.9949	18.6467	0.348285	1.27305	UP	0.0317189	0.199734	1.49868136197426
50	Q5DU00	Dcdc2	11.532	16.2229	-4.69092	0.0387162	DOWN	0.031731	0.199734	1.49851621355354
8743	Q8C4U3	Sfrp1	16.2095	12.2076	4.00192	16.0213	UP	0.0317523	0.199734	1.49822474242097
7502	Q9EST5	Anp32b	21.6251	21.2219	0.403207	1.32244	UP	0.0317751	0.199734	1.49791334735099
5776	E9QAT4	Sec16a	19.6028	19.4389	0.163835	1.12026	NOT	0.0317846	0.199734	1.4977836459164
1342	Q9CSB4	Pard3b	16.7499	17.1108	-0.360935	0.77866	DOWN	0.0318261	0.199853	1.49721701363741
5701	Q3U0V2	Tradd	18.7713	18.6161	0.155205	1.11358	NOT	0.0318676	0.199913	1.49665027474953
8489	P09581	Csf1r	18.7287	17.6329	1.09585	2.13739	UP	0.0318806	0.199913	1.49647403133654
7952	Q91VW3	Sh3bgrl3	22.2757	21.7494	0.526297	1.44023	UP	0.0319317	0.200092	1.49577836762345
6885	Q9DB29	Iah1	20.8744	20.5841	0.290375	1.22296	UP	0.0319658	0.200164	1.49531379715004
5935	Q6P1F6	Ppp2r2a	19.494	19.315	0.17899	1.13209	NOT	0.0320129	0.200318	1.49467510409226
166	O08538	Angpt1	19.1388	20.4549	-1.31612	0.401614	DOWN	0.0321097	0.200562	1.49336363028734
8401	Q9D173	Tomm7	16.623	15.7156	0.907462	1.87574	UP	0.0321169	0.200562	1.49326700253891
745	Q9R0M4	Podxl	19.8237	20.3769	-0.5532	0.681507	DOWN	0.032128	0.200562	1.49311645756507
7665	P97371	Psme1	23.4504	23.0102	0.44013	1.35673	UP	0.032151	0.200562	1.49280573069526
7394	Q9DCG2	Cd302	16.3415	15.966	0.37548	1.29727	UP	0.032165	0.200562	1.49261597169098
823	P62071	Rras2	18.3351	18.8548	-0.519702	0.697516	DOWN	0.0322042	0.200666	1.49208695895196
2080	Q99KN1	Arrdc1	17.3566	17.577	-0.22044	0.858304	NOT	0.0322515	0.200732	1.4914502837432
7740	Q3UIR3	Dtx3l	18.7643	18.3054	0.458908	1.3745	UP	0.0322973	0.200732	1.4908336883128
6151	Q3TNH5	Arb2a	18.4014	18.1996	0.201852	1.15017	NOT	0.0323248	0.200732	1.49046377731685
8515	Q61462	Cyba	19.9076	18.7195	1.18814	2.27858	UP	0.0323594	0.200732	1.48999945904029
727	P35802	Gpm6a	17.9626	18.5276	-0.564998	0.675957	DOWN	0.0323852	0.200732	1.48965304105896
7271	Q07113	Igf2r	19.1081	18.7576	0.350513	1.27501	UP	0.0324131	0.200732	1.4892788011682
2821	P63038	Hspd1	21.8637	21.9844	-0.120713	0.919733	NOT	0.0324183	0.200732	1.48920926741001
8708	Q9Z265	Chek2	15.9473	12.3006	3.64664	12.5241	UP	0.0324202	0.200732	1.48918444427746
117	P48787	Tnni3	19.5224	21.2589	-1.7365	0.300096	DOWN	0.0324247	0.200732	1.48912359140746
1185	Q3UBX0	Tmem109	20.9324	21.3312	-0.398835	0.758471	DOWN	0.0324411	0.200732	1.48890456219724
8407	P49717	Mcm4	18.6909	17.7756	0.915323	1.88599	UP	0.0324653	0.200742	1.48858071338764
5900	O88746	Tom1	20.4384	20.2639	0.17449	1.12857	NOT	0.0325269	0.200983	1.48775765929572
479	O54724	Cavin1	23.262	23.9752	-0.713222	0.609956	DOWN	0.0325783	0.20116	1.48707139514854
608	Q9CYT6	Cap2	17.7597	18.3807	-0.621065	0.650191	DOWN	0.0326527	0.201475	1.48608132739538
105	E9Q5G3	Kif23	14.863	16.9646	-2.10157	0.233005	DOWN	0.0326993	0.201475	1.48546115910079
6183	P56959	Fus	20.7727	20.566	0.20674	1.15408	NOT	0.0327227	0.201475	1.48515150627537
974	Q64446	Atp7b	16.8763	17.338	-0.461682	0.726139	DOWN	0.0327563	0.201475	1.48470480206004
582	Q9DD06	Rarres2	16.7294	17.3709	-0.641522	0.641036	DOWN	0.0327705	0.201475	1.48451713105384
7127	Q9WUA2	Farsb	20.123	19.7971	0.32599	1.25352	UP	0.0328123	0.201475	1.48396304843623
7160	Q8CCJ3	Ufl1	19.2569	18.9272	0.329713	1.25676	UP	0.0328485	0.201475	1.48348460278775
124	Q8K442	Abca8a	14.9931	16.6578	-1.6647	0.31541	DOWN	0.0329126	0.201475	1.4826383757472
6054	O70311	Nmt2	17.643	17.452	0.19101	1.14156	NOT	0.0329311	0.201475	1.48239326113198
7825	Q9D8E6	Rpl4	22.6791	22.1974	0.48173	1.39642	UP	0.0329842	0.201475	1.48169450568638
7332	Q9DBG5	Plin3	20.2961	19.9341	0.361965	1.28518	UP	0.0330155	0.201475	1.4812822264451
955	Q8BG95	Ppp1r12b	18.8437	19.3133	-0.469643	0.722144	DOWN	0.0330199	0.201475	1.48122411479693
6976	Q8R3I3	Cog6	17.1878	16.8834	0.304463	1.23496	UP	0.0330531	0.201475	1.48079
8528	Q60991	Cyp7b1	15.5595	14.3089	1.25059	2.37938	UP	0.0330634	0.201475	1.48065279088662
5416	Q810B6	Ankfy1	19.1288	18.9988	0.130087	1.09436	NOT	0.0330778	0.201475	1.4804633567672
7846	Q9JMF7	Dolpp1	18.4437	17.9549	0.488875	1.40335	UP	0.0330781	0.201475	1.48045956236281
6030	A2AT37	Upf2	17.1248	16.9362	0.188532	1.1396	NOT	0.0330866	0.201475	1.48034838396372
5644	Q9D6Z1	Nop56	19.9719	19.8209	0.150945	1.1103	NOT	0.0330988	0.201475	1.48018714775204
8652	Q9CZK6	Anks3	14.7248	11.821	2.90384	7.48417	UP	0.0331034	0.201475	1.48012771307004
6383	P35550	Fbl	21.1581	20.9299	0.228167	1.17135	NOT	0.0331071	0.201475	1.4800784133844
8442	P97311	Mcm6	18.8741	17.8826	0.991542	1.98831	UP	0.0331529	0.201475	1.47947864663851
1021	Q62261	Sptbn1	23.0533	23.5015	-0.448225	0.732944	DOWN	0.0331883	0.201475	1.47901477037372
7285	Q99MP8	Brap	17.5833	17.2306	0.352645	1.2769	UP	0.0332056	0.201475	1.47878855027187
8154	Q920G3	Siglec5	15.9972	15.3672	0.62995	1.54751	UP	0.0332506	0.201475	1.47820068333499
657	P0C605	Prkg1	19.1894	19.7834	-0.593917	0.662541	DOWN	0.0332825	0.201475	1.47778399407796
8736	Q8VDH1	Fbxo21	15.7735	11.805	3.96843	15.6537	UP	0.0332903	0.201475	1.4776824607166
2168	Q9WVB0	Rbpms	19.7531	19.9598	-0.206745	0.86649	NOT	0.0332953	0.201475	1.47761769373749
8251	Q9DCF9	Ssr3	20.651	19.9405	0.710542	1.63642	UP	0.0333167	0.201475	1.47733815210742
5163	Q9Z2E1	Mbd2	18.2681	18.1603	0.107823	1.0776	NOT	0.0333462	0.201475	1.47695363637159
8702	P61208	Arl4c	15.5081	11.9142	3.59386	12.0742	UP	0.0333762	0.201475	1.47656359227359
1386	Q8BR65	Suds3	17.2667	17.6188	-0.35212	0.783432	DOWN	0.0333829	0.201475	1.47647531404382
6870	P35700	Prdx1	23.8501	23.5615	0.288627	1.22148	UP	0.0334125	0.201475	1.47609141817451
8825	Q9R0B6	Lamc3	16.4481	11.5006	4.94754	30.8572	UP	0.0334266	0.201475	1.47590812041021
8105	Q9CQE7	Ergic3	18.6607	18.066	0.59471	1.51017	UP	0.0335327	0.201475	1.47453117857662
8514	Q61093	Cybb	19.5778	18.3902	1.18756	2.27768	UP	0.0335486	0.201475	1.47432544310186
1797	Q8BZ98	Dnm3	20.7081	20.9737	-0.2656	0.831853	DOWN	0.033598	0.201475	1.47368698788019
7159	Q3UQ44	Iqgap2	21.4179	21.0884	0.329515	1.25659	UP	0.0335985	0.201475	1.47367977511337
6315	P48410	Abcd1	18.6612	18.4399	0.22137	1.16584	NOT	0.0336523	0.201475	1.4729855449592
7513	P70318	Tial1	19.0653	18.6594	0.405923	1.32494	UP	0.03366	0.201475	1.47288599157934
71	Q9JI60	Lrat	11.413	15.3495	-3.93647	0.0653136	DOWN	0.0336672	0.201475	1.47279263988939
8508	Q9ESY9	Ifi30	20.5662	19.3942	1.17195	2.25316	UP	0.0337052	0.201475	1.47230367132923
7570	P16045	Lgals1	22.5404	22.1247	0.415768	1.33401	UP	0.0337225	0.201475	1.47207992757489
7317	Q6P5E6	Gga2	18.101	17.7426	0.358393	1.282	UP	0.0337426	0.201475	1.4718209286574
816	Q8BGA5	Krr1	17.0311	17.5513	-0.520273	0.69724	DOWN	0.0337523	0.201475	1.47169655027405
4679	Q3UIA2	Arhgap17	19.6016	19.5388	0.0628275	1.04451	NOT	0.03377	0.201475	1.47146855355385
1146	Q9EQJ9	Magi3	18.9571	19.366	-0.408885	0.753205	DOWN	0.0337805	0.201475	1.47133346370534
7793	P14115	Rpl27a	23.2505	22.778	0.47246	1.38747	UP	0.0337842	0.201475	1.47128679765268
899	O35660	Gstm6	21.0242	21.5155	-0.491235	0.711416	DOWN	0.0338003	0.201475	1.47107995900841
5709	Q501J6	Ddx17	22.6793	22.5235	0.155745	1.114	NOT	0.0338018	0.201475	1.47106014653313
5551	Q8R081	Hnrnpl	21.7639	21.6213	0.14263	1.10392	NOT	0.0338091	0.201475	1.47096654416796
7526	Q8VDV3	Rab3il1	16.6347	16.2266	0.408143	1.32698	UP	0.0338273	0.201475	1.47073239538338
7906	P47911	Rpl6	22.0001	21.4897	0.510367	1.42441	UP	0.033829	0.201475	1.47071126360869
2174	A2ALU4	Shroom2	17.075	17.2805	-0.205567	0.867197	NOT	0.0338493	0.201475	1.4704498333322
8157	Q08775	Runx2	17.4845	16.8532	0.63128	1.54894	UP	0.0338554	0.201475	1.47037220460195
7511	P62301	Rps13	22.6003	22.1946	0.405775	1.3248	UP	0.0338792	0.201481	1.47006743020124
7411	Q9CQA9	Ntpcr	17.6093	17.2309	0.378327	1.29983	UP	0.0339181	0.201514	1.4695680355862
115	Q91Z83	Myh7	21.5481	23.3097	-1.76154	0.294933	DOWN	0.0339301	0.201514	1.4694147451877
108	Q60674	Nr1d2	20.5919	22.5494	-1.95748	0.257478	DOWN	0.0339543	0.201523	1.46910509059076
6738	P20918	Plg	21.2207	20.949	0.271718	1.20724	UP	0.0340061	0.201566	1.46844268710656
316	P11032	Gzma	17.5244	18.4363	-0.911885	0.53149	DOWN	0.0340071	0.201566	1.46843058030895
7025	P84104	Srsf3	22.0102	21.6995	0.31069	1.2403	UP	0.0340373	0.201611	1.46804468060912
6576	Q9DBE8	Alg2	18.1861	17.9362	0.249933	1.18915	NOT	0.0341073	0.201867	1.4671524423611
5350	P70227	Itpr3	18.6189	18.494	0.124985	1.0905	NOT	0.0341261	0.201867	1.4669135954642
377	Q8VE38	Oxnad1	16.2416	17.0617	-0.820128	0.566392	DOWN	0.0341957	0.201929	1.46602888266199
7963	Q9CPY7	Lap3	21.2742	20.7434	0.53086	1.44479	UP	0.0342369	0.201929	1.46550495678213
5830	Q99ME2	Wdr6	17.4386	17.27	0.16855	1.12393	NOT	0.0342615	0.201929	1.46519409614981
4911	P31786	Dbi	20.5167	20.4324	0.0842975	1.06017	NOT	0.0342623	0.201929	1.46518324572487
1211	E9Q6P5	Ttc7b	16.722	17.1163	-0.39427	0.760874	DOWN	0.034271	0.201929	1.46507286819834
136	Q9QVP4	Myl7	20.1032	21.7059	-1.60273	0.329253	DOWN	0.0342979	0.201929	1.46473186243347
6232	Q8CHW4	Eif2b5	18.2569	18.0448	0.212117	1.15839	NOT	0.0343146	0.201929	1.46452167940476
6826	Q8CIH9	Ppat	17.7752	17.4926	0.282655	1.21643	UP	0.0343186	0.201929	1.46447029795745
1633	Q8BH55	Thnsl1	16.2518	16.5461	-0.294293	0.815472	DOWN	0.0345064	0.202717	1.46210005814916
8732	P24288	Bcat1	15.9601	12.0425	3.91763	15.112	UP	0.0345149	0.202717	1.46199335538938
6355	Q6PDM2	Srsf1	22.3096	22.0843	0.225318	1.16903	NOT	0.0345427	0.202717	1.46164356832044
1344	P59764	Dock4	18.4853	18.8457	-0.360435	0.77893	DOWN	0.0345565	0.202717	1.46146992403068
2063	P50247	Ahcy	21.9903	22.2137	-0.223435	0.856524	NOT	0.0345668	0.202717	1.46134097390522
8417	P49710	Hcls1	20.7224	19.7933	0.9291	1.90409	UP	0.034612	0.202848	1.4607731794819
4984	Q8VE97	Srsf4	21.2207	21.1303	0.0904925	1.06473	NOT	0.0346784	0.203103	1.45994063522529
8620	Q99P91	Gpnmb	19.0737	16.7476	2.3261	5.01448	UP	0.0347298	0.203121	1.45929744256358
1449	Q68EF0	Rab3ip	16.3331	16.6708	-0.337707	0.791298	DOWN	0.0347469	0.203121	1.45908384812758
1289	Q04736	Yes1	20.7085	21.0821	-0.373575	0.771867	DOWN	0.0347715	0.203121	1.45877594948231
4767	Q9D7H3	RtcA	18.8848	18.8135	0.0712625	1.05064	NOT	0.0347902	0.203121	1.45854328681202
888	Q3U0B3	Dhrs11	18.3583	18.8549	-0.496585	0.708783	DOWN	0.0347959	0.203121	1.45847172624731
7852	Q8BVE3	Atp6v1h	20.1253	19.6342	0.491098	1.40551	UP	0.0348474	0.203288	1.45782973167554
5880	Q99KI3	Emc3	19.1822	19.0098	0.172453	1.12697	NOT	0.034911	0.203525	1.45703825832303
8852	Q6Q783	Kmt5c	18.1898	12.6626	5.52724	46.1176	UP	0.0349918	0.203755	1.45603329457893
426	P21812	Mcpt4	15.5735	16.3363	-0.762787	0.589357	DOWN	0.0350013	0.203755	1.45591583741935
549	Q9D7V2	Lysmd2	16.287	16.9454	-0.658405	0.633578	DOWN	0.0350193	0.203755	1.45569231604014
7146	Q91X51	Gorasp1	17.5835	17.2561	0.327423	1.25477	UP	0.035043	0.203759	1.45539875852842
7719	P17047	Lamp2	20.1175	19.6638	0.453725	1.36957	UP	0.0351038	0.203979	1.45464604164704
8630	Q01237	Hmgcr	14.6686	12.0685	2.60016	6.06353	UP	0.0351749	0.204258	1.45376768416556
922	Q80XC3	Usp6nl	17.4052	17.8863	-0.481013	0.716475	DOWN	0.0352781	0.204582	1.45249480073461
435	Q99J25	Mrm1	18.8894	19.6458	-0.7564	0.591972	DOWN	0.035284	0.204582	1.45242182964672
37	Q9JL99	Clec1b	11.4827	16.4706	-4.98787	0.031514	DOWN	0.0352998	0.204582	1.45222757066571
6941	Q9R0M6	Rab9a	18.1145	17.8159	0.29858	1.22993	UP	0.03533	0.2046	1.45185594461992
1609	Q8CJ96	Rassf8	16.4385	16.7405	-0.302032	0.811109	DOWN	0.035349	0.2046	1.45162332217779
6970	Q6NZC7	Sec23ip	19.1178	18.8143	0.30356	1.23419	UP	0.0353919	0.204715	1.45109642858647
5609	Q9Z277	Baz1b	19.9501	19.8016	0.148455	1.10838	NOT	0.0354517	0.204927	1.45036245668457
7686	P17225	Ptbp1	22.1369	21.6921	0.444738	1.36107	UP	0.0355357	0.205269	1.4493355895991
1082	Q6PEE2	Ctif	18.0473	18.4734	-0.42607	0.744287	DOWN	0.0356243	0.205269	1.4482535630452
8855	Q9JLZ6	Hic2	18.3851	12.7839	5.60114	48.5413	UP	0.035645	0.205269	1.44800112508954
131	Q00609	Cd80	16.922	18.5677	-1.64572	0.319587	DOWN	0.0356487	0.205269	1.4479559009001
2689	Q9ER64	Osbpl5	20.65	20.7881	-0.13803	0.908759	NOT	0.0356742	0.205269	1.44764572070998
7749	Q9Z1D1	Eif3g	19.353	18.8927	0.46037	1.37589	UP	0.0356983	0.205269	1.44735262322384
771	P52760	Rida	18.8169	19.3566	-0.539748	0.687891	DOWN	0.0357082	0.205269	1.44723215088865
8682	Q9D2X0	Ankrd39	15.408	12.0474	3.36065	10.2721	UP	0.0357411	0.205269	1.44683238916818
1148	P27601	Gna13	20.8312	21.2399	-0.408718	0.753293	DOWN	0.0357533	0.205269	1.44668384269768
1541	Q99PI5	Lpin2	16.7405	17.0551	-0.314547	0.804103	DOWN	0.0357628	0.205269	1.44656877749666
6199	Q8K019	Bclaf1	19.5671	19.3585	0.208675	1.15563	NOT	0.0357698	0.205269	1.44648374308774
7845	P42230	Stat5a	17.4575	16.9688	0.488755	1.40323	UP	0.0357885	0.205269	1.44625652804196
610	Q5DU25	Iqsec2	16.879	17.4997	-0.62078	0.650319	DOWN	0.0358326	0.205389	1.44572154512504
2198	O88735	Map7	17.5544	17.757	-0.202613	0.868976	NOT	0.0358985	0.205512	1.44492423011528
7109	Q9WU56	Pus1	16.7338	16.41	0.32382	1.25164	UP	0.0359004	0.205512	1.44490095445707
7613	Q9D211	Cdkn2aipnl	17.8858	17.4602	0.425595	1.34313	UP	0.0359748	0.205806	1.44400156353313
7492	P99024	Tubb5	23.2067	22.8057	0.40103	1.32045	UP	0.0360586	0.206117	1.44299100658349
8225	O89086	Rbm3	20.4952	19.808	0.68713	1.61008	UP	0.0360758	0.206117	1.44278417387787
304	Q7TME2	Spag5	16.4282	17.3538	-0.925665	0.526438	DOWN	0.0361261	0.206272	1.44217858363948
190	A2ASS6	Ttn	17.2463	18.458	-1.21173	0.431751	DOWN	0.0361632	0.206351	1.4417333749338
6877	P60335	Pcbp1	23.0526	22.7634	0.289253	1.22201	UP	0.0362022	0.206441	1.44126520463054
7341	P54923	Adprh	19.0198	18.656	0.363805	1.28682	UP	0.0363521	0.207162	1.43947099738421
6253	P56380	Nudt2	17.5902	17.3769	0.21333	1.15936	NOT	0.0363892	0.207241	1.43902761142243
7419	Q9R0E1	Plod3	18.7664	18.387	0.379458	1.30085	UP	0.0364477	0.207342	1.43832970543432
609	Q05BC3	Eml1	19.7058	20.3267	-0.620895	0.650267	DOWN	0.0364537	0.207342	1.43825833716677
7545	Q9CQU3	Rer1	20.1462	19.7342	0.412045	1.33057	UP	0.0364892	0.207411	1.43783621752588
820	Q3USZ8	Dipk2a	16.829	17.3489	-0.51987	0.697435	DOWN	0.0365691	0.207732	1.4368861435868
1398	B2RUR8	Otud7b	18.1286	18.4785	-0.34992	0.784628	DOWN	0.0366781	0.208218	1.4355932289582
8829	P11942	Cd3g	17.545	12.5596	4.98546	31.6791	UP	0.0367043	0.208234	1.43528267545723
139	Q6P1G2	Kdm2b	13.2871	14.8418	-1.55476	0.340385	DOWN	0.036734	0.208269	1.43493154188928
245	Q8R2Q6	Tctn3	15.332	16.3681	-1.03618	0.487616	DOWN	0.0368484	0.208639	1.4335808228078
1872	Q8CFI0	Nedd4l	19.4346	19.6892	-0.25462	0.838208	NOT	0.0368613	0.208639	1.43342931709014
8409	O35448	Ppt2	18.5577	17.6401	0.917652	1.88904	UP	0.0368717	0.208639	1.43330677953597
8045	Q99LJ1	Fuca1	18.7081	18.1415	0.566553	1.48098	UP	0.0369035	0.208639	1.43293208949957
763	O09164	Sod3	20.119	20.6638	-0.544782	0.685495	DOWN	0.036936	0.208639	1.43255
754	Q9D832	Dnajb4	19.3455	19.8943	-0.548813	0.683583	DOWN	0.0369403	0.208639	1.43249961715396
7803	Q8VD58	Evi2b	17.6065	17.1312	0.475235	1.39014	UP	0.0370107	0.208904	1.43167216104327
8104	Q9DA77	Tex29	16.28	15.6854	0.59462	1.51007	UP	0.0370547	0.208987	1.43115723762842
1264	Q3UHU5	Mtcl1	21.5181	21.898	-0.379908	0.768487	DOWN	0.0370726	0.208987	1.43094687267278
1477	Q04887	Sox9	17.6289	17.9598	-0.33096	0.795007	DOWN	0.0371659	0.209208	1.42985503046593
8431	P62482	Kcnab2	17.5854	16.6425	0.942995	1.92252	UP	0.0372232	0.209208	1.42918663257168
6455	P20108	Prdx3	21.9791	21.7432	0.235898	1.17764	NOT	0.0372566	0.209208	1.42879652446032
1255	Q8CJF9	Ago3	16.1851	16.5671	-0.382012	0.767366	DOWN	0.0373093	0.209208	1.42818242189434
7303	P51410	Rpl9	21.9645	21.608	0.356438	1.28026	UP	0.0373225	0.209208	1.42802925001741
7689	Q9R0Q9	Mpdu1	19.9018	19.4564	0.4454	1.36169	UP	0.0373252	0.209208	1.42799729801222
2628	O35250	Exoc7	18.7819	18.9266	-0.144728	0.90455	NOT	0.0373262	0.209208	1.42798582565165
8200	O08997	Atox1	20.9289	20.2651	0.66382	1.58427	UP	0.0373356	0.209208	1.42787679517756
7072	Q80WQ6	Rhbdf2	17.0946	16.7771	0.31748	1.24615	UP	0.0373423	0.209208	1.42779880841451
7420	P46061	Rangap1	19.4648	19.0845	0.380327	1.30164	UP	0.0373559	0.209208	1.42764044707868
5942	Q3UEB3	Puf60	18.5979	18.4186	0.179273	1.13231	NOT	0.0373815	0.209208	1.42734375209353
5446	Q9DCD2	Xab2	16.9703	16.8374	0.132963	1.09654	NOT	0.0374339	0.209208	1.42673507496934
7037	Q8R2Y0	Abhd6	17.133	16.8206	0.312447	1.24181	UP	0.037434	0.209208	1.42673367117316
293	Q8CHX7	Rftn2	16.4854	17.4306	-0.945165	0.51937	DOWN	0.0374554	0.209208	1.42648534027312
7801	Q9CQ88	Tspan31	16.7703	16.2964	0.4739	1.38886	UP	0.0374655	0.209208	1.42636792228522
8211	Q9CR20	Ier3ip1	19.5201	18.8495	0.67063	1.59177	UP	0.0375159	0.209218	1.42578453782857
697	Q8BVA4	Lmod1	17.5873	18.1638	-0.576535	0.670572	DOWN	0.0375315	0.209218	1.42560381189719
1049	Q64318	Zeb1	20.2451	20.6822	-0.437125	0.738605	DOWN	0.0375381	0.209218	1.42552817585601
655	P11531	Dmd	18.5816	19.1777	-0.596115	0.661533	DOWN	0.0375958	0.209257	1.42486091198488
1404	P51830	Adcy9	17.2859	17.6332	-0.347345	0.786029	DOWN	0.0376114	0.209257	1.42468073157654
6272	G3X8U3	QNG1	19.5798	19.3638	0.216078	1.16157	NOT	0.037646	0.209257	1.42428093137309
772	Q8VCC8	Rapgef3	16.5083	17.0471	-0.538868	0.688311	DOWN	0.0376665	0.209257	1.42404500961741
122	P97297	Adm	13.4274	15.1004	-1.67292	0.313618	DOWN	0.0377058	0.209257	1.42359201316725
6635	Q8CBG9	Rnf170	16.6046	16.3477	0.256943	1.19494	NOT	0.0377081	0.209257	1.42356533834451
924	Q78IQ7	Slc39a4	18.8607	19.3415	-0.480772	0.716594	DOWN	0.03772	0.209257	1.42342882253514
8365	Q61107	Gbp3	19.99	19.1345	0.855525	1.80942	UP	0.0377336	0.209257	1.42327141337475
8288	P56542	Dnase2	16.9191	16.1696	0.74959	1.68131	UP	0.0378158	0.209545	1.42232674204681
7659	P62270	Rps18	22.9854	22.5477	0.437713	1.35446	UP	0.0378507	0.209545	1.42192567131236
644	Q9CZ42	Naxd	20.3467	20.9479	-0.601195	0.659208	DOWN	0.037903	0.209545	1.4213258874505
6581	Q91ZR1	Rab4b	18.7098	18.4596	0.25018	1.18936	NOT	0.037904	0.209545	1.42131517431858
1905	Q61161	Map4k2	17.2341	17.4829	-0.248795	0.841599	NOT	0.0379271	0.209545	1.42105021439944
6752	O55135	Eif6	19.3766	19.1032	0.273382	1.20864	UP	0.0379501	0.209545	1.42078738436753
1166	P58802	Tbc1d10a	17.9879	18.3911	-0.403232	0.756162	DOWN	0.0379509	0.209545	1.42077788608598
7941	Q6NSU3	Glt8d1	16.8664	16.3455	0.520822	1.43477	UP	0.0380061	0.209719	1.42014653330752
7809	Q8K2M0	Mrpl38	17.8595	17.3826	0.476935	1.39178	UP	0.038038	0.209761	1.41978231448649
130	P19123	Tnnc1	18.3959	20.0424	-1.64648	0.319418	DOWN	0.0380611	0.209761	1.41951904091193
1074	E9PY46	Ift140	16.4073	16.8347	-0.427443	0.743579	DOWN	0.0381459	0.210098	1.41855202021639
1181	O54901	Cd200	19.8072	20.2063	-0.399072	0.758346	DOWN	0.0381988	0.210259	1.41794997308957
5619	P26262	Klkb1	18.5402	18.3912	0.149035	1.10883	NOT	0.0382363	0.210335	1.41752433268907
865	Q9CZS1	Aldh1b1	17.718	18.2225	-0.504513	0.704899	DOWN	0.0382618	0.210345	1.41724
841	P37040	Por	22.3103	22.8232	-0.512973	0.700777	DOWN	0.0383101	0.210425	1.41668713382925
8201	Q9ESB3	Hrg	20.7734	20.1093	0.664068	1.58454	UP	0.0383384	0.210425	1.41636553998563
1844	Q9ESK9	Rb1cc1	15.7932	16.0528	-0.259578	0.835333	NOT	0.0383946	0.210425	1.41572992045662
6078	Q9DAW6	Prpf4	18.7358	18.5424	0.193337	1.14341	NOT	0.03844	0.210425	1.41521636114995
6995	Q9DBS9	Osbpl3	17.6523	17.3453	0.307028	1.23716	UP	0.0385246	0.210425	1.41426145602131
8165	Q9D773	Mrpl2	16.9932	16.3528	0.640358	1.55872	UP	0.0385343	0.210425	1.41415288649191
6868	Q5SVD0	Rflnb	16.608	16.3196	0.288322	1.22122	UP	0.0385483	0.210425	1.41399476980236
8670	Q8BW00	Ptrh1	15.373	12.1448	3.22814	9.37059	UP	0.0385682	0.210425	1.41377109111123
690	P49817	Cav1	22.9035	23.4834	-0.579855	0.669031	DOWN	0.0385686	0.210425	1.41376584377739
6850	Q9JJ80	Rpf2	16.337	16.0515	0.285498	1.21883	UP	0.0385857	0.210425	1.41357406683021
7512	P26638	Sars1	19.8707	19.4649	0.405855	1.32487	UP	0.0385947	0.210425	1.41347199294929
194	Q7TQI0	Tmem204	16.0024	17.1962	-1.19376	0.437163	DOWN	0.0386088	0.210425	1.41331388769775
1479	Q3UU96	Cdc42bpa	17.922	18.2524	-0.330425	0.795302	DOWN	0.0386304	0.210425	1.41307112093933
6688	P46460	Nsf	20.8815	20.616	0.26551	1.20206	UP	0.0386335	0.210425	1.41303594518598
6794	Q9QZ08	Nagk	19.308	19.0292	0.278797	1.21318	UP	0.0386663	0.210425	1.41266784432853
1420	Q9JMB0	Gkap1	14.9916	15.3345	-0.34289	0.78846	DOWN	0.0386772	0.210425	1.41254522082838
69	Q91XF4	Rnf167	11.4237	15.4087	-3.98503	0.0631517	DOWN	0.0386794	0.210425	1.41251981102052
252	Q8BI79	Ccdc40	14.8593	15.8778	-1.01842	0.493656	DOWN	0.0387662	0.210557	1.4115466895668
1034	Q6RHR9	Magi1	17.8467	18.29	-0.44328	0.735461	DOWN	0.0387706	0.210557	1.41149701868684
226	O55026	Entpd2	18.3637	19.4649	-1.10123	0.466118	DOWN	0.038786	0.210557	1.41132468215988
692	Q8K0U4	Hspa12a	18.2792	18.8571	-0.577978	0.669902	DOWN	0.0387987	0.210557	1.41118270262451
349	Q8R3P7	Cluap1	15.9185	16.7729	-0.854345	0.553116	DOWN	0.0388869	0.210814	1.41019634167351
4636	P58742	Aaas	18.0035	17.9457	0.057885	1.04094	NOT	0.0388936	0.210814	1.41012165560927
6737	Q9EPL9	Acox3	19.1846	18.9129	0.271713	1.20724	UP	0.0389417	0.210946	1.40958507097072
1476	Q9D8H7	Oma1	16.9073	17.2387	-0.33144	0.794743	DOWN	0.0389937	0.210999	1.40900578779168
7913	P83882	Rpl36a	21.0174	20.5041	0.513323	1.42733	UP	0.0390086	0.210999	1.40883933543077
7497	Q9D8B3	Chmp4b	20.1432	19.741	0.40222	1.32154	UP	0.0390227	0.210999	1.40868230645564
1599	O35245	Pkd2	16.5243	16.8274	-0.303133	0.810491	DOWN	0.0391601	0.211613	1.40715575314541
8799	B2RXV4	Flvcr1	16.9738	12.3982	4.57559	23.8445	UP	0.0391945	0.21167	1.40677433956596
469	Q91WG0	Ces2c	15.7026	16.4255	-0.72284	0.605904	DOWN	0.0392658	0.211925	1.4059860475385
6557	Q80YR5	Safb2	19.369	19.121	0.248053	1.1876	NOT	0.0394085	0.212567	1.4044095883728
1187	Q8C0T5	Sipa1l1	18.7632	19.162	-0.398738	0.758522	DOWN	0.0394843	0.212846	1.40357584297934
1207	B1AUE5	Pex10	14.5241	14.919	-0.394927	0.760528	DOWN	0.039561	0.21305	1.40273247562405
8061	Q61263	Soat1	18.279	17.7056	0.57335	1.48797	UP	0.0395823	0.21305	1.40249900685829
705	Q91YN1	Fam118a	15.2199	15.7932	-0.57329	0.672082	DOWN	0.0395942	0.21305	1.40236812039914
8461	O08811	Ercc2	16.9128	15.8753	1.03757	2.05277	UP	0.0396191	0.213055	1.40209535040918
1652	P62874	Gnb1	23.3804	23.6723	-0.291897	0.816827	DOWN	0.0396806	0.213107	1.4014214631616
1200	P97411	Ica1	16.5461	16.9417	-0.395585	0.760181	DOWN	0.0397081	0.213107	1.40112127587487
8083	P29351	Ptpn6	20.7261	20.1405	0.585597	1.50066	UP	0.0397256	0.213107	1.40092941440031
7628	Q9D1D4	Tmed10	21.3298	20.8998	0.429982	1.34722	UP	0.0397327	0.213107	1.40085193278018
8607	Q148A4	Saxo4	13.8649	11.9451	1.91976	3.78361	UP	0.0397489	0.213107	1.40067445927405
691	Q8VCW8	Acsf2	20.13	20.7085	-0.578575	0.669625	DOWN	0.0398408	0.213378	1.39967199316616
7253	Q9DBP5	Cmpk1	21.536	21.1888	0.347203	1.27209	UP	0.0398835	0.213378	1.39920637758096
202	Q9D9U9	Cfap45	15.3707	16.5404	-1.16963	0.444535	DOWN	0.0399032	0.213378	1.3989924600977
5371	Q4VBE8	Wdr18	18.0424	17.9156	0.126823	1.09189	NOT	0.0399142	0.213378	1.3988729190492
7144	Q6ZQ58	Larp1	18.7704	18.4431	0.3273	1.25466	UP	0.0399198	0.213378	1.39881177376429
59	Q3UI66	Ccdc34	11.5339	15.8231	-4.2892	0.0511471	DOWN	0.0401152	0.214294	1.39669118978614
7712	P55302	Lrpap1	19.719	19.2664	0.452622	1.36853	UP	0.0401593	0.2144	1.39621436326076
6673	Q5SFM8	Rbm27	16.8593	16.5967	0.26269	1.19971	NOT	0.0402065	0.214433	1.39570353641873
751	Q99NB1	Acss1	19.8758	20.4259	-0.550175	0.682937	DOWN	0.0402247	0.214433	1.39550722941716
8484	Q8K2Z4	Ncapd2	16.6998	15.6156	1.08418	2.12017	UP	0.0402379	0.214433	1.39536483332823
992	Q9QYB2	Dach1	16.9168	17.3734	-0.45658	0.728712	DOWN	0.0402672	0.214461	1.39504815838603
7032	Q921L5	Cog2	18.2196	17.9079	0.31169	1.24116	UP	0.040321	0.214618	1.39446853316882
6416	Q01149	Col1a2	20.2317	20.0003	0.23141	1.17398	NOT	0.0404154	0.214813	1.39345306480842
2518	Q8CHC4	Synj1	18.906	19.0635	-0.157535	0.896556	NOT	0.0404397	0.214813	1.39319208560145
7185	Q9JHS3	Lamtor2	17.9902	17.6555	0.334735	1.26115	UP	0.0404539	0.214813	1.39304001137616
6039	Q99PV0	Prpf8	19.912	19.7224	0.18964	1.14048	NOT	0.0404544	0.214813	1.39303407465726
874	Q9Z0X4	Pde3a	18.0647	18.5664	-0.501725	0.706262	DOWN	0.0405425	0.215152	1.39208915325635
1029	Q01730	Rsu1	21.9738	22.4195	-0.44569	0.734233	DOWN	0.0405769	0.215206	1.39172072861556
2095	Q9QYI5	Dnajb2	18.0378	18.2557	-0.21782	0.859864	NOT	0.0406322	0.215242	1.39112976937225
402	Q9WTR5	Cdh13	19.0293	19.8148	-0.785447	0.580172	DOWN	0.0406347	0.215242	1.39110283535373
457	O35098	Dpysl4	22.1585	22.8931	-0.734603	0.600984	DOWN	0.0406566	0.215242	1.39086941304536
911	P52800	Efnb2	17.2616	17.746	-0.484453	0.714768	DOWN	0.0406973	0.215267	1.39043455181961
519	P62881	Gnb5	15.0394	15.7171	-0.677745	0.625142	DOWN	0.0407097	0.215267	1.39030168197882
8136	Q810U4	Nrcam	16.4413	15.8213	0.620073	1.53695	UP	0.0407702	0.215284	1.38965761613915
204	P05125	Nppa	17.2351	18.4027	-1.1676	0.445162	DOWN	0.0407814	0.215284	1.38953803963283
7950	Q9DAM7	Tmem263	17.3355	16.81	0.52549	1.43942	UP	0.0408137	0.215284	1.38919352135079
7985	Q9CPN8	Igf2bp3	18.3019	17.7615	0.540438	1.45441	UP	0.0408147	0.215284	1.38918
1565	Q3LAC4	Prex2	17.1369	17.4459	-0.308947	0.80723	DOWN	0.0408501	0.215284	1.38880691851415
6994	Q60973	Rbbp7	18.4732	18.167	0.306155	1.23641	UP	0.0409737	0.215284	1.38749491208468
7783	Q9CQU0	Txndc12	17.2089	16.7386	0.470272	1.38537	UP	0.0409878	0.215284	1.38734555053613
8830	O88890	Sh2d1a	17.7028	12.6557	5.04709	33.0617	UP	0.0410021	0.215284	1.38719363469834
1919	Q9QWI6	Srcin1	18.0531	18.2998	-0.24672	0.84281	NOT	0.041009	0.215284	1.38712047132981
8217	Q5EBP3	Armc5	15.3681	14.6935	0.674635	1.59619	UP	0.0410428	0.215284	1.38676254251182
6311	Q8C3X8	Lmf2	19.4325	19.2118	0.220752	1.16534	NOT	0.0410562	0.215284	1.38662175743691
1643	Q8C5H8	Nadk2	17.4699	17.7631	-0.293215	0.816081	DOWN	0.041063	0.215284	1.38654961047558
5399	P51125	Cast	20.0616	19.9329	0.128675	1.09329	NOT	0.0410657	0.215284	1.3865210553938
2501	Q8C0E2	Vps26b	19.5627	19.7221	-0.159435	0.895376	NOT	0.041075	0.215284	1.38642220585561
717	Q99JB8	Pacsin3	18.311	18.8792	-0.568178	0.674468	DOWN	0.0410769	0.215284	1.3864022018187
550	Q9JMC8	Epb41l4b	17.0345	17.6928	-0.658323	0.633615	DOWN	0.0411146	0.215323	1.38600387777851
1221	P61148	Fgf1	18.819	19.2109	-0.39188	0.762136	DOWN	0.0411545	0.215323	1.38558236430405
1593	Q9ESN9	Mapk8ip3	16.6076	16.9129	-0.305302	0.809273	DOWN	0.0411571	0.215323	1.3855547696743
8770	Q91ZR4	Nek8	16.8891	12.5847	4.30438	19.7581	UP	0.0412086	0.215465	1.3850126455933
1234	Q3ULD5	Mccc2	19.7451	20.1322	-0.3871	0.764665	DOWN	0.041358	0.216011	1.38344068113938
433	P00920	Ca2	21.4795	22.2367	-0.757245	0.591625	DOWN	0.041376	0.216011	1.38325165424407
1771	Q61140	Bcar1	17.4293	17.6993	-0.269973	0.829335	DOWN	0.0414056	0.216011	1.38294109601393
600	Q8VCP9	Clec14a	18.7881	19.4148	-0.626698	0.647657	DOWN	0.0414475	0.216011	1.38250124065363
8414	B1AQJ2	Usp36	13.9223	13.0008	0.921493	1.89407	UP	0.0414636	0.216011	1.38233291000109
1686	Q3TZZ7	Esyt2	19.8569	20.1438	-0.286977	0.819617	DOWN	0.0414808	0.216011	1.38215244712493
7905	Q8R059	Gale	18.3601	17.85	0.510058	1.42411	UP	0.0415243	0.216011	1.38169807741181
7781	Q8R088	Golph3l	17.925	17.4553	0.469693	1.38481	UP	0.0415314	0.216011	1.38162302099866
1324	G3XA57	Rab11fip2	17.0123	17.3782	-0.365912	0.775978	DOWN	0.0415517	0.216011	1.38141160044802
1788	Q91Z58		16.6759	16.9437	-0.267805	0.830582	DOWN	0.0415566	0.216011	1.38136024276946
7573	Q9WVL2	Stat2	16.8047	16.3885	0.416197	1.33441	UP	0.0415894	0.216056	1.3810172510672
1555	P09055	Itgb1	22.7493	23.0614	-0.312095	0.805471	DOWN	0.0416293	0.216136	1.38060100650485
339	O70165	Fcn1	18.5323	19.4046	-0.872287	0.54628	DOWN	0.0416745	0.216244	1.38012984170846
643	Q9EQ20	Aldh6a1	21.1949	21.798	-0.60302	0.658374	DOWN	0.0417128	0.216298	1.37973080262553
8258	P57759	Erp29	21.5109	20.7913	0.719605	1.64673	UP	0.0417859	0.216298	1.37896973012997
1241	Q9D6Y9	Gbe1	19.0146	19.4001	-0.385518	0.765504	DOWN	0.0418015	0.216298	1.37880780131219
947	Q9R069	Bcam	22.7146	23.1882	-0.473645	0.720143	DOWN	0.0418204	0.216298	1.37861190067571
905	O55126	Nipsnap2	19.8115	20.2999	-0.488345	0.712842	DOWN	0.0418615	0.216298	1.37818505826599
149	P13542	Myh8	16.8391	18.3237	-1.48452	0.357367	DOWN	0.0418722	0.216298	1.37807454184741
7960	Q9CYI4	Luc7l	18.3196	17.7902	0.52947	1.4434	UP	0.0418902	0.216298	1.37788725512084
720	Q99LD8	Ddah2	20.9689	21.5356	-0.566688	0.675165	DOWN	0.0419037	0.216298	1.37774767996073
7816	Q6DTY7	Pfkfb4	18.1192	17.64	0.479197	1.39397	UP	0.0419255	0.216298	1.37752177004883
1458	Q8CAK1	Iba57	17.1679	17.5039	-0.33605	0.792207	DOWN	0.0419681	0.216298	1.37708023661128
44	Q8BLV3	Slc9a7	11.6593	16.454	-4.79478	0.0360269	DOWN	0.04198	0.216298	1.37695718297876
8762	Q91WE4		16.8404	12.6136	4.2268	18.7237	UP	0.0420099	0.216298	1.37664818684508
7617	Q9CXW4	Rpl11	21.9656	21.538	0.427598	1.34499	UP	0.0420286	0.216298	1.37645460105334
7205	Q0VBL3	Rbm15	18.933	18.5945	0.338492	1.26443	UP	0.0420633	0.216298	1.37609706119305
343	Q8K031	Stard8	17.3901	18.2557	-0.865572	0.548829	DOWN	0.0420707	0.216298	1.37602009667797
8696	Q8C6N3	Syt15	15.6683	12.1143	3.55399	11.7451	UP	0.0420749	0.216298	1.37597738235402
5024	Q14C51	Ptcd3	16.5879	16.4944	0.0934425	1.06691	NOT	0.0421139	0.216317	1.37557442500463
46	Q5SS90	Gm11992	11.5509	16.3332	-4.78228	0.0363406	DOWN	0.0421652	0.216317	1.37504627825857
1973	Q5SSZ5	Tns3	19.5379	19.7763	-0.23838	0.847697	NOT	0.0421746	0.216317	1.37494857464253
8840	Q9QYC3	Bhlha15	17.8472	12.6032	5.24399	37.8964	UP	0.0421761	0.216317	1.37493310803429
1429	Q6PGG6	Gnl3l	16.5275	16.8688	-0.341313	0.789323	DOWN	0.0422406	0.216523	1.3742703122575
7699	Q8BH47	Sec22a	16.9359	16.4867	0.449188	1.36527	UP	0.04227	0.216524	1.37396739257078
7468	Q4VAA2	Cdv3	18.8271	18.4316	0.395465	1.31537	UP	0.0422957	0.216524	1.37370382408008
5581	Q99P88	Nup155	19.0777	18.9319	0.145845	1.10638	NOT	0.0423988	0.216524	1.37264606618359
7494	P70669	Phex	16.6929	16.2916	0.401323	1.32072	UP	0.0424231	0.216524	1.37239782450593
5346	P40124	Cap1	22.5095	22.3848	0.124713	1.09029	NOT	0.0424462	0.216524	1.37216150111474
7944	O35955	Psmb10	20.7546	20.2332	0.521393	1.43534	UP	0.042456	0.216524	1.37206136523811
2894	Q99KJ8	Dctn2	21.3196	21.4332	-0.113507	0.924338	NOT	0.0424758	0.216524	1.37185838164679
1265	Q9Z1B3	Plcb1	17.3279	17.7078	-0.37986	0.768512	DOWN	0.0424873	0.216524	1.37174098941471
647	O55234	Psmb5	18.6106	19.2103	-0.59968	0.6599	DOWN	0.0425091	0.216524	1.37151806935807
1007	Q4VAE3	Tmem65	18.8076	19.2602	-0.452518	0.730767	DOWN	0.042518	0.216524	1.37142759119277
7130	Q3TYX3	Smyd5	16.2605	15.9342	0.326288	1.25378	UP	0.0425328	0.216524	1.37127644471104
351	Q8VDV8	Mitd1	15.5963	16.4472	-0.850862	0.554453	DOWN	0.0425429	0.216524	1.37117272534452
5926	Q9QYF9	Ndrg3	17.7423	17.5642	0.178102	1.13139	NOT	0.0425582	0.216524	1.37101714680342
5688	Q9CQ60	Pgls	21.6004	21.4461	0.154333	1.11291	NOT	0.0426121	0.216675	1.37046660383717
6909	Q9Z2G9	Htatip2	17.9921	17.6975	0.294595	1.22654	UP	0.0426841	0.216909	1.36973386112882
6813	Q61703	Itih2	19.4342	19.1534	0.280817	1.21488	UP	0.0427071	0.216909	1.36950030450565
8466	P18181	Cd48	18.1318	17.0858	1.04605	2.06487	UP	0.042797	0.217218	1.36858654133464
6359	P09411	Pgk1	21.8871	21.6616	0.22556	1.16923	NOT	0.0428312	0.217218	1.36823963614593
1765	E9Q557	Dsp	19.0944	19.3656	-0.271203	0.828629	DOWN	0.0428414	0.217218	1.36813634544196
1407	Q9Z2C9	Mtmr7	17.6859	18.0326	-0.346743	0.786358	DOWN	0.0429305	0.217545	1.3672344782615
8033	P45377	Akr1b8	19.3108	18.7502	0.56055	1.47483	UP	0.0429675	0.217595	1.36686033887436
7731	Q80UK8	Ints2	17.1409	16.6843	0.4566	1.3723	UP	0.0429893	0.217595	1.36663991946456
8760	Q8VEF1	Gramd1a	16.7275	12.5136	4.21385	18.5565	UP	0.0430425	0.217642	1.36610225961394
1063	P10630	Eif4a2	20.1221	20.5542	-0.432067	0.741199	DOWN	0.0430477	0.217642	1.36604998702302
24	Q99MB7	Rnf141	11.8652	17.547	-5.68182	0.0194806	DOWN	0.043122	0.217881	1.36530124575779
7514	Q8BP27	Sfr1	17.4394	17.0334	0.405942	1.32495	UP	0.043144	0.217881	1.36507990477102
1880	Q8R5F3	Oard1	17.093	17.346	-0.252947	0.83918	NOT	0.0431828	0.217946	1.3646895531598
8073	P45878	Fkbp2	20.8203	20.239	0.581313	1.49621	UP	0.0432061	0.217946	1.36445538585138
313	P02104	Hbb-y	22.0512	22.964	-0.912795	0.531155	DOWN	0.0432512	0.21805	1.36400177832997
5545	Q62446	Fkbp3	19.5042	19.3622	0.141957	1.1034	NOT	0.0433216	0.218159	1.3632953214459
6365	Q5BLK4	Tut7	17.6178	17.3915	0.22639	1.1699	NOT	0.0433522	0.218159	1.36298838759007
1225	P52795	Efnb1	18.6298	19.0204	-0.3906	0.762812	DOWN	0.0433559	0.218159	1.36295208457163
7737	Q9ES52	Inpp5d	19.8195	19.3613	0.458193	1.37382	UP	0.0433901	0.218159	1.36260920883585
8677	Q8BVE8	Nsd2	15.5858	12.266	3.31974	9.98486	UP	0.0434202	0.218159	1.36230805042334
354	Q9CQ19	Myl9	21.0843	21.9253	-0.84102	0.558249	DOWN	0.0434204	0.218159	1.36230572993609
2338	P70302	Stim1	19.6621	19.8457	-0.183575	0.880518	NOT	0.0434558	0.218213	1.3619526003061
6746	Q8VDS8	Stx18	16.4645	16.1917	0.272803	1.20815	UP	0.0434982	0.218221	1.36152900376506
6778	Q9D1H7	Get4	17.8684	17.5914	0.276923	1.21161	UP	0.0435065	0.218221	1.36144538414821
6925	Q60992	Vav2	17.0533	16.7566	0.296705	1.22834	UP	0.0435533	0.21823	1.36097909279622
43	P07146	Prss2	11.7894	16.6021	-4.81273	0.0355814	DOWN	0.0435635	0.21823	1.36087728506123
6913	A6X919	Dpy19l1	17.108	16.8124	0.295542	1.22735	UP	0.0435914	0.21823	1.36059874440639
95	P07310	Ckm	19.2661	21.7178	-2.45171	0.182795	DOWN	0.0436066	0.21823	1.36044798302847
907	P31809	Ceacam1	18.5199	19.006	-0.48612	0.713943	DOWN	0.0437332	0.21874	1.35918863451461
6945	Q6NZJ6	Eif4g1	20.4848	20.1859	0.29896	1.23026	UP	0.0437726	0.218814	1.3587977159753
6269	Q99JI4	Psmd6	20.1078	19.8918	0.216023	1.16153	NOT	0.0438736	0.219173	1.35779635242391
729	Q9Z224	Mocs2	17.1341	17.6983	-0.564165	0.676347	DOWN	0.0438938	0.219173	1.35759675026938
914	P41971	Elk3	15.829	16.3126	-0.483623	0.71518	DOWN	0.0439681	0.21942	1.35686246912378
8748	Q9DAP7	Asf1b	16.3351	12.264	4.07108	16.808	UP	0.0440652	0.219781	1.35590453035282
726	P49222	Epb42	19.0753	19.6407	-0.565403	0.675767	DOWN	0.0441255	0.219858	1.35530998644249
8553	P01746		21.0663	19.7035	1.3628	2.57183	UP	0.044206	0.219858	1.35451886906889
733	Q9QUG9	Rasgrp2	17.6387	18.2005	-0.561808	0.677453	DOWN	0.0442488	0.219858	1.35409817871404
29	Q8BQB6	Saxo2	11.7282	17.1452	-5.41697	0.0234062	DOWN	0.044258	0.219858	1.35400841180219
6348	P70280	Vamp7	17.5225	17.2979	0.224653	1.1685	NOT	0.0442604	0.219858	1.35398492060646
6417	Q9QYI3	Dnajc7	18.7	18.4685	0.231517	1.17407	NOT	0.0442651	0.219858	1.35393824617399
7889	P62267	Rps23	21.357	20.8511	0.50592	1.42003	UP	0.0442756	0.219858	1.3538354761019
5988	Q5KU39	Vps41	18.1141	17.9305	0.183592	1.13571	NOT	0.0442789	0.219858	1.3538034512625
5520	Q62348	Tsn	19.7958	19.6563	0.139533	1.10155	NOT	0.0443577	0.219908	1.35303060858161
6619	Q3TAS6	Emc10	17.5319	17.2763	0.255622	1.19385	NOT	0.0443817	0.219908	1.35279649709625
6388	Q9JHU9	Isyna1	19.9624	19.7335	0.228862	1.17191	NOT	0.0444601	0.219908	1.35202994577681
1197	Q6X893	Slc44a1	17.3043	17.7007	-0.396388	0.759758	DOWN	0.0444612	0.219908	1.35201849760484
8153	P08121	Col3a1	18.8131	18.184	0.629115	1.54662	UP	0.0444649	0.219908	1.35198265075888
1111	Q9Z111	Gadd45g	17.1627	17.5812	-0.41851	0.748197	DOWN	0.0444765	0.219908	1.35186975741206
7954	A0A0G2JDV3	Gbp6	19.4814	18.9542	0.52718	1.44111	UP	0.0445145	0.219908	1.35149812964697
8838	Q80SY3	Atp6v0d2	17.8492	12.6376	5.21157	37.0543	UP	0.0445203	0.219908	1.35144169347011
8796	Q8C398	Pigw	17.01	12.4962	4.51378	22.8445	UP	0.0445331	0.219908	1.35131726712463
8635	Q3U898	Cops9	14.9221	12.2182	2.70388	6.5155	UP	0.0445368	0.219908	1.35128117581697
546	G3X982	Aox3	20.7555	21.4156	-0.660092	0.632838	DOWN	0.0445946	0.219926	1.35071745452716
8745	Q4FZH1	Entrep1	16.5625	12.5104	4.05212	16.5886	UP	0.0446036	0.219926	1.35063029201457
1092	Q01063	Pde4d	16.5846	17.0091	-0.42448	0.745107	DOWN	0.0446148	0.219926	1.35052136103463
7114	Q9QUJ7	Acsl4	19.5812	19.2567	0.324515	1.25224	UP	0.0447923	0.22063	1.34879617138616
7248	Q3TKT4	Smarca4	19.1863	18.8399	0.346427	1.27141	UP	0.0448166	0.22063	1.34856152057348
7437	E9Q555	Rnf213	18.3242	17.937	0.38724	1.30789	UP	0.0448562	0.22063	1.34817782065958
822	O54890	Itgb3	18.5873	19.107	-0.519745	0.697495	DOWN	0.04486	0.22063	1.3481408856508
8245	Q99LE1	Rilpl2	16.2203	15.5159	0.704448	1.62952	UP	0.044882	0.22063	1.34792803082933
7325	Q9Z1Q5	Clic1	22.5484	22.1879	0.36057	1.28393	UP	0.0451073	0.221615	1.34575328334434
40	Q9CQU5	Zwint	11.9429	16.8583	-4.91533	0.0331389	DOWN	0.0452535	0.22221	1.34434792188873
6928	P23492	Pnp	21.5925	21.2951	0.29748	1.229	UP	0.0453111	0.22237	1.34379567245129
416	Q9D581	Efcab10	16.771	17.5425	-0.7715	0.585808	DOWN	0.0453471	0.222424	1.34345037600685
1133	Q9D115	Znf706	18.2233	18.6362	-0.412845	0.751141	DOWN	0.0454067	0.222505	1.34288040427855
1176	O08966	Slc22a1	18.828	19.2281	-0.400153	0.757778	DOWN	0.0454139	0.222505	1.34281137281562
8004	Q922R5	Ppp4r3b	15.5745	15.0298	0.544702	1.45872	UP	0.0454551	0.222536	1.34241778374524
7291	Q80YV2	Zc3hc1	17.1486	16.7945	0.354105	1.27819	UP	0.0454938	0.222536	1.34204811053604
30	P82350	Sgca	11.6998	17.01	-5.31022	0.0252037	DOWN	0.0454954	0.222536	1.34203284636395
7891	Q8VE96	Slc35f6	17.8132	17.3069	0.506288	1.42039	UP	0.0455877	0.222865	1.34115185155794
5081	Q924W5	Smc6	15.3108	15.212	0.098735	1.07083	NOT	0.0456263	0.222931	1.34078477684918
5316	Q8R3U1	Plaat3	17.6583	17.5358	0.122487	1.08861	NOT	0.0457354	0.223341	1.3397479835347
283	Q9QUT0	Rhag	18.1357	19.0972	-0.96146	0.513537	DOWN	0.0458037	0.223551	1.33909916352019
1992	Q8BIH0	Sap130	16.6837	16.9192	-0.235497	0.849392	NOT	0.0458313	0.223563	1.33883796600231
6124	Q9DC23	Dnajc10	18.6536	18.4553	0.198265	1.14732	NOT	0.0458681	0.22362	1.33848885165983
8634	P31695	Notch4	14.4324	11.731	2.70142	6.50444	UP	0.0459149	0.223724	1.33804596940842
7924	O70251	Eef1b	21.2183	20.7018	0.516522	1.4305	UP	0.0459399	0.223724	1.33780986941172
6614	Q9D0R2	Tars1	20.2554	20.0006	0.254742	1.19312	NOT	0.0461203	0.224401	1.33610750915513
312	Q3UME2	Tmem241	18.3219	19.2366	-0.914735	0.530441	DOWN	0.0461296	0.224401	1.33602045245917
5036	P17742	Ppia	24.2603	24.1657	0.09456	1.06774	NOT	0.046263	0.224927	1.33476644280318
7921	P61961	Ufm1	20.1792	19.6632	0.516018	1.43	UP	0.0463888	0.224944	1.33358655285385
1828	Q8VEB1	Grk5	17.2914	17.553	-0.261557	0.834187	NOT	0.0464672	0.224944	1.33285349625765
1278	Q8CEZ4	Mab21l4	17.8233	18.1993	-0.376067	0.770535	DOWN	0.0464736	0.224944	1.33279387121902
6735	Q99MB1	Tlr3	18.1308	17.8594	0.271495	1.20706	UP	0.0464805	0.224944	1.33272890046214
1243	P97433	Arhgef28	16.4131	16.797	-0.383865	0.766382	DOWN	0.0465167	0.224944	1.33239137343763
2398	Q9QUI0	Rhoa	21.3017	21.4763	-0.17458	0.886025	NOT	0.0465498	0.224944	1.33208194737173
8305	Q07797	Lgals3bp	19.7871	19.0226	0.764502	1.69878	UP	0.0465564	0.224944	1.33202082367881
854	O35074	Ptgis	20.824	21.3318	-0.507833	0.703278	DOWN	0.0465664	0.224944	1.33192731697197
959	Q9CX99	Grap	17.0156	17.4832	-0.467637	0.723148	DOWN	0.0465818	0.224944	1.33178377089252
8380	Q61881	Mcm7	19.014	18.1355	0.878467	1.83842	UP	0.046618	0.224944	1.33144623204266
7700	Q80T85	Dcaf5	16.5545	16.1049	0.449533	1.3656	UP	0.0466332	0.224944	1.33130494959177
2383	Q68FE6	Ripor1	18.2482	18.4249	-0.176772	0.88468	NOT	0.0466587	0.224944	1.33106702125068
8812	Q9CXN7	Pbld2	17.4201	12.6692	4.75094	26.9262	UP	0.0466654	0.224944	1.33100536084402
405	Q8K440	Abca8b	16.9139	17.6968	-0.782837	0.581223	DOWN	0.0466888	0.224944	1.33078691612825
1498	P46938	Yap1	17.3896	17.7127	-0.323103	0.799349	DOWN	0.0467308	0.224944	1.33039724875853
740	Q8C0V9	Frmd6	16.0462	16.6035	-0.557375	0.679537	DOWN	0.0467326	0.224944	1.33038028836408
6209	P68510	Ywhah	22.6272	22.418	0.209242	1.15608	NOT	0.0467531	0.224944	1.33018997775207
7348	Q1HFZ0	Nsun2	19.1994	18.8334	0.365988	1.28876	UP	0.0467835	0.224944	1.32990744838041
1677	Q62172	Ralbp1	17.7733	18.0617	-0.288382	0.81882	DOWN	0.0467863	0.224944	1.32988089032098
7264	Q9JHH9	Copz2	17.5861	17.2365	0.349635	1.27424	UP	0.0467957	0.224944	1.32979451591733
1510	Q9QZQ1	Afdn	19.5172	19.8374	-0.32017	0.800975	DOWN	0.0467989	0.224944	1.32976409498179
1433	Q9D6K5	Synj2bp	18.1734	18.5142	-0.340855	0.789573	DOWN	0.0468705	0.225123	1.32910000583914
8806	Q60591	Nfatc2	17.2572	12.5773	4.67992	25.6328	UP	0.0469086	0.225123	1.3287477969882
1689	P51174	Acadl	22.461	22.7475	-0.286527	0.819873	DOWN	0.0469123	0.225123	1.32871333889447
8784	O55226	Chad	17.1246	12.6943	4.43023	21.5591	UP	0.0470104	0.225472	1.32780588720174
8821	P35175	Stfa1	17.2018	12.2969	4.90496	29.96	UP	0.0470821	0.225632	1.32714421148341
7033	Q99KN2	Ciao1	17.6566	17.3448	0.31181	1.24126	UP	0.0470946	0.225632	1.32702898888889
2911	O08579	Emd	18.8469	18.9594	-0.112568	0.924941	NOT	0.0471523	0.225717	1.32649702624205
8626	Q9WV84	Nme4	14.3864	11.8759	2.51051	5.69822	UP	0.0471715	0.225717	1.32632058045937
7192	Q9CQ79	Txndc9	17.2828	16.9464	0.336342	1.26255	UP	0.0471887	0.225717	1.32616165553641
7214	Q9CZD3	Gars1	20.4039	20.0636	0.340235	1.26596	UP	0.0473005	0.225723	1.32513433270693
185	P97361	Bpifa1	17.4566	18.7006	-1.24398	0.422205	DOWN	0.0473056	0.225723	1.32508719690066
1845	Q9DCN1	Nudt12	16.584	16.8436	-0.259557	0.835344	NOT	0.0473121	0.225723	1.32502758211528
7849	Q8VDT9	Mrpl50	17.1137	16.6234	0.490322	1.40476	UP	0.0473279	0.225723	1.32488
1223	D3YVF0	Akap5	20.6075	20.9986	-0.391155	0.762519	DOWN	0.0473414	0.225723	1.32475882968667
7826	Q8CII2	Cdc123	17.0692	16.5869	0.482325	1.39699	UP	0.04739	0.225723	1.32431331879339
7770	Q9CWU2	Zdhhc13	17.6775	17.2105	0.46704	1.38227	UP	0.047391	0.225723	1.32430413629713
1287	Q8CGU1	Calcoco1	16.8497	17.2243	-0.374667	0.771283	DOWN	0.0474089	0.225723	1.32413994718447
1078	Q9D7P7	Clic3	22.1668	22.5932	-0.426372	0.74413	DOWN	0.0474188	0.225723	1.32404965130681
5519	P54823	Ddx6	20.785	20.6455	0.139472	1.1015	NOT	0.0475883	0.226408	1.32250021080231
6295	P62322	Lsm5	20.9125	20.6932	0.21935	1.16421	NOT	0.0476339	0.226419	1.32208427880292
459	Q9CQ33	Lztr1	19.4511	20.1846	-0.733495	0.601445	DOWN	0.0476447	0.226419	1.32198507513979
7357	P10107	Anxa1	24.103	23.7343	0.368685	1.29118	UP	0.0476685	0.226419	1.32176894214607
7619	Q8R015	Bloc1s5	18.5045	18.0763	0.42828	1.34563	UP	0.0476928	0.226419	1.3215474620805
6892	Q5SW19	Cluh	17.9375	17.6464	0.291123	1.22359	UP	0.0477633	0.22656	1.32090546600012
1154	Q9CXJ4	Abcb8	16.5557	16.9623	-0.406672	0.754361	DOWN	0.0477735	0.22656	1.32081312192055
7507	Q9DBH5	Lman2	21.0893	20.6843	0.40503	1.32412	UP	0.0478393	0.226751	1.32021554683742
7873	O35114	Scarb2	21.0579	20.5615	0.496468	1.41076	UP	0.0479634	0.226968	1.31909004753655
7240	Q8R4K2	Irak4	16.9829	16.6384	0.344502	1.26971	UP	0.0479905	0.226968	1.31884477954518
5015	Q3UM29	Cog7	18.1031	18.0102	0.0928475	1.06647	NOT	0.0479991	0.226968	1.31876698715404
612	Q9DBX6	Cyp2s1	19.3556	19.9745	-0.618877	0.651177	DOWN	0.0480118	0.226968	1.31865199359405
1977	P70336	Rock2	20.0038	20.2413	-0.23754	0.84819	NOT	0.048013	0.226968	1.31864130185291
5632	Q8VE99	Ccdc115	17.5683	17.4182	0.150078	1.10963	NOT	0.0480455	0.227001	1.31834768036679
6973	P35456	Plaur	18.1339	17.8298	0.304063	1.23462	UP	0.0480823	0.227054	1.31801515457354
49	Q9D7Z6	Clca1	11.7696	16.4655	-4.69588	0.0385834	DOWN	0.0481195	0.227109	1.31767845173388
8182	Q60716	P4ha2	18.3133	17.6598	0.65347	1.57295	UP	0.0481563	0.227162	1.31734678045827
8666	Q8CH77	Nav1	15.2036	12.0201	3.1835	9.08507	UP	0.0482235	0.227241	1.31674159648756
1075	Q9Z2C4	Mtmr1	16.7781	17.2052	-0.42709	0.74376	DOWN	0.0482244	0.227241	1.31673333817883
8279	P29452	Casp1	18.2439	17.5018	0.742095	1.6726	UP	0.0484455	0.228162	1.31474628849746
8140	Q8CIA5	Slc35b4	17.4184	16.797	0.62141	1.53838	UP	0.0485292	0.228314	1.31399650997033
989	Q3UH68	Limch1	21.2839	21.7415	-0.457593	0.7282	DOWN	0.0485594	0.228314	1.31372644656637
653	P01942	Hba	27.1097	27.7065	-0.59678	0.661228	DOWN	0.0485789	0.228314	1.31355193004051
8212	Q8C2K5	Rasal3	18.1452	17.4714	0.67385	1.59532	UP	0.0486135	0.228314	1.31324309226647
6761	A6H5X4	Phf11	18.0885	17.8142	0.274278	1.20939	UP	0.0486342	0.228314	1.31305804498666
7213	Q8BU30	Iars1	20.2899	19.9498	0.340122	1.26586	UP	0.0486701	0.228314	1.31273746696613
1252	P56581	Tdg	16.6053	16.9877	-0.38233	0.767198	DOWN	0.048678	0.228314	1.31266757697918
7880	Q8R2U6	Nudt4	18.6793	18.1793	0.499945	1.41416	UP	0.0486836	0.228314	1.31261715396194
631	Q9D067	Mdm1	17.4846	18.0947	-0.610062	0.655168	DOWN	0.0488431	0.22865	1.31119675314301
2246	Q8R0P4	Aamdc	17.5277	17.7225	-0.194845	0.873667	NOT	0.0488691	0.22865	1.31096543692996
1120	Q8CHU3	Epn2	19.4606	19.8767	-0.416162	0.749415	DOWN	0.0488814	0.22865	1.31085614195094
7714	Q99PG2	Ogfr	19.6078	19.1548	0.453033	1.36891	UP	0.0489642	0.22865	1.31012115054404
2936	Q9D142	Nudt14	18.027	18.1377	-0.1106	0.926203	NOT	0.0489693	0.22865	1.31007620158967
7788	P97822	Anp32e	20.4917	20.0197	0.471977	1.38701	UP	0.0489905	0.22865	1.30988850041011
8103	P97873	Loxl1	17.7734	17.179	0.594352	1.50979	UP	0.0490382	0.22865	1.30946508091326
4771	Q9JIX8	Acin1	19.644	19.5724	0.0716025	1.05088	NOT	0.0490425	0.22865	1.30942742581195
94	Q8K099	Lrit1	11.4132	14.061	-2.64781	0.159562	DOWN	0.0490603	0.22865	1.30926956143289
6483	P97868	Rbbp6	16.4164	16.1777	0.23867	1.1799	NOT	0.0490854	0.22865	1.30904731165288
7797	P58252	Eef2	23.7465	23.2736	0.47293	1.38793	UP	0.0490906	0.22865	1.30900127053179
8672	Q69ZL1	Fgd6	15.2907	12.0558	3.23482	9.4141	UP	0.0490971	0.22865	1.30894384098647
8782	P0C6B7	Igsf6	16.8948	12.482	4.41284	21.3008	UP	0.0491426	0.22865	1.30854163130915
2178	Q8CC88	Vwa8	18.7395	18.9441	-0.204588	0.867787	NOT	0.0491598	0.22865	1.30838967179188
6502	P58137	Acot8	18.4064	18.1652	0.241182	1.18196	NOT	0.0491613	0.22865	1.30837688869376
5589	P51791	Clcn3	15.3481	15.2015	0.146588	1.10695	NOT	0.0491676	0.22865	1.30832099908244
4708	Q9Z1K5	Arih1	18.5436	18.4777	0.0659	1.04674	NOT	0.0492725	0.229018	1.30739536657125
7242	P63276	Rps17	20.582	20.2374	0.344545	1.26975	UP	0.0493291	0.22902	1.30689715144238
8267	O35216	Cenpa	17.9748	17.2451	0.72972	1.65832	UP	0.0493562	0.22902	1.30665805582321
2373	P16330	Cnp	18.8159	18.9945	-0.178647	0.883531	NOT	0.0493753	0.22902	1.30648981283323
6084	Q62511	Zfp91	16.3233	16.129	0.194288	1.14416	NOT	0.0493858	0.22902	1.30639747580556
31	Q8BYN5	Fsd1l	11.8649	17.1243	-5.25941	0.0261072	DOWN	0.0494021	0.22902	1.3062542115442
7605	Q9R0P6	Sec11a	20.882	20.4589	0.423075	1.34078	UP	0.0494393	0.229055	1.30592742342237
8725	Q9WV30	Nfat5	16.3634	12.5295	3.83396	14.2605	UP	0.0494612	0.229055	1.30573558831062
7270	P31266	Rbpj	17.5604	17.2099	0.350457	1.27496	UP	0.0495091	0.229157	1.30531534560543
1272	P16546	Sptan1	23.2408	23.6189	-0.378022	0.769492	DOWN	0.049622	0.22946	1.30432546428708
676	Q71LX4	Tln2	18.5048	19.0893	-0.58446	0.666899	DOWN	0.0496262	0.22946	1.30428882975218
1051	Q62219	Tgfb1i1	20.8281	21.2649	-0.436773	0.738786	DOWN	0.0496576	0.229486	1.30401393306271
7472	Q8R5L3	Vps39	18.2549	17.8583	0.396515	1.31632	UP	0.049689	0.229511	1.30373942877151
1249	Q9D3G5	Stx11	17.9655	18.3487	-0.383122	0.766776	DOWN	0.0497163	0.229518	1.3035011039198
8640	Q9JLJ0	Litaf	14.9294	12.1659	2.76352	6.7905	UP	0.0497689	0.22955	1.30304209761394
7591	Q00993	Axl	16.4833	16.0635	0.419775	1.33772	UP	0.0497777	0.22955	1.30296533979578
8633	Q8CEE0	Cep57	14.8616	12.1612	2.70038	6.49974	UP	0.0498009	0.22955	1.30276283477759
7861	P61514	Rpl37a	19.3549	18.8614	0.493493	1.40785	UP	0.0498377	0.2296	1.30244207820429
510	Q9WUX5	Irag1	16.097	16.7825	-0.68544	0.621816	DOWN	0.0498885	0.229715	1.30199928395392
8344	Q91XB0	Trex1	17.3465	16.5384	0.80813	1.75094	UP	0.0499428	0.229846	1.30152705208576
1060	Q8K3H0	Appl1	19.0756	19.5084	-0.43284	0.740802	NOT	0.0500744	0.230332	1.30038439323451
5768	B1AZI6	Thoc2	19.0297	18.8667	0.163015	1.11962	NOT	0.0501085	0.230369	1.30008826833705
6837	P28301	Lox	16.8504	16.5663	0.284098	1.21765	NOT	0.0501507	0.230444	1.29972328652207
1022	Q62148	Aldh1a2	21.2776	21.7257	-0.448093	0.733011	NOT	0.050205	0.230465	1.29925289883022
8814	Q9Z0M9	Il18bp	17.382	12.5821	4.79983	27.8544	NOT	0.0502073	0.230465	1.29923294276904
588	Q8JZU6	Pxdc1	16.9752	17.6083	-0.633047	0.644813	NOT	0.0502715	0.230641	1.29867843255608
8719	O35732	Cflar	16.0282	12.264	3.76429	13.5882	NOT	0.0504856	0.231097	1.29683227151119
6915	Q8BP01	Vmac	16.7429	16.4472	0.295722	1.2275	NOT	0.0504985	0.231097	1.29672154770946
5209	Q9Z1F9	Uba2	20.0016	19.8902	0.111397	1.08027	NOT	0.0505163	0.231097	1.29656850926596
8791	P32443	Meox2	17.1501	12.6706	4.47953	22.3086	NOT	0.0505485	0.231097	1.29629200227335
885	Q64471	Gstt1	20.7624	21.2604	-0.497968	0.708104	NOT	0.050549	0.231097	1.29628774083844
8056	P29391	Ftl1	20.294	19.7221	0.571923	1.4865	NOT	0.050563	0.231097	1.29616707195374
7287	Q31125	Slc39a7	18.7029	18.3496	0.353297	1.27748	NOT	0.0505836	0.231097	1.29599065180797
249	Q91WU0	Ces1f	19.5293	20.5569	-1.02761	0.490522	NOT	0.0506238	0.231097	1.29564530976017
6526	Q6A068	Cdc5l	19.1112	18.8674	0.24386	1.18416	NOT	0.0506239	0.231097	1.29564416019434
7652	Q9EQ61	Pes1	17.3796	16.9434	0.436135	1.35297	NOT	0.0506526	0.231097	1.29539848887586
1721	Q9DBR4	Apbb2	19.4266	19.7044	-0.277855	0.824816	NOT	0.0506574	0.231097	1.29535729282421
5460	P56399	Usp5	20.8565	20.7227	0.133772	1.09716	NOT	0.0507384	0.231159	1.29466342038013
1376	O70589	Cask	17.9468	18.3006	-0.353765	0.782539	NOT	0.0507425	0.231159	1.29462844772482
474	Q7TPD6	Raver2	15.2769	15.9925	-0.71558	0.60896	NOT	0.0507492	0.231159	1.29457071391349
270	P28654	Dcn	20.5333	21.5212	-0.987918	0.504205	NOT	0.0509017	0.231735	1.29326777270587
7673	Q4KML4	Abracl	22.1627	21.7209	0.441808	1.35831	NOT	0.050959	0.231877	1.29277888143542
1135	Q2KN98	Specc1l	17.8915	18.3041	-0.412577	0.75128	NOT	0.0510232	0.23205	1.2922325116936
7727	Q8BMJ2	Lars1	19.4543	18.9985	0.45585	1.37159	NOT	0.0511068	0.232284	1.29152097968477
7175	Q3U1Z5	Gpsm3	19.2646	18.9316	0.333008	1.25964	NOT	0.0511831	0.232284	1.29087356652829
8574	P28776	Ido1	18.1352	16.6265	1.5087	2.84554	NOT	0.0511905	0.232284	1.29081045032329
7100	Q9CQG6	Tmem147	17.9631	17.6406	0.322452	1.25045	NOT	0.0512309	0.232284	1.29046769244506
7422	Q9DCR2	Ap3s1	18.9353	18.5533	0.381985	1.30313	NOT	0.0512353	0.232284	1.29043073346196
8487	Q923B6	Steap4	18.9885	17.897	1.09144	2.13087	NOT	0.0512525	0.232284	1.2902849372186
6347	P18760	Cfl1	24.5116	24.287	0.224552	1.16841	NOT	0.051258	0.232284	1.29023808907199
1285	Q62523	Zyx	21.354	21.7288	-0.374812	0.771206	NOT	0.0513533	0.232597	1.28943179532004
1853	Q3U6K5	Spata6	16.5513	16.8097	-0.258427	0.835999	NOT	0.0513944	0.232652	1.28908384480327
2081	B2RU80	Ptprb	17.0974	17.3177	-0.220312	0.858379	NOT	0.0514695	0.232652	1.28845011818242
1983	Q8BUY9	Pggt1b	19.0254	19.2627	-0.237292	0.848336	NOT	0.0515065	0.232652	1.28813812075596
1483	P58466	Ctdsp1	17.6578	17.9862	-0.328425	0.796405	NOT	0.0515328	0.232652	1.28791593112575
6765	Q99N94	Mrpl9	17.2589	16.9838	0.275178	1.21014	NOT	0.0515804	0.232652	1.28751508378795
5873	Q60668	Hnrnpd	22.7098	22.5377	0.172127	1.12672	NOT	0.0516197	0.232652	1.28718425456207
1351	P70122	Sbds	20.1249	20.4839	-0.359025	0.779691	NOT	0.0516279	0.232652	1.28711533792917
5759	P70399	Tp53bp1	17.2725	17.1102	0.1623	1.11907	NOT	0.0516304	0.232652	1.28709466170702
8404	Q9JL16	Isg20	17.9107	16.9967	0.913987	1.88425	NOT	0.0516379	0.232652	1.28703112507574
1601	Q9Z0F7	Sncg	18.0385	18.3414	-0.302943	0.810597	NOT	0.0516584	0.232652	1.28685906604013
70	Q8VHG0	Fmo4	11.1829	15.1528	-3.9699	0.0638178	NOT	0.0516997	0.232652	1.28651192659543
1527	Q8R4E6	Purg	17.7874	18.1039	-0.316465	0.803035	NOT	0.0517207	0.232652	1.28633553033694
1670	Q8BG67	Efr3a	18.1904	18.4798	-0.289405	0.818239	NOT	0.0517231	0.232652	1.28631520187754
8143	Q9CZH3	Psmg3	17.534	16.9107	0.623335	1.54043	NOT	0.0517802	0.232652	1.28583618418409
689	Q9QY40	Plxnb3	17.977	18.557	-0.57997	0.668978	NOT	0.0517813	0.232652	1.2858273440941
6164	Q60749	Khdrbs1	19.9228	19.7194	0.20339	1.1514	NOT	0.0517849	0.232652	1.28579715159515
2779	O70439	Stx7	20.7339	20.8605	-0.126617	0.915977	NOT	0.0518189	0.232687	1.28551150026122
7345	Q78PG9	Ccdc25	17.6783	17.3137	0.364585	1.28751	NOT	0.051874	0.232752	1.28505011160453
8495	Q8VE42	Ankrd49	15.6517	14.5327	1.11899	2.17196	NOT	0.0518859	0.232752	1.28495065407004
6876	Q9WUH1	Tmem115	17.4229	17.1338	0.289162	1.22193	NOT	0.0519749	0.233033	1.28420650469775
8636	Q6GQT6	Scap	14.5659	11.8393	2.72664	6.61912	NOT	0.0520094	0.233071	1.28391776391648
1460	Q8K012	Fnbp1l	18.4235	18.7591	-0.33559	0.79246	NOT	0.0520823	0.233112	1.28330952832412
275	P56392	Cox7a1	18.2706	19.2521	-0.981515	0.506448	NOT	0.0521325	0.233112	1.28289143976807
79	Q8VHH7	Adcy3	11.482	14.8739	-3.39182	0.0952706	NOT	0.0521586	0.233112	1.28267389092839
6903	Q8BHG1	Nrdc	19.3912	19.0982	0.292998	1.22518	NOT	0.0521609	0.233112	1.28265518187044
8661	Q9CX13	Cnih4	15.2896	12.1962	3.09337	8.53487	NOT	0.0521678	0.233112	1.28259751941277
8354	Q9D8P4	Mrpl17	16.804	15.9757	0.8283	1.77559	NOT	0.052201	0.233112	1.28232101918629
795	Q91VS7	Mgst1	22.0266	22.5569	-0.530325	0.692399	NOT	0.0522025	0.233112	1.28230852324387
1468	Q8VCC9	Spon1	18.6671	19.0003	-0.333267	0.793737	NOT	0.0522314	0.233124	1.28206792583876
211	Q149L6	Dnajb14	16.2948	17.4305	-1.13579	0.455086	NOT	0.052335	0.233317	1.28120767191594
5945	Q91ZW3	Smarca5	19.4907	19.3111	0.179515	1.1325	NOT	0.0523355	0.233317	1.28120399576046
1613	Q62074	Prkci	18.0847	18.3859	-0.301125	0.811619	NOT	0.0523537	0.233317	1.2810528356291
990	Q8R071	Itpka	17.6552	18.1124	-0.457165	0.728416	NOT	0.052487	0.233752	1.2799484480805
7750	Q9EQU5	Set	21.5234	21.063	0.46042	1.37594	NOT	0.0525233	0.233752	1.27964814415994
181	B0V2N1	Ptprs	12.5435	13.8077	-1.26422	0.416324	NOT	0.0525303	0.233752	1.27958987091346
8803	Q8VC04	Tmem106a	17.0047	12.3795	4.62523	24.6794	NOT	0.0526284	0.233819	1.27877955256066
526	Q9CXT7	Tmem192	15.9947	16.671	-0.67631	0.625764	NOT	0.0526637	0.233819	1.27848868960355
975	A2A8U2	Tmem201	17.6033	18.0649	-0.461612	0.726174	NOT	0.0526725	0.233819	1.27841622485055
1712	P27600	Gna12	17.2173	17.4978	-0.280473	0.823321	NOT	0.05268	0.233819	1.27835464591098
1850	P59672	Anks1a	18.5833	18.8423	-0.259	0.835667	NOT	0.0527646	0.233819	1.27765718521318
[truncated: 6,874 more rows]
